# Supplementary material for: A Functional Genomic Screen for Evolutionarily Conserved Genes Required for Lifespan and Immunity in Germline-Deficient C. elegans
Source: PubMed Central journal article supplement (PMC4122342; doi:10.1371/journal.pone.0101970), 2014-08-05

**Figure S2: The new genes identified as being integral for survival towards *X. nematophila* are also essential for lifespan.**

Lifespan analysis of *C. elegans glp-1(e2141)*; empty vector control (RNAi) (blue) n = 100 (2 independent replicates), *glp-1(e2141)*; T12G3.6 (RNAi) (green) n = 100 (2), and *glp-1(e2141)*; *par-5* (RNAi) (red) n = 90 (2) when fed *E. coli* OP50.

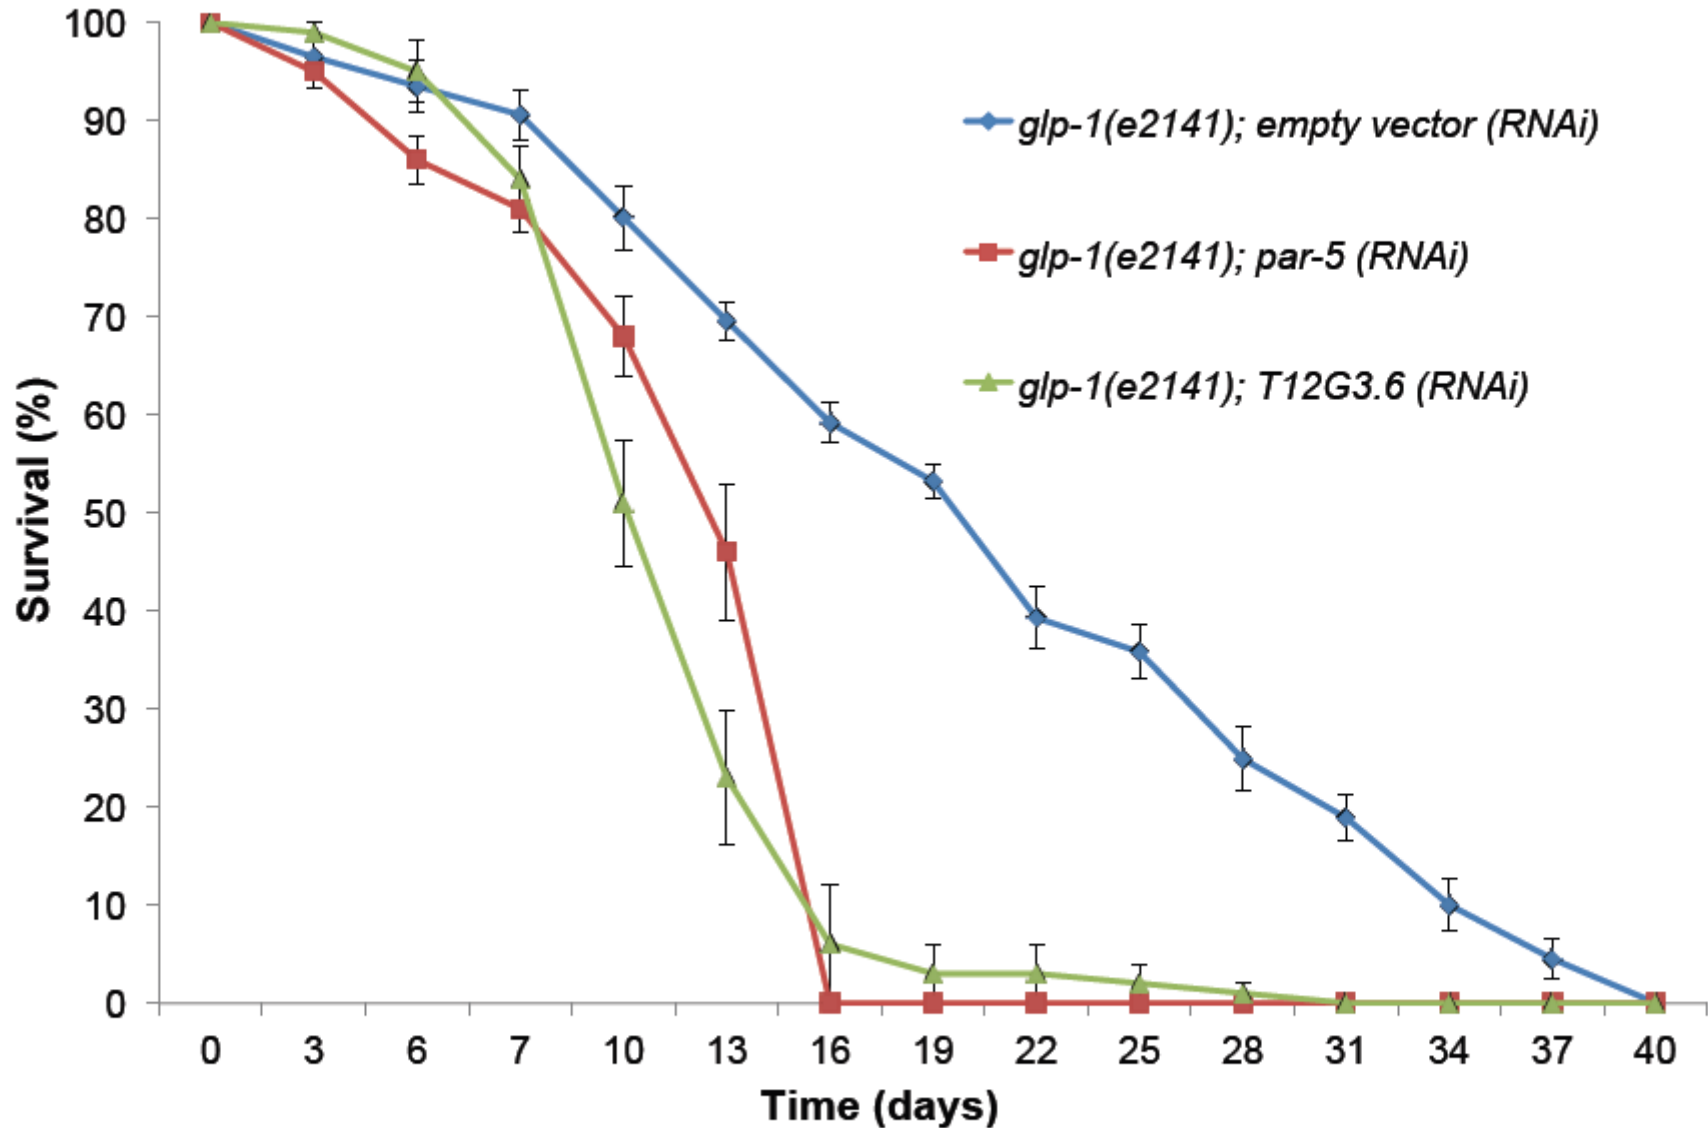

Supplement: pone.0101970.s002.pdf [file pone.0101970.s002.pdf]
