# Supplementary material for: A Functional Genomic Screen for Evolutionarily Conserved Genes Required for Lifespan and Immunity in Germline-Deficient C. elegans
Source: PubMed Central journal article supplement (PMC4122342; doi:10.1371/journal.pone.0101970), 2014-08-05

**Figure S3: The effect of RNAi knock down of genes identified on normal lifespan of *C. elegans* wild type.**

Lifespan analysis of *C. elegans* WT; empty vector control (RNAi) (blue) n = 60 (2), *C. elegans* WT; T12G3.6 (purple) n = 63 (2), and *C. elegans* WT; *par-5* (RNAi) (red) n = 60 (2) when fed *E. coli* OP50.

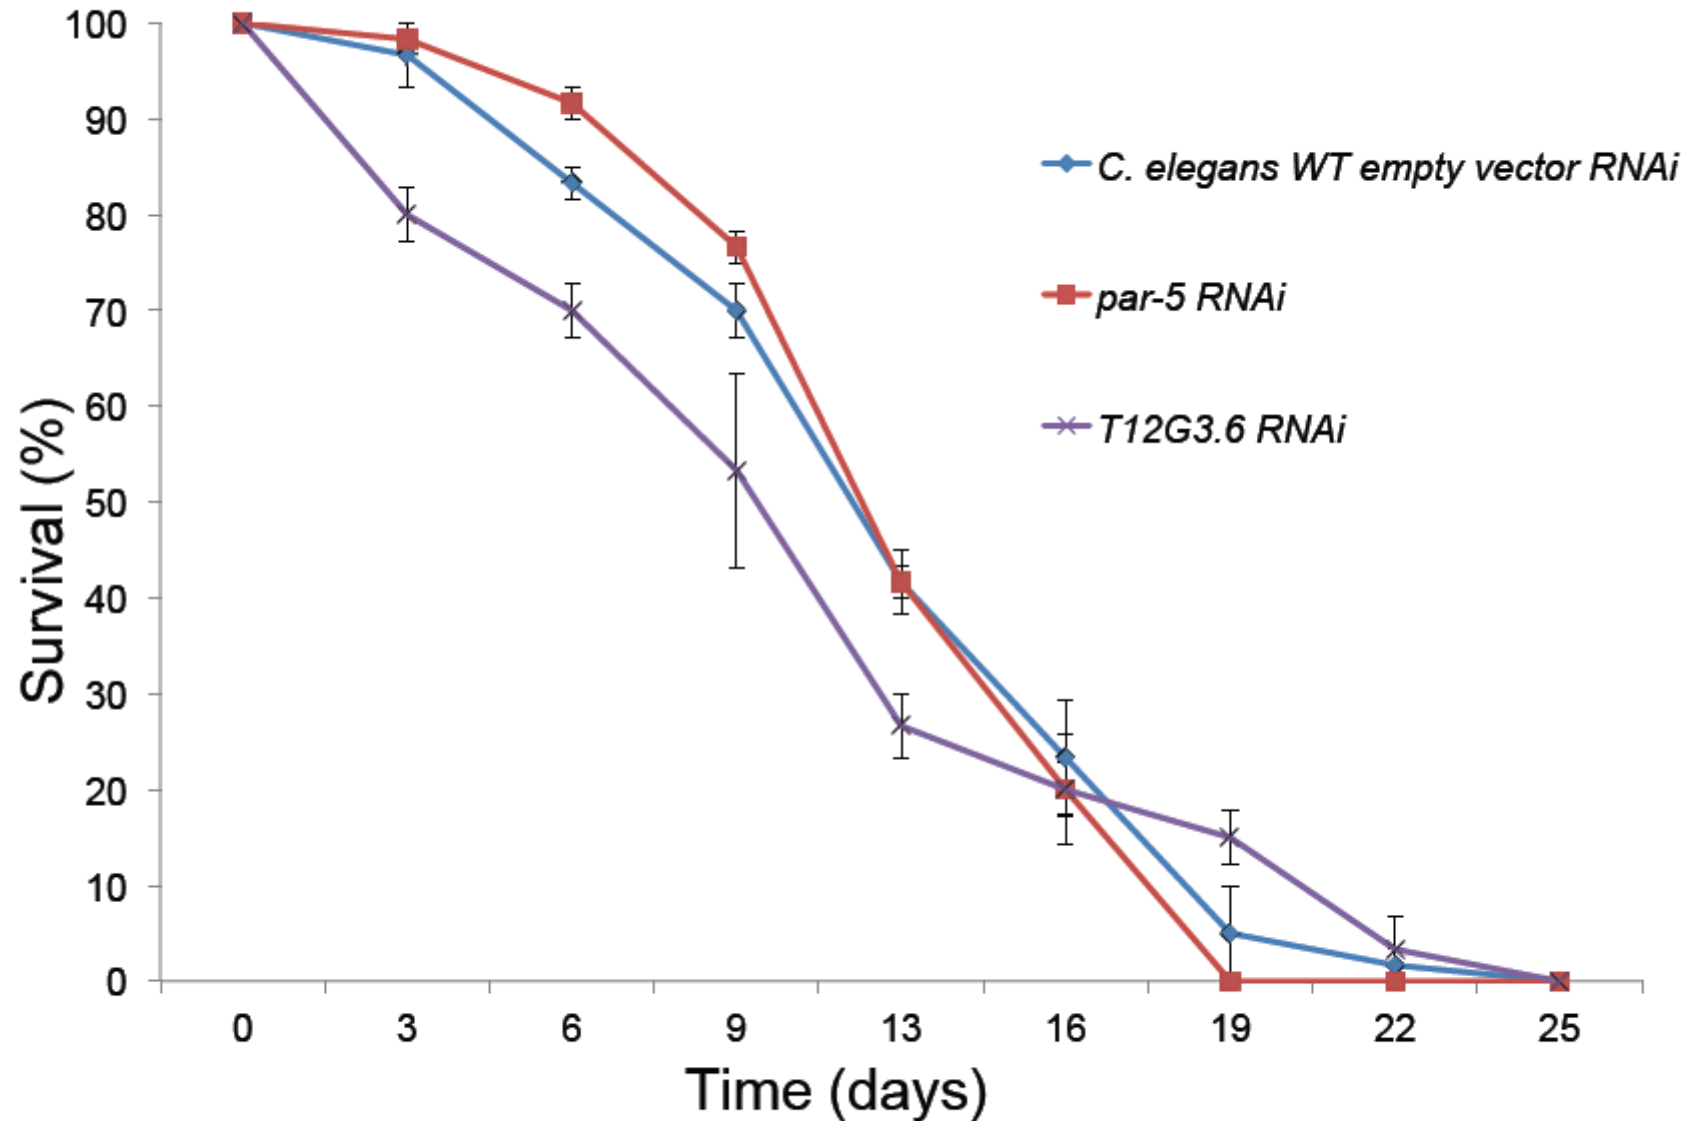

Supplement: pone.0101970.s003.pdf [file pone.0101970.s003.pdf]
