# Supplementary material for: A Functional Genomic Screen for Evolutionarily Conserved Genes Required for Lifespan and Immunity in Germline-Deficient C. elegans
Source: PLoS One. 2014 Aug 5;9(8):e101970. doi: 10.1371/journal.pone.0101970 (PMC4122342; doi:10.1371/journal.pone.0101970)
Supplement: Table S4 — Genes differentially regulated in gonad-ablated animals. Comparison of germline Z(1,4)-ablated animals against intact wild-type controls. (XLSX) [file pone.0101970.s007.xlsx]

## Sheet: Table S4
Table S4: Genes differentially regulated in gonad ablated animals Comparison of gonad Z14 ablated animals against intact wild-type controls
ID	celPublic	logFC	P.Value	AveExpr
F35E12.5	F35E12.5	4.60393	0.00176	10.0389
F15E11.15	F15E11.15	3.57957	0.00354	10.4753
F21C10.11	F21C10.11	3.32409	0.00267141	9.34081
C05C10.4	pho-11	3.27064	0.00354	11.5805
F15E11.12	F15E11.12	3.13234	0.0104	10.4946
K11G9.6	mtl-1	2.98536	0.00325	10.9126
Y73B6BL.24	acp-6	2.88036	0.00419	12.3562
F40F4.6	F40F4.6	2.73939	0.00331562	11.8737
C17F4.7	C17F4.7	2.50412	0.0172	10.9551
C50B6.7	C50B6.7	2.47836	0.0129	9.91538
F53A9.8	F53A9.8	2.41932	0.0294	10.2288
B0035.13	B0035.13	2.32471	0.0199	9.99139
T20G5.7	dod-6	2.31854	0.0167	9.75002
T28F3.8	T28F3.8	2.30108	0.00437815	10.4477
Y32B12C.1	Y32B12C.1	2.25127	0.0417809	7.46806
M02D8.4	asns-2	2.23978	0.0129487	9.49449
T12A7.4	lips-5	2.21782	0.00427763	7.52758
F45E4.8	nlp-20	2.2126	0.0165103	8.19482
C14A6.10	C14A6.10	2.16007	0.0342	11.876
W04E12.8	clec-50	2.13452	0.013576	11.5275
ZC204.12	ZC204.12	2.06323	0.0299189	9.33922
F14F11.2	F14F11.2	2.04087	0.02	7.56382
Y54G2A.45	Y54G2A.45	1.98524	0.00603789	9.45758
T26H5.9	T26H5.9	1.95624	0.0337	9.13287
CD4.1	CD4.1	1.92948	0.0473	7.96938
T20B3.1	T20B3.1	1.90265	0.0178644	8.80376
F15B9.1	far-3	1.87148	0.0243326	10.7386
D1086.3	D1086.3	1.83388	0.0216533	9.60549
W03B1.2	W03B1.2	1.82294	0.0273498	7.64676
B0218.1	faah-1	1.73594	0.0395233	8.73671
F53A9.2	F53A9.2	1.72822	0.0234747	8.60541
Y51H4A.8	Y51H4A.8	1.71474	0.0432499	7.45342
Y110A7A.21	Y110A7A.21	1.69363	0.0225867	7.53446
C54F6.14	ftn-1	1.67032	0.047884	9.89293
C08E3.9	fbxa-166	1.65375	0.0400491	7.15797
C34H4.1	C34H4.1	1.64659	0.0270083	8.66471
Y34B4A.9	Y34B4A.9	1.64309	0.0169998	11.6723
Y51A2D.4	hmit-1.1	1.6408	0.0306365	8.09047
F55G7.1	F55G7.1	1.64058	0.0456608	7.21861
F19C7.1	F19C7.1	1.63851	0.040747	10.0252
Y43C5A.2	Y43C5A.2	1.6308	0.0152536	10.6123
C08F11.13	C08F11.13	1.62135	0.0167224	9.71311
F14D7.14	F14D7.14	1.59109	0.0350255	7.37694
Y46G5A.22	Y46G5A.22	1.57782	0.0250727	7.0517
H12D21.10	H12D21.10	1.56836	0.0338302	7.44643
F13D12.9	F13D12.9	1.56776	0.0379688	7.15684
Y51H4A.24	Y51H4A.24	1.56624	0.0355967	9.73132
F45E4.5	F45E4.5	1.53712	0.0437899	7.66295
T19H12.10	ugt-11	1.50379	0.0452287	7.55161
F59A7.2	F59A7.2	1.4953	0.0460287	7.77608
C44E12.1	C44E12.1	1.48158	0.0393025	7.50971
C01F6.6	tag-60	1.47168	0.0394669	7.46072
T04C12.3	T04C12.3	1.46486	0.0295098	7.28739
C23H4.8	C23H4.8	1.44296	0.0392122	7.30634
F36H5.2	math-27	1.43564	0.0485812	7.20718
W04G3.11	W04G3.11	1.4115	0.0473801	7.06106
K08B12.2	dmd-7	1.40362	0.046788	7.34436
F35D11.11	dyf-14	1.39092	0.0386746	7.27424
Y37H2A.14	Y37H2A.14	1.35728	0.0484466	9.01213
C05E11.8	flp-12	1.34872	0.0285317	7.70065
Y46C8AL.9	clec-75	1.20129	0.046056	7.28917
C08E3.1	C08E3.1	1.17629	0.0443862	7.00704
F40F4.4	lbp-3	-1.20065	0.0435394	9.59809
Y37D8A.2	Y37D8A.2	-1.21926	0.0407878	11.034
T21B4.17	T21B4.17	-1.29103	0.0424514	8.0002
C23H3.4	sptl-1	-1.29183	0.0273407	10.5555
Y119C1A.1	Y119C1A.1	-1.3053	0.0316174	7.60344
K09G1.1	K09G1.1	-1.3219	0.0437899	8.63266
C17G10.8	dhs-6	-1.3261	0.0437899	9.28451
ZK945.4	ZK945.4	-1.3269	0.0292856	7.64929
E04F6.8	E04F6.8	-1.32887	0.0497033	9.90844
C32D5.9	lgg-1	-1.3542	0.030268	10.4396
W04D2.3	inx-11	-1.35626	0.0377479	8.95122
K12C11.1	K12C11.1	-1.3604	0.0290599	9.84685
T15H9.7	dnj-20	-1.37679	0.0308457	10.0115
ZK1193.1	col-19	-1.37871	0.0358232	10.65
R04A9.4	ife-2	-1.40765	0.030832	9.5566
M199.4	clec-190	-1.42334	0.0387944	8.12325
C05E4.3	srp-1	-1.42735	0.0432163	8.91812
ZK1193.2	ZK1193.2	-1.44218	0.0306263	8.23346
F45H10.3	F45H10.3	-1.45575	0.0281216	10.1667
C17E4.4	C17E4.4	-1.46451	0.0401678	7.73754
Y51H7C.5	Y51H7C.5	-1.4703	0.0244717	7.99588
Y37E3.10	Y37E3.10	-1.48037	0.0284971	7.71729
Y66H1B.4	spl-1	-1.4937	0.0484371	9.93099
B0272.3	B0272.3	-1.4975	0.0217343	9.69388
B0365.3	eat-6	-1.49805	0.0180486	9.86074
C04A2.1	tbc-6	-1.50118	0.0471459	7.72451
K07A3.1	fbp-1	-1.51267	0.0222054	8.66772
F36H1.4	lin-3	-1.52521	0.0441814	7.39349
F44C4.3	cpr-4	-1.52763	0.0241527	9.508
Y27F2A.3	sri-40	-1.52894	0.0474516	7.606
F11H8.4	cyk-1	-1.54058	0.030916	7.6221
F20D1.3	F20D1.3	-1.54743	0.0199684	8.96245
D2030.2	D2030.2	-1.5501	0.0170502	10.4821
F44F4.11	tba-4	-1.55301	0.0373691	8.75648
B0410.2	vang-1	-1.55344	0.0299746	7.52992
C02B10.1	ivd-1	-1.55802	0.0323112	10.4756
F49E12.2	dod-23	-1.56098	0.0229913	9.4388
C01B10.3	C01B10.3	-1.56318	0.0305954	8.99076
F20G2.1	F20G2.1	-1.57107	0.0214687	8.67765
C09F5.2	orai-1	-1.57774	0.0463033	9.58402
EEED8.10	EEED8.10	-1.57792	0.0217948	8.82293
T08A9.8	spp-4	-1.58011	0.0339466	9.00185
C06C3.1	mel-11	-1.58251	0.0183374	7.59202
F54D8.3	alh-1	-1.58674	0.0335506	11.7922
D1009.2	cyn-8	-1.58756	0.0258602	7.9299
C56G7.3	C56G7.3	-1.58884	0.0434572	7.63262
PAR2.3	aak-1	-1.59282	0.0185663	7.99418
F55D10.3	glit-1	-1.61126	0.0259253	7.91624
F11E6.5	elo-2	-1.61998	0.0138674	10.7105
C35D10.9	ced-4	-1.62229	0.0247824	7.49289
F23A7.4	F23A7.4	-1.62909	0.0125897	12.2429
MTCE.7	MTCE.7	-1.63241	0.0172129	10.1818
M01E11.4	pqn-52	-1.63322	0.0201135	8.56048
F36A2.7	F36A2.7	-1.63501	0.0185785	12.4293
B0250.5	B0250.5	-1.63879	0.0117891	10.2591
T03F6.1	qdpr-1	-1.63987	0.0124153	9.85841
T05A12.2	tre-2	-1.64163	0.0178085	9.70724
K08B4.6	cpi-1	-1.64635	0.0223741	11.3847
Y38F2AR.3	Y38F2AR.3	-1.64852	0.0365446	8.27335
Y38C1AA.14	Y38C1AA.14	-1.65185	0.0110125	7.65856
F25B4.1	F25B4.1	-1.65216	0.0225758	10.8344
R12B2.5	mdt-15	-1.65221	0.0139201	9.53771
F18G5.6	F18G5.6	-1.65716	0.0425507	8.15604
VW06B3R.1	ucr-2.1	-1.66141	0.0105684	9.38544
F09F7.4	F09F7.4	-1.66263	0.0215972	10.5246
B0334.3	B0334.3	-1.66291	0.0117481	9.92027
F54F2.8	prx-19	-1.6642	0.0195556	8.71028
Y71H2AR.1	Y71H2AR.1	-1.66677	0.0405066	9.12078
Y25C1A.13	Y25C1A.13	-1.6676	0.0179041	8.76171
Y65B4A.3	vps-20	-1.66999	0.0117847	10.915
F32E10.9	F32E10.9	-1.67174	0.0252729	7.86605
F59F3.1	ver-3	-1.67472	0.0229219	8.52044
F13B9.8	fis-2	-1.68106	0.0419503	9.35016
Y57G11C.10	gdi-1	-1.68291	0.017134	9.97922
K02B9.4	elt-3	-1.68655	0.0141978	8.17455
C34F6.3	col-179	-1.69009	0.0205798	9.72501
R07G3.1	cdc-42	-1.6911	0.0397413	7.72769
T20F10.2	T20F10.2	-1.6978	0.0125896	8.03245
C05E11.1	lnp-1	-1.69839	0.0273545	7.91253
ZK856.16	ZK856.16	-1.699	0.0174742	7.64299
C44E4.8	C44E4.8	-1.6992	0.0315533	7.82665
C37C3.8	tag-253	-1.70283	0.033051	8.5005
C02E11.1	nra-4	-1.70439	0.0232407	9.32654
C14H10.1	C14H10.1	-1.70683	0.0161043	8.62605
C05C10.3	C05C10.3	-1.71162	0.0179706	10.7848
C23G10.2	C23G10.2	-1.71672	0.0121434	10.6955
Y62E10A.1	rla-2	-1.71708	0.0156496	10.9473
C06H2.1	atp-5	-1.72414	0.019795	12.1048
F59A3.3	F59A3.3	-1.72443	0.0427482	8.08435
W06H8.1	rme-1	-1.72767	0.011404	8.42073
R07B5.9	lsy-12	-1.72775	0.0138674	7.82185
W01A8.1	mdt-28	-1.72846	0.0160865	9.30736
R11E3.8	dpf-5	-1.73113	0.0106432	9.59893
T20G5.2	cts-1	-1.73999	0.0116496	12.8649
C14B9.2	C14B9.2	-1.74107	0.0223741	8.22236
B0035.1	B0035.1	-1.74175	0.0407417	8.45735
W06B4.3	vps-18	-1.74339	0.00981632	8.12769
F48C1.6	F48C1.6	-1.74354	0.0295098	8.09822
R53.4	R53.4	-1.74725	0.00758713	12.2135
T19A6.3	T19A6.3	-1.74904	0.0267266	9.29913
F01F1.12	aldo-2	-1.75107	0.010615	11.5483
B0361.5	psd-1	-1.75137	0.0234747	9.31464
F47D12.4	hmg-1.2	-1.75533	0.0486435	8.77145
C15F1.6	art-1	-1.7562	0.0186256	10.684
F38B2.1	ifa-1	-1.75953	0.0351452	8.55034
F26H9.5	F26H9.5	-1.75958	0.01922	10.4545
T03F6.3	T03F6.3	-1.76465	0.032879	10.6388
C15C8.3	C15C8.3	-1.7652	0.0472755	11.4417
Y48G10A.1	Y48G10A.1	-1.77066	0.0237755	8.9776
C28C12.7	spp-10	-1.7781	0.00961773	11.4479
R07H5.8	R07H5.8	-1.78427	0.0157353	9.5146
R10E11.8	vha-1	-1.78609	0.0172076	10.2474
M03F8.3	M03F8.3	-1.78695	0.019284	7.92983
F29G9.7	F29G9.7	-1.7899	0.0392122	7.59155
F33A8.4	F33A8.4	-1.79294	0.0451791	7.88387
C27H6.4	rmd-2	-1.79448	0.0394909	11.2069
K02C4.3	K02C4.3	-1.79457	0.0361467	7.85892
C14F11.1	C14F11.1	-1.79509	0.0199919	10.6612
F57B10.3	F57B10.3	-1.79818	0.013062	11.0002
MTCE.21	ctb-1	-1.8003	0.0244497	13.3495
F26A3.2	ncbp-2	-1.80314	0.0479833	8.33307
MTCE.3	MTCE.3	-1.80397	0.0373467	10.3857
Y82E9BR.3	Y82E9BR.3	-1.80672	0.0205173	14.1122
T11F9.11	dhs-19	-1.80765	0.0235046	8.66075
Y38A10A.5	crt-1	-1.80887	0.0368905	10.1796
Y49A3A.2	vha-13	-1.81197	0.0200387	8.61678
F25B3.6	F25B3.6	-1.81256	0.032969	8.27987
B0432.4	misc-1	-1.81374	0.0381539	9.61543
Y46G5A.5	pisy-1	-1.81476	0.0125828	8.10898
F39B2.7	F39B2.7	-1.81598	0.0213518	7.97426
W06A7.3	ret-1	-1.81788	0.0186919	9.82451
R160.1	dpy-23	-1.81865	0.0396634	9.16882
F08F1.8	tth-1	-1.81902	0.0108199	8.28825
H37A05.4	H37A05.4	-1.81942	0.0194649	8.24733
F20D1.9	F20D1.9	-1.82651	0.0437899	8.74141
MTCE.34	MTCE.34	-1.82999	0.0245326	12.228
R11H6.1	pes-9	-1.83101	0.00996489	11.1012
F58B3.4	F58B3.4	-1.83314	0.0484795	8.02373
R05F9.1	R05F9.1	-1.83596	0.0116858	8.28327
F28H1.1	F28H1.1	-1.83773	0.0221957	8.02975
ZK377.2	sax-3	-1.83935	0.0299434	7.51219
C34D4.13	C34D4.13	-1.84054	0.0425507	7.8967
Y37E3.11	Y37E3.11	-1.84518	0.0265862	8.12647
F10G7.1	tag-151	-1.84786	0.0256864	8.20025
F27D4.8	F27D4.8	-1.84916	0.0275265	7.60677
F28B12.2	egl-44	-1.85044	0.0194437	8.00003
C50F2.6	fkb-5	-1.85322	0.0452958	7.94546
E04F6.5	acdh-12	-1.85407	0.00957219	10.4815
H06I04.1	H06I04.1	-1.85458	0.0362391	8.48738
F35G12.8	smc-4	-1.85597	0.0479304	8.05962
F52C6.3	F52C6.3	-1.85619	0.0204963	7.7859
C14C10.2	C14C10.2	-1.85626	0.0201377	7.89409
ZK829.5	tbx-36	-1.85806	0.0464698	7.65017
Y39B6A.40	Y39B6A.40	-1.86325	0.0421897	7.61845
M106.3	M106.3	-1.86564	0.0179844	8.41651
M02B7.2	M02B7.2	-1.86643	0.030253	8.26826
F59F4.2	F59F4.2	-1.86771	0.0104977	8.1655
ZC513.7	ZC513.7	-1.87127	0.0216601	10.2496
K12H4.4	K12H4.4	-1.8719	0.00811733	9.81966
B0495.7	B0495.7	-1.8719	0.0379349	10.4009
Y71H2AM.5	Y71H2AM.5	-1.87213	0.00557203	11.8352
Y73B3A.18	Y73B3A.18	-1.87423	0.0148113	8.49262
T20F5.7	T20F5.7	-1.87545	0.0101279	7.85278
Y76A2B.5	Y76A2B.5	-1.87573	0.0352198	9.29642
B0001.8	B0001.8	-1.87624	0.0324042	7.54243
T08B1.1	T08B1.1	-1.87841	0.0336658	8.40675
C09D4.2	C09D4.2	-1.87904	0.0474758	9.33893
F47B7.2	F47B7.2	-1.87926	0.0161474	9.33347
T04D3.1	T04D3.1	-1.88114	0.045192	8.10401
K01G5.3	K01G5.3	-1.88208	0.0381539	8.0298
ZK1236.5	ZK1236.5	-1.88286	0.00896375	8.90703
Y5H2B.2	nhr-13	-1.88346	0.0324742	8.34663
F55C5.7	rskd-1	-1.88466	0.0306365	8.72
T23G7.4	sec-5	-1.8945	0.0118191	8.20805
Y62E10A.13	Y62E10A.13	-1.89575	0.0221016	9.78818
Y76A2B.1	pod-1	-1.897	0.0342622	8.75401
Y82E9BR.16	Y82E9BR.16	-1.90105	0.0104021	9.87592
T23F2.3	T23F2.3	-1.90139	0.0130321	8.21919
R02F2.1	R02F2.1	-1.9027	0.00913798	9.80598
Y39G10AR.8	Y39G10AR.8	-1.90669	0.0441814	8.81541
K08A2.4	K08A2.4	-1.90803	0.0451047	8.58106
C01C7.1	ark-1	-1.90845	0.0469818	8.15176
C06A6.4	C06A6.4	-1.91174	0.0346445	9.9935
F58F12.1	F58F12.1	-1.91421	0.00629892	11.273
T24H7.5	tat-4	-1.91644	0.0130444	11.8249
C29F7.2	C29F7.2	-1.91797	0.00576482	8.71963
F58D5.9	F58D5.9	-1.92555	0.0121567	7.55873
F07F6.7	F07F6.7	-1.92563	0.0243476	8.18254
ZK1005.1	pme-5	-1.92706	0.0190657	8.59925
T04G9.5	trap-2	-1.92808	0.0123641	9.43759
F20D1.10	tag-299	-1.93054	0.0108824	8.5056
F09C8.1	F09C8.1	-1.93495	0.0139005	9.18953
F44B9.6	lin-36	-1.94062	0.0398905	8.3763
F33E2.5	F33E2.5	-1.945	0.0237755	8.58614
ZK154.3	mec-7	-1.946	0.0232865	9.51495
C32E8.9	C32E8.9	-1.94678	0.0186281	8.6789
ZK177.8	ZK177.8	-1.9598	0.0287689	10.2466
Y38E10A.24	Y38E10A.24	-1.96294	0.0253065	10.4197
Y47G6A.18	Y47G6A.18	-1.96336	0.0061758	9.28388
T24H7.2	T24H7.2	-1.96345	0.0125874	9.02698
T26C12.1	T26C12.1	-1.96674	0.0223789	9.88849
Y56A3A.19	Y56A3A.19	-1.96791	0.0180087	9.32466
MTCE.23	MTCE.23	-1.96998	0.0320776	14.4206
T05H4.12	atp-4	-1.97218	0.00573074	10.4719
Y43F4B.5	Y43F4B.5	-1.97301	0.00768713	9.53263
C01G6.5	C01G6.5	-1.97476	0.0410233	7.79946
F55G1.5	F55G1.5	-1.97525	0.0305947	7.81965
Y56A3A.3	mif-1	-1.97537	0.00584218	9.39629
T19E7.3	bec-1	-1.9754	0.00793162	9.40674
Y71G12B.12	atg-5	-1.97648	0.0221016	8.10105
Y39E4A.3	Y39E4A.3	-1.97957	0.0187632	10.2943
K08H10.4	uda-1	-1.98063	0.00798334	9.70819
F59B2.3	F59B2.3	-1.98277	0.0221889	9.60629
T25G3.4	T25G3.4	-1.98407	0.024246	9.17085
F08F8.7	F08F8.7	-1.98426	0.0096582	9.62569
C30C11.1	C30C11.1	-1.98498	0.03552	8.16168
F53H8.1	apm-3	-1.98546	0.0122076	8.22548
M01H9.3	M01H9.3	-1.98845	0.00919427	8.46837
Y67D2.3	Y67D2.3	-1.99072	0.0261516	9.55059
Y6B3B.5	Y6B3B.5	-1.99338	0.0471888	8.5361
F27D4.1	F27D4.1	-1.99359	0.0150312	10.7117
C36E6.1	C36E6.1	-1.99739	0.00967081	9.05135
T19B4.3	T19B4.3	-1.99878	0.0343429	9.70494
Y22D7AL.7	Y22D7AL.7	-2.00047	0.0399409	8.4524
R06C7.9	ztf-15	-2.00287	0.00587591	7.91851
CD4.2	crn-2	-2.0038	0.0242802	8.12233
F27E5.1	F27E5.1	-2.00469	0.0122943	9.18372
F52E4.1	pccb-1	-2.00537	0.0113292	9.45908
Y38F2AR.1	eri-5	-2.00561	0.020243	7.82131
F59H5.1	F59H5.1	-2.00975	0.0128327	8.31544
C14B9.10	C14B9.10	-2.01124	0.00473932	11.5052
R144.10	R144.10	-2.01236	0.032499	8.08669
F23F1.9	F23F1.9	-2.01272	0.0131962	8.59012
B0391.5	fbxa-153	-2.01283	0.00819221	7.68193
F59H6.9	bath-1	-2.01456	0.0193398	7.99731
R74.4	dnj-16	-2.01589	0.0462767	9.76653
Y49E10.20	scav-3	-2.01753	0.0257412	10.2496
C18B2.4	C18B2.4	-2.019	0.0465557	9.00201
K01H12.2	ant-1.3	-2.01917	0.0101279	9.94845
C27A7.8	C27A7.8	-2.01934	0.0419503	8.03671
T02H6.11	T02H6.11	-2.02066	0.00749128	11.4494
C03B1.12	lmp-1	-2.02094	0.00993472	9.88051
T08B1.3	alh-5	-2.02156	0.013253	8.10592
F21F3.6	F21F3.6	-2.02493	0.0153983	10.1765
F53F10.4	unc-108	-2.02581	0.0159659	9.50724
T10B11.6	T10B11.6	-2.0264	0.0312211	8.37806
C06A5.11	sir-2.4	-2.02854	0.0399248	7.9435
C24A11.8	frm-4	-2.02873	0.00662563	8.43243
F15B10.1	F15B10.1	-2.03094	0.0128567	9.8436
Y41E3.10	eef-1B.2	-2.03407	0.0380261	13.3748
B0464.6	B0464.6	-2.03877	0.027561	8.25297
F53A3.3	rps-22	-2.04199	0.040369	13.2655
Y53G8B.4	nipa-1	-2.04317	0.0417809	7.78132
C03D6.3	cel-1	-2.04753	0.0292371	7.643
T08B2.8	T08B2.8	-2.05063	0.0214372	8.69181
K07B1.6	K07B1.6	-2.05129	0.0059913	10.4317
Y73B6BL.32	lsm-8	-2.05164	0.0063715	7.82334
T05F1.3	rps-19	-2.05179	0.00644227	12.3994
Y37H9A.6	ndx-4	-2.05439	0.0102301	9.62175
ZK652.11	cuc-1	-2.05491	0.0204959	8.87193
Y43F8C.14	ani-3	-2.05529	0.0255038	8.21196
F02E9.2	lin-28	-2.0589	0.0306371	8.1823
T02G5.8	kat-1	-2.0607	0.0199334	10.5507
C05D11.2	vps-16	-2.06118	0.0449489	8.45019
E04A4.4	hoe-1	-2.06175	0.0362391	8.81825
C53A5.1	ril-1	-2.06238	0.0116107	10.7641
F45H10.2	F45H10.2	-2.06439	0.0328603	9.80272
Y48G10A.3	Y48G10A.3	-2.06489	0.00493275	10.5197
F19C6.2	F19C6.2	-2.06768	0.048929	8.11142
C05D11.12	let-721	-2.07002	0.0331863	9.92577
C34E10.6	atp-2	-2.07014	0.00505549	12.074
W07B8.4	W07B8.4	-2.07054	0.0190489	10.051
C09D4.5	rpl-19	-2.07177	0.039397	14.1704
F14F3.3	mboa-7	-2.07204	0.012098	7.90563
F29C4.2	F29C4.2	-2.07328	0.0139512	9.22108
D2096.8	D2096.8	-2.07406	0.0497686	12.1945
F27C1.7	atp-3	-2.07419	0.0152069	11.9009
ZC204.2	ZC204.2	-2.07619	0.0250495	9.53146
C54C6.2	ben-1	-2.07644	0.0291114	10.7377
F26H9.6	rab-5	-2.07644	0.0228052	8.4756
Y65B4A.1	Y65B4A.1	-2.07771	0.0305816	8.58396
C28C12.5	spp-8	-2.07843	0.0140031	10.1096
T07E3.3	T07E3.3	-2.08003	0.0220634	7.80344
E04A4.7	cyc-2.1	-2.08039	0.00793697	12.0326
ZK370.8	ZK370.8	-2.08328	0.0485812	8.94793
Y39E4B.5	Y39E4B.5	-2.0844	0.0313898	7.74044
F25H2.15	F25H2.15	-2.08442	0.0127394	9.84813
ZK637.8	unc-32	-2.08446	0.0126464	8.58788
C15H11.4	dhs-22	-2.0873	0.0153334	10.597
K10C3.6	nhr-49	-2.08876	0.0127502	9.98846
F31C3.9	rrn-3.1	-2.0898	0.00798334	14.2793
K12H4.7	K12H4.7	-2.09235	0.0173703	12.5387
F47B10.1	F47B10.1	-2.09277	0.0201558	9.26632
R155.1	mboa-6	-2.09333	0.0116496	10.2507
C05D2.5	xnd-1	-2.09614	0.0122133	8.27729
T02G5.7	T02G5.7	-2.09714	0.0122846	11.4569
F54C9.3	F54C9.3	-2.09763	0.00494107	10.012
F10E7.6	F10E7.6	-2.099	0.0163531	8.44376
B0336.2	arf-1.2	-2.09983	0.0098361	8.82318
C07A12.4	pdi-2	-2.10168	0.0340417	9.35673
C46F11.5	C46F11.5	-2.10463	0.0315687	9.21561
Y43F4B.7	Y43F4B.7	-2.10495	0.0117891	8.61811
C16C2.3	ocrl-1	-2.10564	0.0129487	8.44741
F38B7.5	duo-1	-2.10623	0.0145368	7.78416
C36B1.12	imp-1	-2.10803	0.0404859	8.26995
F17C11.8	vps-36	-2.10823	0.016232	9.9475
C15F1.7	sod-1	-2.10903	0.00896375	10.7003
ZK792.3	inx-9	-2.11195	0.0050176	8.35348
AC8.6	AC8.6	-2.1132	0.0207	7.96504
Y37E3.8	Y37E3.8	-2.11356	0.00540231	13.5574
F54B3.1	F54B3.1	-2.11633	0.0207324	8.40996
Y47D3A.14	Y47D3A.14	-2.11764	0.0247892	9.67582
B0336.10	rpl-23	-2.11911	0.00969155	13.4885
Y106G6A.2	Y106G6A.2	-2.12095	0.0329895	8.33555
T06G6.9	pfd-3	-2.12136	0.0396652	7.80831
Y47H9C.14	Y47H9C.14	-2.12357	0.0186701	11.5373
Y54E10BL.5	nduf-5	-2.12395	0.00474879	10.0315
C03A3.2	C03A3.2	-2.12558	0.00842343	8.61192
C05D2.1	daf-4	-2.12668	0.0469818	8.46515
C05D11.11	mel-32	-2.12712	0.00544306	11.5896
Y66H1A.2	dpm-1	-2.12777	0.00488875	9.44783
T03F1.12	T03F1.12	-2.12869	0.0200159	7.63119
C50E3.13	C50E3.13	-2.13102	0.0146989	7.95542
C37A2.7	C37A2.7	-2.13286	0.049623	14.1387
B0546.1	mai-2	-2.1331	0.012096	12.0405
T26A8.4	T26A8.4	-2.13351	0.042294	8.08638
R74.8	R74.8	-2.13727	0.0403331	8.97537
T02G6.5	T02G6.5	-2.1386	0.0289873	7.79681
T05C3.5	dnj-19	-2.14002	0.0262931	8.67504
F20H11.1	F20H11.1	-2.14115	0.049657	8.47605
F02E9.10	F02E9.10	-2.14364	0.030683	8.27102
C30G12.6	C30G12.6	-2.14372	0.0135243	8.30939
T27E9.1	ant-1.1	-2.14435	0.003535	12.6346
Y105E8A.16	rps-20	-2.14571	0.00724811	13.5795
F11A10.7	F11A10.7	-2.14618	0.0379688	8.2385
Y110A7A.15	Y110A7A.15	-2.14699	0.0417271	8.78697
M04B2.4	M04B2.4	-2.14786	0.0133681	8.95282
F53H4.1	csb-1	-2.14789	0.0210595	8.45783
K12H4.5	K12H4.5	-2.14819	0.00530659	10.2108
F28B3.7	him-1	-2.14995	0.0120472	8.09385
F56A8.3	F56A8.3	-2.15083	0.00533738	9.7803
F17C11.9	eef-1G	-2.15188	0.0108342	13.0674
F46H6.1	rhi-1	-2.15195	0.00503056	8.32683
C01A2.5	C01A2.5	-2.15294	0.0269911	8.59544
F01D5.4	F01D5.4	-2.15546	0.0419317	8.13594
F35C11.5	F35C11.5	-2.16113	0.0307154	8.52671
K11H12.8	K11H12.8	-2.16176	0.00907463	9.78873
F37C12.3	F37C12.3	-2.16305	0.00387884	9.51043
C28A5.1	C28A5.1	-2.16395	0.0258131	8.37494
M162.10	M162.10	-2.16465	0.0160896	7.56834
R07B7.3	pqn-53	-2.1673	0.032499	10.1476
F56F3.5	rps-1	-2.17034	0.00613964	14.0983
F23H11.5	F23H11.5	-2.17173	0.00379208	10.6597
M04F3.3	M04F3.3	-2.17293	0.014304	8.44546
F26D2.2	syp-1	-2.17473	0.0195556	8.36727
F09F7.7	F09F7.7	-2.17482	0.00640769	8.87072
R05F9.11	R05F9.11	-2.1815	0.0294835	8.05926
F52C6.13	F52C6.13	-2.18384	0.00662563	10.9426
ZK593.6	lgg-2	-2.18601	0.00496747	8.77423
Y69A2AR.18	Y69A2AR.18	-2.18653	0.019402	10.4715
F23C8.5	F23C8.5	-2.18701	0.00423731	10.4404
C47E12.4	pyp-1	-2.18757	0.00425984	12.23
Y39A1A.3	Y39A1A.3	-2.18761	0.0358124	8.67155
K01A11.2	K01A11.2	-2.18768	0.00526351	8.57385
C42C1.11	C42C1.11	-2.18802	0.0188056	9.12794
Y37D8A.14	cco-2	-2.18987	0.00537637	12.3066
F57H12.1	arf-3	-2.19091	0.0100585	11.3155
JC8.4	JC8.4	-2.19113	0.036665	7.53917
F36F2.3	tag-214	-2.19277	0.0102082	8.75878
F26G1.1	F26G1.1	-2.19757	0.028492	8.95989
T24B8.1	rpl-32	-2.19767	0.00648341	12.3293
F11A10.6	F11A10.6	-2.19971	0.0442333	8.93
B0432.2	djr-1.1	-2.20003	0.012096	9.35416
F48C1.2	fbxa-145	-2.20259	0.0392043	7.90209
C01G10.11	unc-76	-2.20598	0.0203888	9.82802
K10B2.4	K10B2.4	-2.2062	0.00903018	8.65822
T04C12.4	act-3	-2.20684	0.00790568	12.471
C34E10.8	C34E10.8	-2.20771	0.0256807	7.95438
C24F3.4	qns-1	-2.2099	0.0386622	8.84882
F44E5.1	F44E5.1	-2.21317	0.00543311	11.5559
Y49E10.2	glrx-5	-2.21662	0.0230741	8.67303
Y54G9A.7	Y54G9A.7	-2.21812	0.0274651	8.8784
ZK632.13	lin-52	-2.22017	0.0203888	8.46412
F26E4.9	cco-1	-2.22155	0.00381601	12.3627
C36A4.9	acs-19	-2.22255	0.00607311	11.359
Y51H7C.1	Y51H7C.1	-2.22255	0.00841226	8.61394
R02D3.2	cogc-8	-2.22298	0.0180981	8.04322
T27E9.2	T27E9.2	-2.22843	0.0373467	10.0766
T21H3.3	cmd-1	-2.22887	0.0159754	8.85324
C26C6.2	goa-1	-2.22922	0.0138674	9.27816
C31C9.2	C31C9.2	-2.23086	0.00484037	8.99453
W10D5.2	nduf-7	-2.23296	0.00714255	8.74193
F18E2.1	F18E2.1	-2.23339	0.00402405	10.4064
C03B8.2	C03B8.2	-2.23421	0.0287383	8.19307
T23H2.5	rab-10	-2.23458	0.00919427	8.82655
C27B7.5	C27B7.5	-2.23479	0.0370762	8.54139
C56C10.10	C56C10.10	-2.23507	0.0344781	8.63519
Y37E11AL.3	Y37E11AL.3	-2.23566	0.00505718	10.2673
ZK637.13	glb-1	-2.23786	0.00586039	9.27414
F54D10.1	skr-15	-2.23891	0.0208021	8.42798
T08G11.1	T08G11.1	-2.23928	0.0446822	9.43931
R06C7.2	R06C7.2	-2.24177	0.00427701	8.02894
ZK686.3	ZK686.3	-2.24201	0.0209397	10.6832
F54D8.2	tag-174	-2.24221	0.00474664	11.9872
F55G1.9	F55G1.9	-2.24516	0.043007	8.2578
K02A11.1	gfi-2	-2.24619	0.0109866	8.42384
K02F3.10	moma-1	-2.24715	0.00429521	9.97746
Y17G7B.7	tpi-1	-2.24737	0.0250491	7.80823
B0365.6	clec-41	-2.24957	0.0175417	8.8718
F20H11.3	mdh-2	-2.25036	0.00776634	11.2759
W02D7.7	sel-9	-2.25323	0.00672009	9.47498
D2096.2	praf-3	-2.25394	0.0101279	8.80726
W01D2.1	W01D2.1	-2.25698	0.0034572	12.4241
M01G5.6	ave-1	-2.25994	0.0125828	7.87791
F09E5.2	F09E5.2	-2.26427	0.00807091	9.35434
R11D1.8	rpl-28	-2.2657	0.0164555	13.9739
Y17G7B.10	Y17G7B.10	-2.26587	0.00489589	9.21964
F19D8.2	F19D8.2	-2.26674	0.0287383	9.02799
B0393.1	rps-0	-2.26724	0.0110525	13.4269
ZC518.3	ccr-4	-2.2687	0.00904047	8.34057
F54C8.5	rheb-1	-2.26916	0.0408386	8.36048
F36F2.4	syx-7	-2.26984	0.0147834	8.9593
Y92H12BR.2	Y92H12BR.2	-2.27211	0.0170303	8.23227
F53G12.10	rpl-7	-2.2724	0.00595904	13.6712
F20D6.4	srp-7	-2.27291	0.00364447	9.99402
B0285.3	B0285.3	-2.27462	0.0437899	8.65295
B0261.2	let-363	-2.27479	0.0381667	8.06561
Y81G3A.3	gcn-2	-2.27556	0.0486873	7.89571
C04H5.7	C04H5.7	-2.27743	0.010185	8.2162
C16A3.9	rps-13	-2.27797	0.0132833	14.2684
R151.3	rpl-6	-2.27955	0.007885	13.6335
F26E4.6	F26E4.6	-2.28419	0.00653818	10.819
ZK353.8	ubxn-4	-2.28692	0.0459324	10.1706
Y55F3AM.12	dcap-1	-2.28801	0.0278253	8.21498
Y53F4B.45	Y53F4B.45	-2.28918	0.0385746	9.19725
Y110A7A.6	Y110A7A.6	-2.29025	0.0051758	9.97755
ZK1058.1	mmcm-1	-2.29038	0.00996864	8.99872
Y57A10A.8	Y57A10A.8	-2.29051	0.0225167	8.32318
F33A8.3	cey-1	-2.29061	0.00353695	11.0314
F46A9.5	skr-1	-2.29117	0.00330698	10.3748
C23H3.5	C23H3.5	-2.29135	0.0280889	8.3237
C04G6.3	pld-1	-2.29171	0.0124922	8.21473
E02H1.1	E02H1.1	-2.29262	0.00698433	9.56066
H24K24.3	H24K24.3	-2.29303	0.047629	11.2572
C14F11.5	hsp-43	-2.29366	0.0297744	8.50255
C54G10.3	pmp-3	-2.29408	0.0127354	9.16785
R08C7.2	R08C7.2	-2.29531	0.00621286	9.13641
W02B12.6	aars-1	-2.29602	0.0317703	8.44041
Y87G2A.18	Y87G2A.18	-2.29828	0.00811672	8.09924
C25H3.7	C25H3.7	-2.2985	0.0178881	9.21241
F10G7.10	F10G7.10	-2.29873	0.00600003	8.54931
F42C5.8	rps-8	-2.29889	0.0450455	14.5195
T23D8.3	T23D8.3	-2.30114	0.00474879	9.45853
ZK682.2	ZK682.2	-2.30699	0.00564631	7.84736
ZK265.2	col-63	-2.30707	0.0483794	13.8129
F56A11.5	F56A11.5	-2.3071	0.0263415	9.72883
T02G5.4	T02G5.4	-2.30781	0.030916	10.9023
C35D10.17	C35D10.17	-2.30796	0.0251439	8.86824
M01A10.3	ostd-1	-2.30852	0.0136661	9.07712
F52D2.4	gei-12	-2.30872	0.0365719	8.25613
R13G10.1	dpy-27	-2.31282	0.0339144	8.00307
K07F5.15	K07F5.15	-2.31386	0.0132725	9.13903
Y113G7B.17	prmt-1	-2.31548	0.0335689	8.03557
T07C4.7	mev-1	-2.31608	0.00477699	9.00371
B0205.8	B0205.8	-2.31654	0.0286768	8.83194
Y110A7A.9	Y110A7A.9	-2.31735	0.0052527	10.0365
Y57G11C.11	coq-3	-2.31738	0.0144195	8.73887
Y47D3A.21	Y47D3A.21	-2.31761	0.0357175	7.79233
F41G4.2	cas-1	-2.31822	0.0241444	8.63222
C03E10.6	clec-222	-2.31915	0.0487144	8.36566
F49E8.3	pam-1	-2.31921	0.00489323	10.5311
T28F2.2	T28F2.2	-2.31964	0.0044632	8.25298
F52F12.7	F52F12.7	-2.31969	0.00887082	10.5918
ZC155.4	ZC155.4	-2.31983	0.00718098	10.6849
T22C1.4	T22C1.4	-2.31984	0.0299259	8.77468
T12B5.15	T12B5.15	-2.32326	0.0123576	8.74416
Y32H12A.2	Y32H12A.2	-2.32385	0.0119365	8.24272
T23G7.3	T23G7.3	-2.3255	0.00594089	10.9878
F01G4.6	F01G4.6	-2.32606	0.00701768	11.2013
Y52B11A.2	Y52B11A.2	-2.32813	0.0303729	8.68397
Y41E3.9	fcd-2	-2.32892	0.0482421	8.40121
F29D10.4	hum-1	-2.32898	0.00783195	9.08019
C24H12.5	C24H12.5	-2.32922	0.0265726	8.32474
C16C8.11	C16C8.11	-2.32927	0.0400384	8.50881
F35G2.2	F35G2.2	-2.32933	0.00907421	8.77165
F46B6.6	F46B6.6	-2.33042	0.0243692	8.84089
F54C9.2	stc-1	-2.3316	0.0196916	9.30826
F58A4.9	F58A4.9	-2.33391	0.0465557	8.32556
D1046.3	D1046.3	-2.33455	0.0130944	7.91912
T06A10.1	mel-46	-2.33584	0.0454985	9.44402
ZK742.1	xpo-1	-2.33592	0.0436338	8.03308
Y54E10A.4	fog-1	-2.33635	0.0332053	7.98028
F44G4.2	F44G4.2	-2.33643	0.0056524	10.5164
F45D3.4	F45D3.4	-2.33893	0.00461498	8.94862
ZK973.10	lpd-5	-2.34048	0.0102082	10.1164
F28D1.7	rps-23	-2.34114	0.0100585	13.3921
ZK546.5	ZK546.5	-2.3413	0.0383943	8.15754
B0205.7	kin-3	-2.34269	0.00664955	9.23408
T04A8.12	tag-189	-2.3437	0.00915584	8.31929
ZK856.8	ZK856.8	-2.34376	0.00499517	10.5264
F22B5.10	F22B5.10	-2.34417	0.0138584	10.2433
Y18H1A.4	Y18H1A.4	-2.34466	0.00518407	8.6339
C06A8.4	skr-17	-2.3447	0.0210135	8.04519
C28H8.4	C28H8.4	-2.34711	0.0187908	9.09855
F45G2.4	F45G2.4	-2.34734	0.00426017	10.2969
R31.2	R31.2	-2.34795	0.0226645	10.2875
T27E9.5	pssy-2	-2.34859	0.00653818	8.34288
B0454.1	lin-8	-2.34891	0.0160716	8.46696
H06I04.4	ubl-1	-2.34893	0.0205034	14.0882
ZC513.4	vars-1	-2.34951	0.0106126	8.03771
F35H12.3	sel-12	-2.35151	0.00793162	8.44804
Y54F10AM.4	ceh-44	-2.35241	0.00550336	9.15975
ZK370.7	ugtp-1	-2.35477	0.00589126	9.20272
C25A1.10	dao-5	-2.35488	0.0174739	8.75951
F58B3.2	lys-5	-2.3556	0.032434	9.99825
Y47D3A.28	Y47D3A.28	-2.35641	0.00983382	8.21425
C10H11.9	let-502	-2.3584	0.00459731	9.07847
B0495.9	B0495.9	-2.35848	0.0422678	9.27766
Y116A8C.28	bca-2	-2.35961	0.00893252	8.48323
Y71A12B.1	rps-6	-2.36007	0.012465	14.0679
C15H11.6	nxf-2	-2.36129	0.0261685	8.67849
F58E10.1	F58E10.1	-2.3615	0.0381123	9.08281
C53B7.3	C53B7.3	-2.36157	0.0212258	9.4102
F43G9.1	F43G9.1	-2.36157	0.0108824	9.87544
R06A4.8	agl-1	-2.36215	0.00538647	9.37456
ZK742.2	ZK742.2	-2.36419	0.00662563	8.34737
R10E4.5	nth-1	-2.36472	0.0109866	8.22783
R151.2	R151.2	-2.3649	0.00481575	9.58347
C37C3.2	C37C3.2	-2.36639	0.037337	11.2757
F45D3.5	sel-1	-2.36706	0.00865743	10.4123
Y39A3CL.4	Y39A3CL.4	-2.36804	0.0192697	9.04224
T01G9.6	kin-10	-2.3682	0.00881762	9.65867
ZC434.2	rps-7	-2.36887	0.00455093	12.7665
F42G8.10	F42G8.10	-2.37014	0.00429272	11.7214
K10C8.1	K10C8.1	-2.37015	0.00662563	8.50176
F11G11.5	F11G11.5	-2.37028	0.00800369	8.9768
Y54H5A.3	tag-262	-2.3712	0.0151852	8.21345
F01F1.15	F01F1.15	-2.37286	0.00979821	8.56965
R03D7.4	R03D7.4	-2.37296	0.0222176	8.32319
C46F11.2	gsr-1	-2.37333	0.00384299	9.36243
C48B4.4	ced-7	-2.3736	0.0256807	8.7575
F52B5.3	F52B5.3	-2.37452	0.0495706	8.26557
T07D3.9	T07D3.9	-2.37598	0.00772751	8.54198
C04F12.4	rpl-14	-2.37681	0.00938268	13.157
F02E9.5	F02E9.5	-2.37996	0.00576023	8.7534
Y55F3BR.1	Y55F3BR.1	-2.37999	0.0252729	7.98141
F40F8.9	lsm-1	-2.38063	0.0216593	9.195
Y54G2A.18	Y54G2A.18	-2.38241	0.00429153	9.4703
C26F1.9	rpl-39	-2.38295	0.0091074	13.4166
F15D3.7	F15D3.7	-2.38327	0.0129686	9.44317
D1007.12	rpl-24.1	-2.38345	0.0208057	14.2091
F58B3.1	lys-4	-2.38438	0.00292978	11.0468
F41C3.4	F41C3.4	-2.38483	0.0480404	9.18998
C11D2.7	C11D2.7	-2.38706	0.0441814	9.09418
Y71F9AL.17	Y71F9AL.17	-2.38791	0.00902479	10.1053
W02B12.11	W02B12.11	-2.38962	0.0441814	9.18569
F32D1.2	F32D1.2	-2.39081	0.00288463	10.8295
Y50D4A.1	Y50D4A.1	-2.39473	0.0439099	8.57228
F53H1.3	F53H1.3	-2.3951	0.0289341	8.63802
F29B9.11	F29B9.11	-2.39521	0.0074349	10.357
F47G4.2	F47G4.2	-2.39533	0.0349707	8.05891
ZK652.4	rpl-35	-2.39582	0.02094	13.3351
T10E9.2	T10E9.2	-2.39632	0.0397158	8.37925
T21D12.3	pqbp-1.1	-2.39798	0.038745	8.75627
F56D1.1	F56D1.1	-2.39801	0.0341766	8.34267
K04G7.4	nuo-4	-2.39808	0.00351858	10.3089
F26H11.5	exl-1	-2.39996	0.0364818	10.3819
C25G4.2	C25G4.2	-2.40013	0.0379688	9.84652
W03F9.5	ttb-1	-2.40099	0.00712765	8.23407
F36F12.8	ztf-28	-2.40152	0.0350033	8.2666
F43E2.7	F43E2.7	-2.40181	0.00640058	10.2732
T21B10.1	T21B10.1	-2.40204	0.00880716	8.43543
W09C3.7	W09C3.7	-2.40334	0.00926961	8.06362
F54D5.12	F54D5.12	-2.40402	0.00737142	9.64574
Y73B6BL.18	smg-3	-2.40445	0.00956995	8.10414
R05F9.9	R05F9.9	-2.40478	0.0385301	8.25133
B0250.1	rpl-2	-2.40556	0.0481404	12.5878
C02B10.2	C02B10.2	-2.40645	0.0385801	8.19894
Y106G6H.2	pab-1	-2.40897	0.012453	11.0792
Y23H5A.7	cars-1	-2.40927	0.00794867	8.63913
R04F11.2	R04F11.2	-2.40928	0.00447863	11.225
C14B9.7	rpl-21	-2.40983	0.0355207	14.3661
F27D4.4	F27D4.4	-2.4102	0.0215572	9.64932
F39H2.4	syp-3	-2.41178	0.0347049	8.72042
R10E12.1	alx-1	-2.4145	0.00874858	9.52582
Y39G10AR.2	zwl-1	-2.41824	0.0215368	8.62457
T14F9.3	hex-1	-2.41985	0.00821351	9.04634
Y119D3B.12	Y119D3B.12	-2.42057	0.0372294	8.70432
ZK1098.4	ZK1098.4	-2.42278	0.0251505	8.80204
K01G5.8	K01G5.8	-2.42292	0.0127245	10.8002
T23F2.5	T23F2.5	-2.42381	0.0332606	8.3731
Y54E2A.8	Y54E2A.8	-2.42408	0.030253	7.66175
Y43F8C.8	Y43F8C.8	-2.42416	0.0361779	8.23086
Y56A3A.21	trap-4	-2.42441	0.00564753	9.31699
F55A11.8	F55A11.8	-2.42465	0.0147463	8.09858
T23F11.1	T23F11.1	-2.4262	0.00842343	8.14475
R13F6.1	kbp-1	-2.42792	0.0185523	7.85743
ZK858.5	ZK858.5	-2.42892	0.0460654	8.36054
T27E9.7	abcf-2	-2.42895	0.00538647	10.9945
K04E7.2	pept-1	-2.42979	0.0260693	8.51133
C01G8.2	cln-3.2	-2.43155	0.00664955	8.75567
F23C8.6	F23C8.6	-2.4326	0.00476385	11.2489
C08C3.2	bath-15	-2.43293	0.0387031	7.80291
K08D12.6	K08D12.6	-2.43826	0.00659726	14.1947
C53H9.1	rpl-27	-2.43948	0.0190657	13.3631
F54E7.1	pst-2	-2.4401	0.0133529	8.47715
Y17G9B.9	Y17G9B.9	-2.44103	0.0393178	8.18706
Y67D2.4	Y67D2.4	-2.44125	0.00950798	7.72848
C09G5.2	dph-2	-2.44425	0.027258	8.7848
ZK1248.13	ZK1248.13	-2.44602	0.0376156	8.91613
F46E10.10	mdh-1	-2.44623	0.00979655	9.7571
K08A2.1	K08A2.1	-2.44722	0.00932028	8.91269
F20D1.2	tbc-1	-2.44809	0.00785221	8.37831
C45E5.6	nhr-46	-2.44847	0.00822377	8.53059
F40F11.1	rps-11	-2.45092	0.00376911	12.3777
ZK1128.5	tag-246	-2.45094	0.0159949	8.35872
F43C1.6	F43C1.6	-2.45153	0.0261496	8.33607
T01H8.1	rskn-1	-2.452	0.0127047	8.68094
C16C10.11	har-1	-2.45529	0.00490825	9.29115
Y57E12AM.1	Y57E12AM.1	-2.4575	0.00348133	8.46655
B0414.7	mtk-1	-2.45778	0.0149952	9.20647
B0491.5	B0491.5	-2.45795	0.00424558	10.1152
F36D4.3	hum-2	-2.45978	0.00624478	8.79125
T05E11.1	rps-5	-2.46005	0.00818288	12.6204
C34B7.2	C34B7.2	-2.46226	0.0199099	9.06323
F59C6.5	F59C6.5	-2.46231	0.00472006	10.5371
F01G4.1	psa-4	-2.46299	0.00772236	9.54022
T06D10.2	T06D10.2	-2.46343	0.036135	8.39669
R12C12.2	ran-5	-2.46518	0.0102975	9.27058
ZC410.7	lpl-1	-2.46587	0.00436357	9.1095
K02F6.7	K02F6.7	-2.46767	0.0361142	8.27196
T27A3.6	T27A3.6	-2.46991	0.0116107	8.40455
C07H6.2	C07H6.2	-2.47232	0.0225678	8.19168
F15D4.3	rmo-1	-2.47244	0.00613649	8.44404
ZC302.2	wdr-5.3	-2.47261	0.0310643	8.55714
R144.11	R144.11	-2.47315	0.00481599	8.0356
F10G7.2	tsn-1	-2.47376	0.0403472	9.02653
F26F4.9	F26F4.9	-2.47412	0.0116107	8.39178
C42C1.13	C42C1.13	-2.47487	0.0350594	8.21706
T08B2.9	fars-1	-2.47612	0.00581326	9.67302
E04D5.1	E04D5.1	-2.47669	0.0453131	9.57281
MTCE.16	MTCE.16	-2.47673	0.0101279	10.0455
C04H5.6	mog-4	-2.47726	0.0434405	8.46553
ZC376.6	ZC376.6	-2.47781	0.00881717	8.29559
ZK1127.11	him-14	-2.47782	0.0242569	8.25667
F59G1.5	ptp-2	-2.47847	0.0381954	8.2341
T10F2.3	ulp-1	-2.47881	0.0110183	8.04252
F56E10.4	rps-27	-2.47931	0.00259993	12.5135
B0491.7	B0491.7	-2.4817	0.007082	8.32507
K04F10.4	bli-4	-2.48186	0.0197381	8.55615
K10C8.3	K10C8.3	-2.48265	0.0179844	8.993
T20H4.3	pars-1	-2.48289	0.00411384	9.39581
K04B12.3	smg-8	-2.48467	0.0100552	8.68541
T07D4.3	rha-1	-2.48594	0.0120472	8.65264
MTCE.11	MTCE.11	-2.48685	0.00643663	11.783
ZK675.1	ptc-1	-2.48717	0.0171073	7.83447
Y17G7B.5	mcm-2	-2.48726	0.00974773	8.13811
W02B12.9	W02B12.9	-2.48795	0.0122152	8.2447
C07H6.8	cux-7	-2.48817	0.00553057	8.09854
Y46G5A.31	gsy-1	-2.48941	0.0138813	10.2258
C28D4.2	cka-1	-2.49069	0.00341013	8.97612
T27E9.3	cdk-5	-2.49137	0.00867264	8.48783
C16A3.5	C16A3.5	-2.49155	0.00323827	11.267
Y63D3A.7	Y63D3A.7	-2.49221	0.00426932	9.68051
T07A9.9	T07A9.9	-2.49291	0.0116107	11.1049
Y71H2AM.11	Y71H2AM.11	-2.49437	0.00364171	9.60876
ZK856.13	tag-315	-2.49462	0.0181652	8.85158
B0035.14	dnj-1	-2.49468	0.0313644	8.97042
Y57G11C.15	Y57G11C.15	-2.49521	0.00484311	9.36188
K07F5.12	K07F5.12	-2.49525	0.00329155	8.47353
K07A12.4	K07A12.4	-2.49534	0.0178644	8.49251
Y43F11A.5	set-24	-2.49556	0.0207324	8.17168
Y66H1A.3	tag-313	-2.49676	0.0182387	8.15861
T05E11.3	T05E11.3	-2.49856	0.00523906	12.1984
Y24D9A.8	Y24D9A.8	-2.50058	0.0088232	11.0121
K02B2.5	rps-25	-2.50089	0.0132725	14.6136
F41C3.5	F41C3.5	-2.50374	0.00354208	11.8535
C09B9.1	C09B9.1	-2.50513	0.0270968	11.0124
C01F6.9	C01F6.9	-2.5055	0.0184387	9.83109
R07B7.2	R07B7.2	-2.50569	0.0088232	8.39233
F58H1.3	F58H1.3	-2.50763	0.00662563	9.40314
T21C9.1	T21C9.1	-2.50766	0.0138674	8.1025
K07A1.8	ile-1	-2.50779	0.01258	9.32271
C24G6.3	mms-19	-2.50994	0.0119128	8.46956
Y39A3CL.1	Y39A3CL.1	-2.51036	0.0284305	8.06987
B0416.4	B0416.4	-2.51046	0.00978776	8.4273
F15D4.2	F15D4.2	-2.51099	0.0120472	9.69051
F13H10.8	F13H10.8	-2.51131	0.00984824	10.2228
C32F10.1	obr-4	-2.51231	0.00801211	9.5197
K09B11.2	nol-9	-2.51408	0.0385719	8.41657
C34C12.3	pph-6	-2.51451	0.0116849	8.25678
K04D7.1	rack-1	-2.51686	0.00633146	13.6972
F58E10.4	aip-1	-2.51689	0.0180486	8.53995
T17E9.2	nmt-1	-2.51725	0.00267775	8.51604
M04B2.3	gfl-1	-2.51774	0.0242725	8.68668
C53A5.17	C53A5.17	-2.51805	0.00538647	8.24468
B0041.4	rpl-4	-2.51861	0.0053385	14.1031
F36A2.9	F36A2.9	-2.51895	0.0177696	8.29646
F27D4.3	F27D4.3	-2.52057	0.00781657	8.43195
ZK829.7	ZK829.7	-2.52058	0.00794494	10.4309
C44B7.10	C44B7.10	-2.52204	0.0104282	11.8711
Y24D9A.4	rpl-7A	-2.52309	0.00878282	13.7985
F10E7.7	rpl-33	-2.52434	0.00538647	13.228
C50D2.9	C50D2.9	-2.52462	0.00694237	8.48481
C42C1.12	C42C1.12	-2.52604	0.0102606	8.49175
B0280.9	B0280.9	-2.52734	0.0134656	8.67975
B0041.3	B0041.3	-2.52856	0.0251596	8.28785
T10H9.4	snb-1	-2.52869	0.00630337	10.5815
Y48E1B.12	csc-1	-2.52889	0.0123576	8.19862
Y38C1AA.11	prdx-6	-2.53159	0.00485771	9.06662
ZK507.6	ZK507.6	-2.53186	0.0158694	8.2194
E04A4.8	rpl-20	-2.53333	0.00274784	13.1218
W09C5.1	W09C5.1	-2.53443	0.0185595	10.041
F52C6.11	bath-2	-2.53514	0.0319616	8.6802
R08E5.2	R08E5.2	-2.53535	0.0030894	8.75214
C49H3.8	arp-11	-2.53543	0.00494107	8.60931
F28C6.7	rpl-26	-2.53598	0.00543363	13.1691
K10C3.5	K10C3.5	-2.53628	0.0483154	8.60094
F17E9.12	his-31	-2.53863	0.0177815	9.00344
C24D10.4	C24D10.4	-2.53874	0.0405751	8.82774
C06A8.5	spdl-1	-2.54103	0.0238211	8.42601
F25B4.6	F25B4.6	-2.5428	0.0426439	8.31103
ZK1127.5	ZK1127.5	-2.54344	0.0201135	8.73308
F11A10.3	mig-32	-2.5448	0.0233887	8.63319
F36A2.6	rps-15	-2.54563	0.00222646	12.7276
B0513.3	rpl-29	-2.54574	0.00281829	12.2182
R107.4	ikke-1	-2.54592	0.0230737	8.64571
C42C1.14	rpl-34	-2.54598	0.00456465	13.2348
F33A8.5	sdhd-1	-2.54632	0.0363268	9.95731
Y24F12A.1	Y24F12A.1	-2.54642	0.0233287	8.54229
F36A2.8	phip-1	-2.54672	0.025318	8.426
F59B8.2	idh-1	-2.54697	0.0169998	11.8973
ZC376.5	trm-1	-2.54739	0.0106209	8.36043
T22C1.10	rbg-2	-2.54768	0.00983382	8.93438
H17B01.4	H17B01.4	-2.54898	0.00518407	9.99272
EEED8.8	ndx-6	-2.54905	0.0151343	8.39661
R102.5	R102.5	-2.54992	0.0135227	10.9095
Y46E12BL.2	Y46E12BL.2	-2.5523	0.00391444	9.19096
T19B4.7	unc-40	-2.5527	0.0362739	8.60735
T28F3.3	hke-4.1	-2.55315	0.00913798	8.51331
R09B3.5	mag-1	-2.55316	0.0208008	9.20986
F09G2.2	F09G2.2	-2.55502	0.00543363	8.80755
F11G11.1	gst-8	-2.55543	0.00305598	9.91821
B0304.2	B0304.2	-2.55578	0.0321338	7.92484
C27A2.2	rpl-22	-2.55632	0.00318217	12.5548
Y75B8A.22	tim-1	-2.55714	0.0230741	8.66003
C36F7.2	C36F7.2	-2.55744	0.0116849	8.2041
T20B12.1	T20B12.1	-2.55839	0.00785558	8.12946
B0024.9	trx-2	-2.55948	0.0308253	9.14292
Y47D3A.4	cku-70	-2.56028	0.021933	8.19595
R53.5	R53.5	-2.56051	0.00325741	9.33813
C04F12.10	fce-1	-2.56315	0.00238181	9.63733
R04D3.2	R04D3.2	-2.56385	0.0251596	8.31098
ZC434.7	ZC434.7	-2.56549	0.0120472	8.79552
T25B9.9	T25B9.9	-2.56717	0.00329155	10.2923
Y48B6A.2	rpl-43	-2.56758	0.00221043	12.721
E02H1.4	pme-2	-2.57093	0.0103404	8.70526
C16C10.7	rnf-5	-2.57176	0.0131404	8.44159
F35F11.1	F35F11.1	-2.57225	0.00736665	8.62376
W09C5.8	W09C5.8	-2.57268	0.00274784	11.4617
T03F1.3	pgk-1	-2.5727	0.0226607	10.7534
Y37D8A.18	Y37D8A.18	-2.57328	0.0269941	8.42293
Y69A2AR.6	Y69A2AR.6	-2.57412	0.0386154	8.43126
Y71F9AM.6	trap-1	-2.57442	0.0052527	11.3185
F25H5.4	eef-2	-2.57462	0.00490825	14.1112
MTCE.31	MTCE.31	-2.57573	0.00518407	13.1603
C13G3.3	pptr-2	-2.57646	0.00732378	8.34368
D2013.8	scp-1	-2.57891	0.0149561	8.69526
R03D7.1	R03D7.1	-2.57941	0.028063	8.59226
T01D1.2	etr-1	-2.58	0.00252002	8.21279
C55B7.9	mdt-18	-2.58002	0.0100796	8.46242
F09E5.8	F09E5.8	-2.58058	0.00615616	8.7145
B0416.5	B0416.5	-2.58061	0.0167946	8.38567
Y59C2A.3	Y59C2A.3	-2.58148	0.0100796	9.52897
Y17G7B.4	Y17G7B.4	-2.58425	0.0117915	8.28657
F57C9.1	F57C9.1	-2.58445	0.0449172	8.39669
K07A1.6	K07A1.6	-2.58522	0.0125683	8.57624
T05G5.8	vps-53	-2.58704	0.00976593	8.22623
T19A6.2	ngp-1	-2.58723	0.00278433	9.91589
ZK829.4	ZK829.4	-2.58728	0.00267775	12.141
T05H10.2	apn-1	-2.5875	0.00749128	8.89366
T07G12.6	zim-1	-2.5876	0.0235239	8.30235
F32E10.1	nol-10	-2.58828	0.0299145	8.65572
F13H10.4	F13H10.4	-2.58863	0.0054182	8.96548
Y39A1A.21	Y39A1A.21	-2.58963	0.0113771	9.10178
T07A9.11	rps-24	-2.58992	0.00323279	12.5273
C50F4.11	mdf-1	-2.5904	0.0210865	8.78105
M01F1.3	M01F1.3	-2.59448	0.0113134	10.3605
T24F1.1	raga-1	-2.59652	0.00808368	9.26855
H29C22.1	H29C22.1	-2.5969	0.0033989	8.57309
C53H9.3	C53H9.3	-2.59771	0.0137381	8.35016
K12C11.2	smo-1	-2.59793	0.0473404	7.82854
F52C9.3	F52C9.3	-2.59989	0.00456996	8.67734
C34B2.2	kbp-5	-2.60224	0.00873777	8.25405
F54H12.6	eef-1B.1	-2.60318	0.00299173	12.7051
T19E7.2	skn-1	-2.60391	0.0154467	8.90477
ZC84.3	cls-3	-2.60448	0.011579	8.03408
F55A12.10	F55A12.10	-2.60498	0.0251128	8.52673
T10C6.14	his-1	-2.60522	0.0212972	10.2127
B0285.4	B0285.4	-2.60801	0.0117082	8.79026
Y45F10B.3	Y45F10B.3	-2.60852	0.0107648	13.4658
T01G9.2	T01G9.2	-2.60863	0.00891623	9.54861
C17H12.13	C17H12.13	-2.60888	0.00636395	9.19579
T04A8.6	T04A8.6	-2.61195	0.00825235	9.52911
T24F1.2	T24F1.2	-2.61305	0.0188729	8.72677
D1007.6	rps-10	-2.61533	0.00258217	12.0747
T23F6.4	rbd-1	-2.61634	0.0122846	8.35301
C05D11.1	C05D11.1	-2.62014	0.0258708	10.0782
K08H10.9	K08H10.9	-2.62068	0.0054863	8.88398
K06H7.3	K06H7.3	-2.62182	0.00225513	9.30044
F30F8.3	F30F8.3	-2.62343	0.0396731	8.67767
C07G3.9	ugt-64	-2.62671	0.0254891	9.4078
Y41D4B.5	rps-28	-2.62913	0.0441123	12.7347
Y39A1C.3	cey-4	-2.62959	0.0067631	11.9864
F22D6.4	nduf-6	-2.6305	0.00919785	10.3308
F59A6.6	rnh-1.0	-2.63353	0.00664955	8.63962
T02G5.12	T02G5.12	-2.63558	0.0396832	8.27457
VF36H2L.1	aph-1	-2.63645	0.0108231	8.79292
Y57A10A.16	Y57A10A.16	-2.63815	0.0111875	8.3809
Y43B11AR.4	rps-4	-2.63838	0.00452885	12.4969
F37C12.9	rps-14	-2.64014	0.0107885	14.6583
Y62F5A.12	Y62F5A.12	-2.64071	0.0172769	8.00498
BE10.6	BE10.6	-2.64141	0.00278433	13.2989
F01G10.1	tkt-1	-2.6435	0.00553057	10.8781
C01G6.6	tag-165	-2.64422	0.0375518	8.28523
C35D10.5	C35D10.5	-2.64458	0.043146	8.20447
ZK1127.4	ZK1127.4	-2.64726	0.0145388	8.93926
T08B2.10	rps-17	-2.64801	0.00219117	11.8127
F42A10.1	abcf-3	-2.64834	0.0123863	9.28035
Y113G7B.16	Y113G7B.16	-2.64947	0.0154148	8.76592
F57F5.5	pkc-1	-2.65036	0.00736635	8.49071
F09F7.3	F09F7.3	-2.65226	0.0240098	8.85404
B0035.5	gspd-1	-2.65304	0.0121642	9.29822
C30F12.4	C30F12.4	-2.65344	0.0044632	8.17433
C26H9A.1	vha-7	-2.65373	0.0067006	8.61252
D1046.2	D1046.2	-2.65502	0.0451943	8.32432
T27F6.5	pars-2	-2.6555	0.0095383	8.18732
Y73E7A.1	Y73E7A.1	-2.65589	0.00352498	9.14569
C04C3.3	C04C3.3	-2.65619	0.00323058	8.75326
M106.8	M106.8	-2.65643	0.0364517	8.28581
F53A2.8	mtm-6	-2.65682	0.00353695	8.70647
T04C12.6	act-1	-2.6575	0.00821351	12.3579
ZK39.6	clec-97	-2.65767	0.0053385	8.70117
C27A12.10	mbd-2	-2.65777	0.0208008	8.15691
Y66D12A.15	Y66D12A.15	-2.6586	0.0363184	8.55601
T21B10.2	enol-1	-2.65872	0.00281597	10.9453
K07E8.7	K07E8.7	-2.65891	0.0441559	8.37811
F42A9.8	F42A9.8	-2.66004	0.0139451	8.83718
F28F8.5	F28F8.5	-2.66038	0.0404859	8.65255
F35H10.5	F35H10.5	-2.66057	0.00977541	8.68534
T19A5.2	gck-1	-2.66067	0.00270778	8.80071
T13B5.8	sut-1	-2.66156	0.0143996	8.5773
F08F1.4	F08F1.4	-2.66285	0.0359686	8.9312
C04A2.7	dnj-5	-2.66288	0.0129634	8.21493
Y95D11A.1	Y95D11A.1	-2.6659	0.0155875	8.43575
F44E2.10	F44E2.10	-2.66642	0.0131344	9.30996
C27C12.7	dpf-2	-2.66738	0.00203594	8.39388
F16A11.2	F16A11.2	-2.66847	0.0421936	8.31023
C42C1.2	C42C1.2	-2.67197	0.0454418	8.80129
F13G3.5	ttx-7	-2.67265	0.0125674	10.388
K07A1.9	K07A1.9	-2.67347	0.00909805	9.604
K07F5.13	npp-1	-2.67371	0.017134	8.53465
Y102E9.2	Y102E9.2	-2.67495	0.0213998	7.87777
Y111B2A.17	elpc-2	-2.67687	0.0105108	8.93979
Y66D12A.16	Y66D12A.16	-2.67958	0.0120318	8.11188
K05C4.2	K05C4.2	-2.67986	0.00233472	8.84878
C32D5.10	C32D5.10	-2.68201	0.0155032	8.45225
Y37H9A.5	Y37H9A.5	-2.68256	0.0032675	9.31798
ZC410.3	ZC410.3	-2.68329	0.0221943	8.7844
F26B1.2	F26B1.2	-2.68393	0.00201161	9.40121
CD4.4	vps-37	-2.68446	0.00613001	9.3869
Y48G1C.9	Y48G1C.9	-2.68506	0.00505356	8.77168
F38A5.1	F38A5.1	-2.68697	0.0182867	9.20535
T12A2.2	T12A2.2	-2.68787	0.0026812	9.17871
Y61A9LA.3	Y61A9LA.3	-2.68816	0.0238554	8.13814
R12E2.13	R12E2.13	-2.68817	0.00305664	9.30699
Y106G6H.3	rpl-30	-2.68825	0.00228523	12.4953
B0361.7	pho-5	-2.6883	0.0408521	8.60158
T10G3.5	eea-1	-2.68856	0.00424558	9.59582
K11D12.2	pqn-51	-2.68891	0.00625294	9.16842
C04F12.5	C04F12.5	-2.68916	0.0203486	8.5236
W09G3.1	W09G3.1	-2.68959	0.00692122	8.82915
W09C5.6	rpl-31	-2.68972	0.00235912	12.9094
W02B12.15	W02B12.15	-2.69013	0.00415142	8.74855
D1037.4	rab-8	-2.69224	0.00391444	8.35913
C48B6.10	C48B6.10	-2.69275	0.00292501	9.17856
F25H2.6	F25H2.6	-2.69283	0.0051283	9.43552
Y54G2A.12	Y54G2A.12	-2.6934	0.0319962	8.44953
Y44E3A.6	Y44E3A.6	-2.69571	0.00436357	9.38407
B0041.2	ain-2	-2.69616	0.00403468	8.36826
F02A9.4	F02A9.4	-2.69635	0.00734071	10.2035
Y53G8AL.2	Y53G8AL.2	-2.69688	0.00330314	10.5655
F25B5.2	F25B5.2	-2.69706	0.00761545	8.77722
Y71F9AR.4	Y71F9AR.4	-2.69976	0.00387884	8.35119
Y43F4B.9	Y43F4B.9	-2.69978	0.00639024	8.79546
Y43F8C.7	Y43F8C.7	-2.70026	0.00760527	8.69309
F46B6.3	smg-4	-2.70044	0.0156325	8.0607
T01C3.6	rps-16	-2.7007	0.0106269	13.8714
F57B9.5	byn-1	-2.7014	0.0117891	8.65755
Y51H4A.15	Y51H4A.15	-2.70241	0.0061583	8.28621
F23H11.4	F23H11.4	-2.70307	0.00933559	8.4336
E01G4.4	pqn-27	-2.70328	0.00396925	9.09351
F56D12.6	F56D12.6	-2.70419	0.0156695	8.98904
T10B5.5	cct-7	-2.70691	0.00664955	8.39416
K01H12.1	dph-3	-2.71122	0.00274784	8.41649
F54E7.9	F54E7.9	-2.71223	0.00618745	8.75004
R07H5.1	prx-14	-2.71254	0.0104075	8.81746
F08B4.7	F08B4.7	-2.71288	0.0281094	8.50588
Y47G6A.21	Y47G6A.21	-2.71372	0.00456465	9.00727
R05G9.3	R05G9.3	-2.71516	0.00244376	7.9635
Y39A3CR.4	ddp-1	-2.71575	0.00853938	8.61648
B0365.1	B0365.1	-2.71737	0.0388073	10.5966
C27A12.2	C27A12.2	-2.71782	0.00940823	8.63948
Y39B6A.3	Y39B6A.3	-2.7179	0.0147463	8.39073
D1086.6	D1086.6	-2.71817	0.00930587	8.28768
ZK632.8	arl-5	-2.71994	0.0339066	8.99792
Y69A2AR.30	mdf-2	-2.72139	0.00223188	10.4578
F22G12.4	F22G12.4	-2.72166	0.00917137	8.05066
F54E7.2	rps-12	-2.72214	0.00503056	13.8129
Y71F9AM.4	cogc-3	-2.72406	0.00407692	8.80399
W08F4.3	W08F4.3	-2.72584	0.0385972	8.1265
F43E2.8	hsp-4	-2.72606	0.0115196	9.29945
T23B12.1	T23B12.1	-2.72724	0.0183508	8.60286
W02F12.5	W02F12.5	-2.7274	0.00539376	11.6991
ZK287.6	ztf-9	-2.72779	0.0424896	8.55749
T25D3.2	T25D3.2	-2.7281	0.0117094	9.1189
F56G4.5	png-1	-2.72847	0.00294378	9.03472
F02E9.7	F02E9.7	-2.72994	0.00558407	9.41417
F38H4.10	F38H4.10	-2.73066	0.0216355	8.08626
Y39B6A.13	Y39B6A.13	-2.73071	0.00643745	9.5394
Y25C1A.7	Y25C1A.7	-2.73365	0.00366819	8.69589
E02H1.6	E02H1.6	-2.73412	0.00676459	8.58848
Y97E10AR.7	Y97E10AR.7	-2.73438	0.00401056	9.17728
F56A6.4	F56A6.4	-2.73557	0.0189637	9.0233
ZK632.10	ZK632.10	-2.73599	0.00800369	9.03043
ZK256.1	pmr-1	-2.73804	0.00353695	9.07206
Y47D9A.1	Y47D9A.1	-2.73839	0.0180981	8.4705
W01B11.3	nol-5	-2.73888	0.0131756	8.91948
Y37A1B.17	Y37A1B.17	-2.7403	0.0100507	8.84429
F30A10.6	sac-1	-2.74065	0.013062	8.80972
F55B11.3	F55B11.3	-2.74311	0.0465406	9.3226
D2030.4	D2030.4	-2.744	0.00640058	10.0701
F22B5.1	evl-20	-2.74408	0.0139577	8.56232
ZC155.7	syn-16	-2.74469	0.0233992	8.51228
ZK973.1	ZK973.1	-2.74481	0.00523905	8.46842
T21C9.5	lpd-9	-2.74526	0.0034572	10.6433
R02D3.3	R02D3.3	-2.7466	0.0387278	8.42659
D2024.6	cap-1	-2.74687	0.00736664	10.5767
C30H6.7	C30H6.7	-2.74743	0.00620862	10.3659
F21G4.2	mrp-4	-2.75145	0.0120962	8.06745
T20D3.5	T20D3.5	-2.75174	0.00493275	8.99563
F40F8.10	rps-9	-2.75245	0.00215753	12.1783
F09E5.3	F09E5.3	-2.7535	0.00429896	9.65714
C18G1.4	pgl-3	-2.75431	0.0172663	8.9295
W10G11.20	dnc-3	-2.75451	0.0150029	8.47448
C47D12.1	trr-1	-2.75478	0.0257037	8.06256
ZK652.2	tomm-7	-2.75517	0.00353695	8.25742
Y47G6A.6	pcaf-1	-2.75518	0.00890127	8.67171
F44E2.9	F44E2.9	-2.75609	0.00499215	8.27877
F29G9.3	aps-1	-2.75711	0.00428548	9.14336
C52D10.9	skr-8	-2.75778	0.0149357	8.42153
C23G10.3	rps-3	-2.75876	0.00278204	12.9984
F57B10.5	F57B10.5	-2.75886	0.0034572	8.8747
C47D12.6	tars-1	-2.75905	0.00997122	9.11419
R173.1	cah-5	-2.76011	0.0129219	8.8438
C15C6.4	C15C6.4	-2.76028	0.0222054	8.32806
C13B4.1	C13B4.1	-2.76043	0.0101764	9.53452
K08F4.9	dhs-12	-2.76066	0.00598185	10.1468
H21P03.1	mbf-1	-2.76081	0.0211589	10.4122
F25H2.11	tct-1	-2.76323	0.00238164	13.4897
Y62E10A.17	Y62E10A.17	-2.7636	0.0319616	8.29891
K02B2.1	K02B2.1	-2.76413	0.0226563	9.20208
T13F2.3	pis-1	-2.76536	0.0182635	8.29938
R11E3.7	dpf-7	-2.7671	0.0305459	8.64261
C06B8.8	rpl-38	-2.76794	0.00191228	11.0453
Y67D8C.5	eel-1	-2.76845	0.00694474	9.19888
F46B6.7	ztf-7	-2.76975	0.00315631	10.1191
C41C4.7	ctns-1	-2.77097	0.00322301	9.31818
Y6D1A.3	Y6D1A.3	-2.77135	0.00681811	8.18541
C06H2.6	C06H2.6	-2.77147	0.0115866	8.27496
ZK809.3	ZK809.3	-2.77258	0.00274784	10.3851
ZK858.4	mel-26	-2.77283	0.0307231	8.52699
W02F12.6	sna-1	-2.77356	0.00979634	9.86294
C34B2.8	C34B2.8	-2.77483	0.00228234	10.2018
Y71F9B.2	Y71F9B.2	-2.77554	0.00638606	9.48792
F26F4.8	F26F4.8	-2.77705	0.0127743	7.83744
Y69A2AR.28	Y69A2AR.28	-2.77728	0.00267513	9.52695
C34E10.1	gop-3	-2.77776	0.00356933	9.1987
Y53F4B.15	asc-1	-2.77784	0.00495131	9.15617
Y116A8C.27	Y116A8C.27	-2.77802	0.0259672	8.89246
T23D8.5	his-67	-2.77941	0.0206502	9.28037
ZK546.17	cblc-1	-2.77944	0.027934	8.62267
T12F5.5	larp-5	-2.77949	0.00664502	9.62013
Y71F9B.3	yop-1	-2.77962	0.0142747	9.22296
M7.1	let-70	-2.78022	0.00520319	10.1713
T09A5.7	T09A5.7	-2.78034	0.0263787	8.35869
C54G6.1	C54G6.1	-2.78175	0.0244276	8.40458
F43G6.9	patr-1	-2.78218	0.00512656	8.37929
R11A8.6	iars-1	-2.78294	0.00921299	9.17718
ZK616.4	ZK616.4	-2.78347	0.00843289	8.93684
T24D1.5	T24D1.5	-2.78363	0.0101279	8.85911
F59G1.8	F59G1.8	-2.78413	0.0118727	8.64497
M117.2	par-5	-2.78441	0.00235912	12.7921
K10B2.1	lin-23	-2.78491	0.00808174	8.94131
W01D2.2	nhr-61	-2.7865	0.0175941	8.73003
VC5.4	mys-1	-2.78661	0.0175893	8.44154
M01F1.4	M01F1.4	-2.78991	0.0123576	8.62131
K11H3.6	K11H3.6	-2.79126	0.0137435	8.68249
W02A11.1	W02A11.1	-2.79129	0.00996489	8.80872
W03G9.8	W03G9.8	-2.79241	0.00732687	8.45015
F19B10.1	F19B10.1	-2.79424	0.0408659	8.07196
C24H12.2	C24H12.2	-2.79457	0.00819221	8.56515
C08F8.9	C08F8.9	-2.79481	0.0338824	8.80185
C29E4.8	let-754	-2.79508	0.00639751	8.858
ZK353.6	lap-1	-2.79518	0.0213028	10.4701
T21E12.4	dhc-1	-2.79627	0.00698351	9.4834
F57B10.4	F57B10.4	-2.79685	0.0228008	8.73491
F44G4.1	F44G4.1	-2.79821	0.0052527	9.1412
C47E8.7	unc-112	-2.79877	0.0166804	8.25099
Y48B6A.13	Y48B6A.13	-2.79916	0.0339066	8.25191
Y48E1B.14	Y48E1B.14	-2.79998	0.0113906	8.50029
F25H2.10	rla-0	-2.80043	0.00569228	13.7987
F45G2.3	exo-1	-2.80055	0.014304	8.45887
C30H6.8	C30H6.8	-2.80061	0.010708	8.89847
R74.7	R74.7	-2.80076	0.00706664	9.00037
C01G10.12	dnj-3	-2.80115	0.0149278	8.1452
F25D1.1	tag-93	-2.80165	0.00544306	10.4439
F55G1.11	his-60	-2.80188	0.00824767	9.73903
F44B9.7	mdt-30	-2.8032	0.00470411	8.59545
Y54E5A.6	Y54E5A.6	-2.80324	0.00392139	8.71506
R05D7.4	R05D7.4	-2.80379	0.0279875	8.9776
R13A5.8	rpl-9	-2.80513	0.00552694	13.5897
C44E4.1	C44E4.1	-2.80554	0.00360159	9.02812
Y40G12A.2	ubh-2	-2.80597	0.0116342	9.15173
K08F4.1	K08F4.1	-2.80605	0.0167361	9.10797
C25H3.9	C25H3.9	-2.80684	0.00902479	10.2145
F52C6.9	bath-6	-2.80708	0.00427701	7.93615
C23H3.3	C23H3.3	-2.80711	0.00280809	8.58199
R144.6	R144.6	-2.80795	0.00374495	8.8445
K07C5.3	K07C5.3	-2.80819	0.00558235	9.14236
F08F8.2	F08F8.2	-2.80873	0.00246262	9.87921
Y47G6A.11	msh-6	-2.80955	0.0416916	8.40706
F02E9.9	F02E9.9	-2.81074	0.00370907	9.4648
R07E5.10	pdcd-2	-2.81088	0.00918892	9.47251
Y37E3.4	moag-4	-2.81101	0.00375819	8.97945
Y97E10AR.5	rpb-9	-2.81164	0.00967377	8.7565
Y116A8C.30	Y116A8C.30	-2.81196	0.00803385	8.93696
C34B2.7	sdha-2	-2.81226	0.0420714	9.28625
ZK1010.1	ubq-2	-2.8132	0.00551628	10.6674
F44E7.9	F44E7.9	-2.81336	0.0117481	8.36092
R06F6.5	npp-19	-2.8137	0.0104703	8.82256
C07G1.3	pct-1	-2.8168	0.0474759	8.06995
C29F7.4	fkh-3	-2.81927	0.0120982	7.78152
C25H3.14	C25H3.14	-2.81983	0.00921992	8.70512
F01F1.10	eng-1	-2.82042	0.00605633	8.76247
Y51H1A.3	Y51H1A.3	-2.82294	0.00538296	10.4807
R166.2	R166.2	-2.82332	0.00738959	9.29813
Y106G6H.8	Y106G6H.8	-2.8239	0.0111223	8.94071
T19A6.1	T19A6.1	-2.82401	0.0255955	8.00882
C44B12.1	C44B12.1	-2.82449	0.00200886	9.08901
C28C12.10	tag-77	-2.82561	0.0124113	8.74177
F54D5.7	F54D5.7	-2.82806	0.00191228	8.59912
Y55F3AM.13	Y55F3AM.13	-2.82961	0.0124388	10.3687
T06E8.1	acl-2	-2.83079	0.0244717	8.5735
JC8.3	rpl-12	-2.83128	0.00197964	12.3209
D2023.4	D2023.4	-2.83129	0.00700968	9.50267
T20D3.7	vps-26	-2.83134	0.0020878	8.41272
F56A3.4	spd-5	-2.83157	0.0359887	8.66642
ZK945.2	pas-7	-2.83206	0.0335506	8.31866
F26E4.11	hrdl-1	-2.83573	0.0159412	8.59398
Y39A1B.3	dpy-28	-2.8368	0.00784925	8.62447
C53D6.4	C53D6.4	-2.83906	0.00919427	8.40381
C45G9.2	C45G9.2	-2.84301	0.0386863	8.79737
F15B10.2	drh-1	-2.84309	0.0104977	8.72648
C29H12.2	C29H12.2	-2.84579	0.00890619	8.51338
ZK1128.1	ZK1128.1	-2.84639	0.0108342	8.54772
F36D4.5	F36D4.5	-2.84643	0.0177159	8.9323
Y39E4B.3	pqn-83	-2.84695	0.0141978	9.60868
W02F12.4	W02F12.4	-2.84838	0.0456924	9.40321
Y38F2AR.9	Y38F2AR.9	-2.84883	0.00244376	11.6182
T16G1.11	eif-3.K	-2.8492	0.00804029	9.20383
R74.6	R74.6	-2.84928	0.0192084	8.15088
Y106G6H.14	Y106G6H.14	-2.85005	0.00494107	8.30026
Y46G5A.17	cpt-1	-2.85013	0.00388716	9.24746
F46B6.12	F46B6.12	-2.85144	0.00622562	9.0711
F59C12.4	F59C12.4	-2.85155	0.0122386	8.43265
ZK1010.2	ZK1010.2	-2.85179	0.00392139	8.53743
W01A8.4	nuo-6	-2.85251	0.00191228	11.0846
Y56A3A.13	nft-1	-2.85412	0.00191228	9.66157
T24H7.1	phb-2	-2.85425	0.0108685	8.90028
T05H10.5	ufd-2	-2.85539	0.0157559	9.04638
F59A6.5	F59A6.5	-2.85542	0.0129883	8.82466
T10B11.3	ztf-4	-2.85557	0.0120732	9.57879
K08F11.6	K08F11.6	-2.85584	0.00244376	10.145
ZK177.5	cyp-44A1	-2.8564	0.00274784	8.98947
K07B1.3	ucp-4	-2.85731	0.00481673	8.78613
F45E4.9	hmg-5	-2.85776	0.00544306	8.80463
C42C1.10	C42C1.10	-2.86029	0.00543511	9.02065
Y62E10A.10	Y62E10A.10	-2.86128	0.00474664	9.4199
C26E6.11	mmab-1	-2.86203	0.00613649	9.10343
K07H8.10	K07H8.10	-2.86219	0.00294796	8.72036
F46C5.8	rer-1	-2.86259	0.0067631	9.10628
Y119D3B.11	Y119D3B.11	-2.86387	0.0116113	8.23846
W03C9.5	W03C9.5	-2.86453	0.014862	8.36286
F54D7.7	F54D7.7	-2.86609	0.0242466	14.0026
C07G1.8	glrx-22	-2.86699	0.00232907	9.36954
W03F9.2	W03F9.2	-2.86827	0.0371319	8.39958
C07G2.3	cct-5	-2.86864	0.00354952	8.88305
F20G4.3	nmy-2	-2.8688	0.00538647	8.53113
W05H7.4	zfp-3	-2.86957	0.0179183	8.23362
F38E11.5	F38E11.5	-2.87043	0.0125823	8.07612
Y69A2AR.3	Y69A2AR.3	-2.87124	0.00329949	9.82243
K01D12.6	K01D12.6	-2.87705	0.00921561	8.42515
T03F1.7	T03F1.7	-2.87826	0.00431076	8.70631
C17G10.4	cdc-14	-2.87841	0.0407417	8.65424
W03F9.10	W03F9.10	-2.88067	0.00581004	8.39881
C14B1.5	dph-1	-2.88266	0.00385475	8.94962
C35B1.2	C35B1.2	-2.88331	0.00769986	8.97441
H43I07.2	H43I07.2	-2.88355	0.0041202	8.51636
C13B9.3	C13B9.3	-2.88407	0.00191228	9.28816
T23B12.3	T23B12.3	-2.88465	0.0215343	8.22868
F57B9.4	coq-2	-2.88529	0.0398353	8.37214
Y102A5C.1	fbxa-206	-2.88754	0.0100585	8.27748
F10D11.2	F10D11.2	-2.88877	0.0331863	8.60894
F40F9.1	xbx-6	-2.88894	0.00626323	10.0842
F21D5.8	F21D5.8	-2.88967	0.0115126	8.70316
R07E5.2	prdx-3	-2.89004	0.0020532	11.175
K04G7.10	rnp-7	-2.89097	0.00208764	9.40012
T09A5.11	ostb-1	-2.89155	0.00864644	10.459
Y110A2AL.14	sqv-2	-2.89177	0.028981	9.35102
F37C12.11	rps-21	-2.89232	0.00250288	12.556
F59G1.1	cgt-3	-2.89483	0.00611899	9.14396
C04D8.1	pac-1	-2.89636	0.00603792	8.61775
R10E11.3	usp-46	-2.89766	0.00481016	8.2198
T06A10.2	T06A10.2	-2.89814	0.00226034	9.65556
B0412.4	rps-29	-2.89821	0.00178964	11.7789
T10H9.5	pmp-5	-2.89892	0.00248813	9.9025
K08F4.2	K08F4.2	-2.89963	0.0396634	8.50269
F25G6.8	F25G6.8	-2.90193	0.00274784	9.3293
K05C4.1	pbs-5	-2.90209	0.0106126	8.99984
C47B2.2	C47B2.2	-2.9025	0.0114378	8.40918
C27B7.2	C27B7.2	-2.90263	0.00573074	8.71555
K08E4.2	K08E4.2	-2.90451	0.0150546	8.75057
K07A12.7	K07A12.7	-2.90451	0.00252002	8.29959
K08C9.7	K08C9.7	-2.90485	0.00391444	10.8102
F32B6.2	F32B6.2	-2.90531	0.0116113	9.64427
ZK593.8	fic-1	-2.90662	0.0117891	8.97065
T23B5.3	T23B5.3	-2.90669	0.00798334	8.17
F32D8.6	emo-1	-2.90748	0.00413439	11.046
Y56A3A.18	Y56A3A.18	-2.90824	0.00203594	9.23322
C07D8.6	C07D8.6	-2.90833	0.00340542	11.9182
Y53F4B.9	Y53F4B.9	-2.90848	0.00265496	8.46321
F45E12.5	F45E12.5	-2.91022	0.00201161	8.99856
T10E9.7	nuo-2	-2.91117	0.00496747	10.1086
Y116A8C.34	cyn-13	-2.91203	0.00224419	10.1436
Y62F5A.1	mdt-8	-2.91274	0.0127966	8.66754
F37B12.3	F37B12.3	-2.91278	0.00529749	9.15274
K03B4.3	taf-10	-2.91322	0.00882051	8.53788
B0205.11	B0205.11	-2.9134	0.00967081	8.87171
C42C1.5	tag-335	-2.9136	0.00945401	8.92213
F43E2.4	haf-2	-2.91384	0.00366819	8.77972
Y77E11A.11	clp-7	-2.91431	0.00704788	9.02928
F33G12.4	lrr-1	-2.91631	0.00841784	8.96643
C01G5.6	C01G5.6	-2.91644	0.0128191	8.16763
ZK20.4	ZK20.4	-2.91876	0.0263807	8.14952
C30C11.4	C30C11.4	-2.91971	0.00701768	8.5167
T20D3.6	T20D3.6	-2.92051	0.0233993	8.465
Y54E10BR.4	Y54E10BR.4	-2.92138	0.0214753	10.1711
F58A4.10	ubc-7	-2.92156	0.00473932	8.76801
F29C4.7	F29C4.7	-2.92175	0.00235769	9.00916
T05F1.1	nra-2	-2.92275	0.00730234	9.95355
T05E11.9	T05E11.9	-2.9234	0.0315533	8.2811
C47B2.4	pbs-2	-2.92442	0.00223391	10.1031
F15B9.10	F15B9.10	-2.92628	0.00374328	9.87567
Y45F10D.4	Y45F10D.4	-2.92813	0.00240981	8.89169
Y71H2AM.1	Y71H2AM.1	-2.92842	0.00222115	8.59448
K08E3.7	pdr-1	-2.92847	0.00350562	9.21159
Y66A7A.2	Y66A7A.2	-2.92852	0.0110183	8.56514
T09B4.10	chn-1	-2.93045	0.00988511	9.57373
C33F10.14	C33F10.14	-2.9305	0.00419217	9.45669
C28H8.12	dnc-2	-2.93127	0.0052527	9.84076
Y73F8A.27	Y73F8A.27	-2.93213	0.00813008	10.572
T07A5.6	unc-69	-2.93251	0.00710649	8.71623
ZK863.4	ZK863.4	-2.93395	0.00305036	8.70259
Y48G8AL.8	rpl-17	-2.9341	0.00325741	11.0836
F42A10.5	F42A10.5	-2.93482	0.00641721	9.34765
T28D9.1	T28D9.1	-2.93483	0.0381283	9.37218
R05G6.7	R05G6.7	-2.93541	0.00224419	11.8383
C38C3.5	unc-60	-2.93556	0.0322221	9.6176
F59B2.7	rab-6.1	-2.9358	0.00527795	10.2037
B0261.4	B0261.4	-2.93601	0.00587591	8.8942
ZK1320.12	taf-8	-2.93707	0.00709695	8.88217
Y39A3CR.1	smi-1	-2.93716	0.00723839	9.19031
T14G10.5	T14G10.5	-2.9386	0.00232726	10.1138
C41G7.6	C41G7.6	-2.9396	0.0119953	12.2295
ZK1320.9	ZK1320.9	-2.94013	0.00376911	9.19909
M106.5	cap-2	-2.94151	0.00532692	8.67894
F56C9.3	F56C9.3	-2.94274	0.0271554	8.3613
Y54E10A.3	Y54E10A.3	-2.94521	0.00567959	9.75217
T20B12.2	tbp-1	-2.94569	0.0428454	8.57922
T20D3.3	T20D3.3	-2.94657	0.00327285	8.89453
T02G5.13	mmaa-1	-2.9466	0.0020736	9.30208
C34G6.7	stam-1	-2.94787	0.00244376	8.85413
ZK856.9	tag-143	-2.94865	0.00432828	9.03176
ZK856.10	ZK856.10	-2.94877	0.0230741	8.56854
C35D10.13	C35D10.13	-2.94877	0.0171497	8.907
F44A2.1	tag-153	-2.94904	0.00415142	8.56997
M70.4	M70.4	-2.9491	0.049163	8.72548
F41C3.3	acs-11	-2.95154	0.00190408	9.22329
B0464.8	tag-342	-2.95293	0.00502625	9.46099
ZK637.2	ZK637.2	-2.95397	0.00333495	9.2133
Y73B6BL.4	Y73B6BL.4	-2.95471	0.0163487	8.4925
Y32H12A.4	Y32H12A.4	-2.95698	0.0101678	9.17907
F32D8.14	F32D8.14	-2.95902	0.00918963	10.6944
C40H1.6	C40H1.6	-2.96183	0.00238185	9.82777
Y48G10A.2	Y48G10A.2	-2.9625	0.00235908	8.42623
Y41E3.7	Y41E3.7	-2.96312	0.00334649	9.19647
T14B4.1	T14B4.1	-2.9641	0.00913353	8.86264
F55B12.3	sel-10	-2.96644	0.00236737	10.0382
F09E5.1	pkc-3	-2.96665	0.0066315	8.95901
C01F6.8	icl-1	-2.96667	0.0155875	8.42124
ZK858.7	ZK858.7	-2.96821	0.0201176	8.89393
C14C10.3	ril-2	-2.97192	0.00264534	9.52919
K07A12.3	asg-1	-2.97251	0.00250235	11.093
C47E12.3	C47E12.3	-2.97293	0.0034715	8.83916
K01C8.6	K01C8.6	-2.97347	0.00436251	8.81765
H01G02.1	H01G02.1	-2.974	0.00217738	8.8261
F22B5.9	fars-3	-2.97562	0.00781657	9.5519
T24C4.5	T24C4.5	-2.97619	0.049623	8.96648
C06H2.7	C06H2.7	-2.97696	0.00187026	8.61338
ZK546.2	ZK546.2	-2.97747	0.00804604	9.31109
F28B3.10	F28B3.10	-2.97884	0.00200825	9.26211
Y47H10A.6	Y47H10A.6	-2.97894	0.00299637	8.43043
T12D8.1	set-16	-2.98085	0.00629408	9.14621
C01F1.1	C01F1.1	-2.98116	0.00996489	8.28661
Y39G10AR.15	Y39G10AR.15	-2.98213	0.00685329	9.08134
T23B3.1	T23B3.1	-2.98256	0.00539771	8.91123
C05C8.1	C05C8.1	-2.98346	0.00354339	9.29707
R05F9.6	R05F9.6	-2.98423	0.00907463	10.7082
F47G9.1	F47G9.1	-2.98473	0.0094224	9.60338
Y49E10.1	rpt-6	-2.98542	0.00191228	9.00662
T05H4.6	T05H4.6a	-2.98587	0.00190395	10.5524
F28F8.9	F28F8.9	-2.98747	0.00296414	8.89889
F02E9.1	F02E9.1	-2.98847	0.00651423	9.56472
C06A6.3	mvb-12	-2.98906	0.00820521	9.88693
F59E12.10	ddl-1	-2.98936	0.00772013	9.17408
T03F1.2	coq-4	-2.98972	0.00834349	8.78671
B0035.15	B0035.15	-2.98991	0.0115931	8.79685
M01A10.1	M01A10.1	-2.9904	0.0088569	8.48323
K03B4.2	K03B4.2	-2.99164	0.00629917	8.57258
C48E7.11	C48E7.11	-2.99204	0.00877372	9.21326
C56C10.9	C56C10.9	-2.99461	0.0067384	8.86132
C25D7.8	otub-1	-2.99718	0.00240393	9.77482
ZK863.7	rnp-1	-2.99776	0.045377	8.41581
K07H8.3	K07H8.3	-2.99911	0.00252002	9.4164
C01A2.3	C01A2.3	-3.00002	0.0392122	8.62308
F23B12.7	F23B12.7	-3.00012	0.0124822	9.61305
C35D10.4	coq-8	-3.00043	0.00723496	8.43301
C41D11.7	eri-7	-3.00055	0.0129878	8.42187
C08F8.1	pfd-1	-3.00203	0.00198353	10.0021
R12E2.1	R12E2.1	-3.00345	0.0104282	10.2215
R04F11.5	R04F11.5	-3.00418	0.00674386	9.23441
F52G2.1	dcap-2	-3.00419	0.00724773	8.47272
T14G10.1	pps-1	-3.00434	0.010674	9.56923
B0280.3	rpia-1	-3.00439	0.00480004	9.22715
F23A7.8	F23A7.8	-3.00517	0.00394919	11.0274
Y14H12B.2	Y14H12B.2	-3.00526	0.00885059	8.35506
Y11D7A.12	flh-1	-3.00564	0.0169102	8.83173
C15H11.7	pas-1	-3.00743	0.0241292	8.95488
T11F9.3	nas-20	-3.00854	0.0336982	8.31212
H35B03.2	H35B03.2	-3.00984	0.0033989	8.52546
T03F1.8	T03F1.8	-3.01004	0.00537637	8.7762
F35G2.1	F35G2.1	-3.01034	0.00668996	9.09272
C05D11.7	C05D11.7	-3.01197	0.00391444	9.98282
F37C12.4	rpl-36	-3.01239	0.00267513	11.8211
F10B5.1	rpl-10	-3.013	0.00178964	11.8491
F53C11.4	F53C11.4	-3.01423	0.00225513	9.80851
ZK809.4	ent-1	-3.01445	0.00210547	8.74078
ZK673.2	ZK673.2	-3.01487	0.00235912	9.27178
ZK180.4	sar-1	-3.01652	0.00470724	8.67273
ZK40.1	acl-9	-3.01726	0.00270416	9.218
Y54E10A.14	rom-5	-3.01948	0.00620202	8.56718
Y106G6H.7	sec-8	-3.01986	0.00176034	9.06478
C56G7.1	mlc-4	-3.02047	0.00271487	10.8826
T13H5.5	T13H5.5	-3.02215	0.00274784	8.69816
C41G7.4	set-32	-3.02252	0.0122846	8.89135
C46A5.6	C46A5.6	-3.02288	0.0103792	8.73941
H26D21.1	hus-1	-3.02338	0.00530624	8.28112
K04G2.5	ath-1	-3.02354	0.0026958	9.15742
Y47G6A.33	Y47G6A.33	-3.02401	0.00189706	9.07588
W08E12.3	W08E12.3	-3.02413	0.0100901	9.51183
W09H1.5	mecr-1	-3.02673	0.00554037	9.19195
C27H6.8	C27H6.8	-3.02732	0.00425984	9.16694
VW02B12L.3	ebp-2	-3.02737	0.0035834	9.05084
Y59A8A.1	csn-1	-3.02976	0.01605	8.86464
T23B12.7	dnj-22	-3.03014	0.00800369	9.70688
Y57G11C.16	rps-18	-3.0302	0.00930587	11.3759
Y102E9.1	odr-4	-3.03307	0.00247978	9.95199
C01G5.8	fan-1	-3.03346	0.0290758	8.15309
T07F10.3	T07F10.3	-3.03383	0.00992907	8.28816
R06A4.7	mes-2	-3.03407	0.00651423	8.20957
T12G3.4	T12G3.4	-3.03485	0.00280548	8.99868
C49H3.11	rps-2	-3.03504	0.00178706	13.1304
VF13D12L.1	VF13D12L.1	-3.03509	0.012258	10.0282
ZK1128.8	vps-29	-3.03527	0.00580026	8.68664
Y54E10A.5	dnc-6	-3.03585	0.0159725	8.17343
F01F1.8	cct-6	-3.03611	0.00972994	8.98698
F42G8.12	isp-1	-3.03625	0.00292978	9.89265
C50F4.16	C50F4.16	-3.0373	0.0184746	8.97535
B0205.6	B0205.6	-3.0379	0.0025875	8.85504
F53F4.10	F53F4.10	-3.03815	0.00435511	12.0057
F19B10.2	F19B10.2	-3.03845	0.00551911	8.6069
B0261.1	B0261.1	-3.03862	0.00305664	8.75511
Y110A2AR.1	Y110A2AR.1	-3.0387	0.00873118	8.82669
Y48B6A.14	hmg-1.1	-3.03902	0.00745009	9.85874
ZK20.5	rpn-12	-3.03915	0.00651423	10.1525
Y105E8B.3	riok-2	-3.03954	0.00637344	9.24376
ZK973.11	ZK973.11	-3.04273	0.0112328	8.90709
Y25C1A.8	Y25C1A.8	-3.04384	0.0368243	8.07824
C16A3.8	thoc-2	-3.04423	0.0128567	8.78969
T24C4.1	ucr-2.3	-3.04449	0.0115075	8.98921
M04B2.1	mep-1	-3.04616	0.00220167	8.7041
F27C1.6	F27C1.6	-3.04641	0.00930587	8.63044
T13H2.4	pqn-65	-3.04805	0.019041	8.90169
C17G10.9	C17G10.9	-3.04877	0.0096582	8.70154
Y73B6BL.33	hrpf-2	-3.04928	0.0166871	9.24823
T19C3.8	fem-2	-3.05203	0.0119652	8.52537
ZK1098.1	ZK1098.1	-3.05502	0.00263029	9.17552
C34B2.5	C34B2.5	-3.05513	0.00364171	9.40749
F52B11.2	F52B11.2	-3.05615	0.00370851	9.35329
R02F2.4	R02F2.4	-3.05723	0.00676459	9.35442
C01A2.4	C01A2.4	-3.05876	0.00643663	8.89411
Y71H2AM.24	Y71H2AM.24	-3.05933	0.0250335	8.98138
T14G10.7	T14G10.7	-3.05945	0.00429323	9.05179
C25A1.7	iars-2	-3.05954	0.0203895	8.81678
F35D11.4	F35D11.4	-3.06078	0.00794494	9.08064
H06H21.11	H06H21.11	-3.06366	0.00215836	9.12085
Y71G12B.24	mppa-1	-3.06477	0.00175489	8.73473
ZK616.6	ZK616.6	-3.06499	0.00222115	8.72447
Y106G6H.6	Y106G6H.6	-3.06957	0.0120163	8.78585
F38A5.13	dnj-11	-3.0698	0.00279869	8.50336
W01D2.5	W01D2.5	-3.07166	0.0127966	8.93305
F13B10.2	rpl-3	-3.07248	0.00387884	11.6081
F26F4.10	rars-1	-3.07521	0.00241164	10.1467
F54C9.6	bcs-1	-3.07555	0.00619428	8.51081
F18C5.2	wrn-1	-3.07782	0.0437845	8.39727
ZK643.2	ZK643.2	-3.07844	0.0258602	8.72088
C52E4.4	rpt-1	-3.08103	0.00292978	10.838
E02A10.1	mrps-5	-3.08117	0.00499517	8.87124
C18D11.4	rsp-8	-3.08153	0.00429896	9.19489
Y77E11A.13	npp-20	-3.08422	0.00538296	8.75318
K12D12.2	npp-3	-3.08492	0.0120472	9.03527
K08E3.5	K08E3.5	-3.08518	0.0104811	10.711
ZK180.3	ZK180.3	-3.08605	0.0103404	8.81047
R07E5.7	R07E5.7	-3.0865	0.00442736	9.04259
T22C1.3	T22C1.3	-3.08707	0.0100108	8.5401
F27C8.4	spp-18	-3.08841	0.00413439	8.78814
C50F4.14	C50F4.14	-3.08885	0.00274784	9.34731
T24D1.3	T24D1.3	-3.09043	0.0419317	9.33383
C25H3.6	mdt-26	-3.09068	0.0124353	8.48131
C14C10.4	C14C10.4	-3.09128	0.00604611	8.62069
F58G11.1	letm-1	-3.09404	0.00378091	9.59544
F55F8.4	cir-1	-3.09421	0.00267775	9.78911
Y51H7C.6	cogc-4	-3.09455	0.00471735	9.11732
M02B1.3	M02B1.3	-3.09806	0.00473932	8.63864
C27F2.5	vps-22	-3.09898	0.00420697	9.74597
C11D2.4	C11D2.4	-3.10008	0.00753241	9.58866
B0244.8	egg-1	-3.10149	0.00788856	8.66494
C17G10.2	C17G10.2	-3.10177	0.00441717	8.74257
C50B8.3	C50B8.3	-3.10181	0.00466588	9.37378
C14A4.2	dap-3	-3.1041	0.00334755	9.39504
Y38A10A.7	Y38A10A.7	-3.10449	0.0233745	9.03462
C04G6.4	C04G6.4	-3.10529	0.00969504	9.09316
C16A3.6	C16A3.6	-3.1053	0.0233524	10.4223
F58F6.4	rfc-2	-3.10578	0.00715307	8.35515
T11F8.1	T11F8.1	-3.10582	0.00619623	8.01974
Y41E3.4	qars-1	-3.10669	0.00344401	9.31758
C44B9.5	com-1	-3.10678	0.00668651	9.00757
K10C3.2	K10C3.2	-3.10758	0.00284137	9.21305
F28C6.8	F28C6.8	-3.10897	0.00572244	8.95807
F25H2.8	ubc-25	-3.11214	0.00333065	9.78747
R09B3.4	ubc-12	-3.11353	0.00890127	8.86159
K08E3.4	K08E3.4	-3.11394	0.00266073	9.28844
Y71G12B.10	Y71G12B.10	-3.11412	0.00291857	9.85527
F42A6.7	hrp-1	-3.11536	0.00305664	9.582
Y71F9B.16	dnj-30	-3.11626	0.0127025	9.31913
R02D3.8	R02D3.8	-3.11642	0.0301825	9.99448
T20D3.8	T20D3.8	-3.11804	0.0441814	8.84624
Y37E3.1	Y37E3.1	-3.11879	0.0122846	8.62103
Y92H12BR.8	Y92H12BR.8	-3.11887	0.00461933	9.38554
F30A10.9	F30A10.9	-3.11906	0.00237902	9.31104
ZK863.6	dpy-30	-3.12098	0.00175621	9.36573
C36E8.5	tbb-2	-3.12215	0.00209417	12.5718
C08B6.8	C08B6.8	-3.12254	0.00292978	8.66206
ZK1098.2	ZK1098.2	-3.12256	0.0298522	8.69229
Y53C12B.1	Y53C12B.1	-3.1229	0.0176036	9.06162
T01D3.5	T01D3.5	-3.12341	0.00209925	10.7734
F01F1.11	F01F1.11	-3.12519	0.0418385	8.64887
B0495.2	B0495.2	-3.12603	0.00291885	9.88961
F14E5.2	F14E5.2	-3.12638	0.00447462	8.74658
ZK353.7	cutc-1	-3.12815	0.00807841	8.84722
Y48A6B.11	rsa-2	-3.12957	0.00381253	8.48778
Y71F9AL.13	rpl-1	-3.12967	0.00353348	10.5721
D1037.1	D1037.1	-3.12988	0.00388097	8.69895
F41E6.9	F41E6.9	-3.13022	0.00429896	10.1711
R10H10.1	lpd-8	-3.13159	0.0039194	8.86112
F42A8.2	sdhb-1	-3.1317	0.00260119	9.85466
K04G2.3	cdc-48.3	-3.13268	0.027561	8.83021
F53F10.5	npp-11	-3.13361	0.00294363	8.87156
ZK1248.14	fzo-1	-3.13468	0.00715307	9.44732
T03F6.2	dnj-17	-3.13528	0.00477368	9.33628
F59A6.12	F59A6.12	-3.13543	0.0191023	8.26677
Y32H12A.7	Y32H12A.7	-3.13546	0.00427763	9.01907
C16C8.14	C16C8.14	-3.13584	0.00384299	8.6865
C03D6.8	rpl-24.2	-3.13604	0.00331778	9.4019
T24B8.5	T24B8.5	-3.13704	0.00531854	10.0231
C18F10.7	C18F10.7	-3.13772	0.00274784	8.69797
Y57E12AL.1	Y57E12AL.1	-3.13789	0.00452885	10.8281
F54C9.5	rpl-5	-3.13789	0.00699103	10.2681
F26A3.1	F26A3.1	-3.13965	0.00677219	9.44045
R12C12.6	R12C12.6	-3.13983	0.00237926	9.27872
ZC434.4	ZC434.4	-3.14076	0.00281829	8.80092
Y41D4B.11	Y41D4B.11	-3.14121	0.0233992	8.9285
F21H12.6	F21H12.6	-3.14151	0.0053385	9.44121
M7.5	atg-7	-3.14158	0.00491497	8.94326
R151.7	R151.7	-3.14181	0.00935863	9.19966
C03B8.4	lin-13	-3.14262	0.00550336	9.52648
M01E11.2	M01E11.2	-3.14302	0.00558235	8.76355
T09A5.9	T09A5.9	-3.14413	0.0020878	10.1759
T15H9.2	T15H9.2	-3.14467	0.0376011	8.93666
F37F2.2	F37F2.2	-3.1457	0.00289681	11.4971
B0564.7	B0564.7	-3.14596	0.00421378	8.5576
C16C10.10	glod-4	-3.15094	0.00474153	9.38054
F09E5.17	bmy-1	-3.15176	0.00238164	10.1884
T05H4.5	T05H4.5	-3.15379	0.0185107	11.7364
C32D5.5	set-4	-3.15547	0.0107885	9.20169
F56B3.8	F56B3.8	-3.15589	0.00305664	9.01671
F11G11.7	dnj-9	-3.15908	0.00329388	9.00738
C36B1.14	C36B1.14	-3.15995	0.0103404	8.03906
R08C7.10	wapl-1	-3.16199	0.00362804	8.68464
F07A11.3	npp-5	-3.16201	0.0060992	8.79772
F57B10.10	dad-1	-3.16232	0.00611587	10.2587
C27H5.3	fust-1	-3.16345	0.00210547	8.8497
T27F2.1	skp-1	-3.16359	0.00187026	9.45982
C01F1.2	sco-1	-3.16701	0.00521217	8.55838
T22H9.1	T22H9.1	-3.16712	0.00435868	8.63125
C05D9.7	C05D9.7	-3.16743	0.0392601	7.964
C29A12.1	C29A12.1	-3.16756	0.00191228	9.27369
Y48G10A.7	rpr-1	-3.16765	0.00481245	9.13456
Y54E10A.6	Y54E10A.6	-3.16829	0.027258	8.16333
C41H7.6	C41H7.6	-3.16873	0.00506484	9.85101
ZK430.7	ZK430.7	-3.16973	0.00424377	9.33769
Y49F6B.4	smu-2	-3.17158	0.00352498	8.63004
Y65B4BR.8	Y65B4BR.8	-3.17426	0.00685335	8.5683
F59E12.13	fut-3	-3.17484	0.0107799	8.4648
C41G7.9	C41G7.9	-3.17725	0.0111672	10.745
F55G1.2	his-59	-3.17727	0.00387884	8.97815
T10H9.3	syx-18	-3.17804	0.00456465	9.12381
Y39A1C.2	oxi-1	-3.17861	0.00178964	9.59544
F55A11.3	sel-11	-3.17928	0.00180609	9.70756
R53.1	R53.1	-3.18177	0.0116651	9.82618
C33H5.8	C33H5.8	-3.18438	0.00474879	8.83349
Y42G9A.6	wht-7	-3.18501	0.00391444	9.09452
R08D7.1	R08D7.1	-3.18592	0.0284684	9.28959
C55B7.5	uri-1	-3.18726	0.00309902	9.72132
F32E10.4	ima-3	-3.18869	0.00705754	8.98937
C44B7.2	C44B7.2	-3.19015	0.00692601	8.38017
F52H3.2	F52H3.2	-3.19183	0.00367365	8.49798
T04A11.6	him-6	-3.19431	0.00221243	9.07791
T04D3.5	T04D3.5	-3.19647	0.0233745	8.64777
D2045.2	D2045.2	-3.1981	0.00212512	10.139
T28D9.4	T28D9.4	-3.19906	0.0244717	8.35869
F39H11.3	cdk-8	-3.19978	0.00216892	9.05552
Y76B12C.7	cpsf-1	-3.19979	0.00881639	8.49734
C56G2.7	C56G2.7	-3.1999	0.00363911	10.4301
W02D9.6	W02D9.6	-3.20095	0.0047509	8.50477
F21H11.2	sax-2	-3.20125	0.00811672	9.551
K07A12.1	K07A12.1	-3.20164	0.00176034	9.43969
R02F2.9	R02F2.9	-3.20201	0.00651423	8.67049
K07D4.3	rpn-11	-3.20212	0.00457036	9.65818
C17G1.2	C17G1.2	-3.2023	0.0106132	9.31056
Y75B12B.2	cyn-7	-3.20336	0.00280668	10.7539
D2013.7	eif-3.F	-3.20398	0.00164812	9.34394
D1022.1	ubc-6	-3.20495	0.00593516	8.70039
H15N14.2	nsf-1	-3.20509	0.00154149	9.34853
T20B12.7	T20B12.7	-3.20618	0.00539904	9.45096
T24B8.2	T24B8.2	-3.20794	0.0273407	9.48533
C07E3.2	pro-2	-3.20852	0.00840641	9.39
F09E5.11	F09E5.11	-3.20927	0.0164148	9.21797
Y48A5A.3	Y48A5A.3	-3.20937	0.00212463	8.64774
W09D10.3	W09D10.3	-3.21095	0.00519928	8.95312
K08E3.10	K08E3.10	-3.2118	0.00326754	9.02176
Y62E10A.2	Y62E10A.2	-3.2129	0.00654205	10.4193
F11E6.7	F11E6.7	-3.21386	0.0341877	8.5889
M18.3	M18.3	-3.2139	0.00694237	9.08855
Y87G2A.9	ubc-14	-3.21393	0.00508372	10.0103
F31C3.4	F31C3.4	-3.21589	0.00256397	8.64028
T13C2.4	ssup-72	-3.21748	0.00525927	8.39334
ZK418.5	ZK418.5	-3.21749	0.00328524	9.55477
F56C11.3	F56C11.3	-3.21908	0.00413439	8.85943
C18E3.6	cas-2	-3.21983	0.0182222	9.24123
Y59A8B.10	Y59A8B.10	-3.21992	0.01204	9.10399
C07H6.4	C07H6.4	-3.2203	0.00508586	8.9705
F39B2.6	rps-26	-3.22042	0.0447073	11.1716
F52C12.6	F52C12.6	-3.22114	0.00308966	9.24177
F21C3.3	hint-1	-3.22223	0.00644413	9.11168
F09E5.15	prdx-2	-3.22354	0.00271247	10.9621
F10C5.2	F10C5.2	-3.22574	0.0201261	8.16773
Y62E10A.15	cyp-31A5	-3.22582	0.0223481	8.23907
F17C11.10	F17C11.10	-3.22612	0.0155875	8.90522
Y110A7A.11	use-1	-3.22721	0.0034572	8.77567
C30B5.2	C30B5.2	-3.22727	0.00191998	8.80733
Y73B6BL.30	Y73B6BL.30	-3.22849	0.00490825	8.68779
Y62E10A.8	mau-8	-3.2292	0.0128961	8.73952
ZK524.4	ZK524.4	-3.23048	0.00237547	8.56411
K03A1.1	his-40	-3.23108	0.00305664	9.34008
C18E9.4	C18E9.4	-3.23299	0.020017	9.311
Y52E8A.2	Y52E8A.2	-3.23305	0.0229787	8.73516
Y24F12A.2	ragc-1	-3.23331	0.0026105	10.4374
F28H1.3	aars-2	-3.23448	0.0020878	9.71155
F23B12.8	bmk-1	-3.23463	0.00493275	9.20668
C16C2.4	C16C2.4	-3.2351	0.0110469	9.29848
B0019.2	B0019.2	-3.2377	0.00266773	8.96331
F25B4.7	F25B4.7	-3.23783	0.0020878	9.33293
F27C1.2	F27C1.2	-3.23897	0.00387884	10.9485
F44G4.3	F44G4.3	-3.23942	0.0248717	8.4002
M03D4.1	zen-4	-3.23949	0.0123191	8.56082
F21D5.6	F21D5.6	-3.24029	0.00644227	8.47911
Y37E3.9	phb-1	-3.24123	0.00191228	10.4058
Y73B6BL.5	seu-1	-3.2413	0.00613001	8.73057
ZK546.13	mdt-4	-3.24258	0.00568532	9.57949
K01G5.2	hpl-2	-3.24404	0.00248925	8.66818
H14A12.3	H14A12.3	-3.24418	0.00175489	8.71996
ZK829.6	tgt-1	-3.24494	0.00771695	8.75344
Y54H5A.2	Y54H5A.2	-3.24573	0.00366058	9.50234
F54F2.9	F54F2.9	-3.24591	0.00274784	9.23369
F31C3.11	rrn-2.1	-3.24655	0.00175489	10.5049
ZK328.5	npp-10	-3.24671	0.00479726	9.09692
W02B12.2	rsp-2	-3.24702	0.00175489	10.8258
F43E2.5	msra-1	-3.24775	0.00929065	10.2951
D2096.4	sqv-1	-3.24841	0.00224419	9.10897
T27F6.7	T27F6.7	-3.2488	0.00915584	8.5894
F19F10.9	F19F10.9	-3.24898	0.00557932	9.29784
T05E11.4	spo-11	-3.25126	0.00224419	8.70254
F10G8.6	F10G8.6	-3.25145	0.00224418	10.0371
T26A8.1	T26A8.1	-3.25181	0.00347432	8.84288
F59H6.11	bath-5	-3.25278	0.0399095	8.44099
Y69A2AR.21	Y69A2AR.21	-3.25293	0.00681917	9.3767
F10D11.1	sod-2	-3.25393	0.00165036	9.84317
ZK121.1	glrx-21	-3.2557	0.00558235	8.7832
C05C10.7	C05C10.7	-3.25817	0.0139201	8.30256
M18.7	aly-3	-3.2582	0.00326907	10.9544
F29B9.2	F29B9.2	-3.25901	0.0025875	9.25008
C33H5.11	imp-3	-3.25909	0.0095007	8.2469
C16A3.7	tag-182	-3.25966	0.00558235	9.25277
Y38A10A.6	Y38A10A.6	-3.26072	0.0115196	8.86103
K09E4.3	K09E4.3	-3.26341	0.00436251	8.52526
F25B5.4	ubq-1	-3.26436	0.00598185	12.8137
F43G9.13	F43G9.13	-3.26458	0.00211343	8.72394
Y73B6BL.3	exos-2	-3.26464	0.00705383	8.46176
Y43C5A.5	thk-1	-3.26485	0.00222115	8.95176
T07A9.8	T07A9.8	-3.26588	0.00808174	8.42163
W04D2.5	W04D2.5	-3.26672	0.00148787	10.4895
M88.5	M88.5	-3.26772	0.00252002	9.76141
K11H12.2	rpl-15	-3.26797	0.00176034	8.56335
F10E9.3	F10E9.3	-3.26838	0.00378091	9.39975
W02B12.8	rga-1	-3.26901	0.00182985	9.39667
C23G10.8	C23G10.8	-3.26984	0.00230028	9.14906
F40F8.1	F40F8.1	-3.27039	0.00248813	9.97613
R13A5.12	lpd-7	-3.27163	0.00272134	9.67007
H27M09.1	H27M09.1	-3.2732	0.00903018	9.13569
C50D2.5	C50D2.5	-3.2734	0.00236862	9.31152
T27E9.4	kel-3	-3.27375	0.00191228	9.49466
C18F3.4	nsy-7	-3.27459	0.0431657	8.16727
F10E7.5	F10E7.5	-3.27496	0.0220591	9.04728
F26F4.13	kbp-2	-3.27642	0.0138584	8.17244
C42C1.15	erl-1	-3.27677	0.00407692	8.66802
C30H6.9	C30H6.9	-3.277	0.00722161	9.05514
B0361.8	B0361.8	-3.27779	0.00194373	9.82873
R05H5.4	R05H5.4	-3.27804	0.0199684	8.44355
C32E8.2	rpl-13	-3.28112	0.00545441	10.6147
F15H10.3	apc-10	-3.28128	0.0222076	8.84216
C18E3.5	C18E3.5	-3.2824	0.0142822	8.75244
Y39A1A.6	Y39A1A.6	-3.28299	0.0122764	8.95666
K07B1.5	acl-14	-3.28531	0.00252002	9.35595
C09H10.3	nuo-1	-3.28591	0.00299637	10.6527
Y111B2A.18	rsp-3	-3.28674	0.0030894	9.55648
F26H11.6	F26H11.6	-3.2926	0.0260378	8.94085
C26F1.4	rps-30	-3.29287	0.00558931	10.7626
F18A1.6	F18A1.6	-3.29441	0.00297341	8.36645
Y62E10A.12	lsm-3	-3.29478	0.00890127	8.82374
T09B4.9	T09B4.9	-3.29773	0.00926028	8.61746
T10C6.5	T10C6.5	-3.29834	0.0136855	9.56095
F26F12.7	let-418	-3.29871	0.00148787	10.348
F22B3.1	his-64	-3.30218	0.00491843	9.03588
F45G2.10	F45G2.10	-3.30353	0.0132982	8.44128
F40G9.11	mxl-2	-3.30466	0.00391965	9.56577
K01C8.7	K01C8.7	-3.30556	0.0190657	8.8069
Y73B6BL.23	Y73B6BL.23	-3.30666	0.00463359	8.48784
T12D8.8	hip-1	-3.30677	0.00256807	8.87194
H06H21.3	eif-1.A	-3.30807	0.00315631	9.69411
T08D2.3	T08D2.3	-3.30865	0.0120472	8.22818
T21C9.13	T21C9.13	-3.31133	0.00240981	10.5711
F53B7.3	F53B7.3	-3.31208	0.0030894	8.83421
C44H4.7	eor-2	-3.31359	0.0148113	8.99828
D2030.1	D2030.1	-3.31399	0.00868455	9.46345
R03G5.1	eef-1A.2	-3.31404	0.00271487	13.3833
T04A8.10	sel-13	-3.31416	0.00251222	9.19424
F35H10.6	F35H10.6	-3.31444	0.00329982	9.01655
C54C6.1	rpl-37	-3.31444	0.00203594	12.3615
JC8.2	JC8.2	-3.31593	0.00212302	10.1541
F22D6.3	nars-1	-3.31657	0.0121981	9.29635
T28D6.6	T28D6.6	-3.31817	0.0067631	9.45427
C18E9.11	ooc-5	-3.31882	0.00418484	9.33578
C10C6.5	wht-2	-3.31902	0.00363911	9.26708
C09G4.5	mes-6	-3.32044	0.00188631	9.39626
K10H10.2	K10H10.2	-3.32106	0.00281597	9.08321
Y46G5A.12	vps-2	-3.32158	0.00570717	10.6447
T07C4.1	umps-1	-3.32172	0.00682596	8.88648
F55B12.4	F55B12.4	-3.3229	0.00312606	9.00839
D1007.8	D1007.8	-3.32393	0.00824456	8.54889
T25G3.3	T25G3.3	-3.32403	0.00148499	9.54638
T06D8.5	T06D8.5	-3.32406	0.00217738	9.58328
C39E9.14	dli-1	-3.3248	0.00238164	10.0461
F07D3.2	flp-6	-3.32549	0.00571196	9.06922
T12G3.8	bre-5	-3.32585	0.00178706	8.9661
Y54E5A.4	npp-4	-3.32602	0.00235769	8.9808
B0207.4	air-2	-3.32609	0.00626514	8.45494
K06H7.9	idi-1	-3.32697	0.00972564	9.08142
C18E3.7	ppw-1	-3.32697	0.00376116	11.0383
F55F8.5	tag-345	-3.3277	0.00758678	9.08151
C14C6.5	C14C6.5	-3.33	0.00274784	8.98823
C56C10.1	vps-33.2	-3.3309	0.00782913	8.86408
C12D8.1	C12D8.1	-3.33116	0.00182669	10.1943
C24B5.2	spas-1	-3.33347	0.00878605	9.9243
C08B11.5	sap-49	-3.33712	0.00860988	8.69534
M01F1.6	M01F1.6	-3.33712	0.00890619	8.19585
F58E10.3	F58E10.3	-3.33935	0.00164812	10.0161
Y48G1C.4	pgs-1	-3.33989	0.0025875	8.81807
K06A5.6	acdh-3	-3.33995	0.00281829	10.8785
W04A8.1	W04A8.1	-3.34048	0.00729555	8.35863
C16C8.5	C16C8.5	-3.34132	0.00578577	8.23713
B0464.1	dars-1	-3.34775	0.00366819	10.3295
T24H7.3	T24H7.3	-3.34846	0.00996489	8.46444
C52E4.3	snr-4	-3.34853	0.00229885	9.16145
B0464.7	baf-1	-3.3498	0.00278433	10.8873
F11A10.5	F11A10.5	-3.35034	0.00402401	9.04363
W09B6.4	W09B6.4	-3.35117	0.00239538	8.78427
C18A3.1	C18A3.1	-3.35124	0.00353348	8.50238
Y48B6A.3	xrn-2	-3.3513	0.00213719	8.78656
Y71F9B.10	sop-3	-3.35281	0.00408209	9.22506
F18E2.2	abcf-1	-3.35428	0.0049421	10.0485
C10C6.6	C10C6.6	-3.35441	0.00191228	9.57659
C14B9.8	C14B9.8	-3.35443	0.0392601	8.80621
T05G5.9	T05G5.9	-3.35998	0.00192054	8.84707
F49C12.11	F49C12.11	-3.36009	0.00400436	10.1504
Y59A8A.3	Y59A8A.3	-3.36079	0.00527795	8.87062
C41D11.8	cps-6	-3.36235	0.00251222	9.10713
ZK652.1	snr-5	-3.36274	0.00200746	9.56203
H20J04.5	pfd-2	-3.36442	0.00227296	8.86818
T12D8.2	drr-2	-3.36466	0.00310217	9.58132
ZC477.3	ZC477.3	-3.3649	0.0100746	8.58692
R06C7.7	lin-61	-3.36778	0.00996864	9.03623
Y66D12A.10	Y66D12A.10	-3.37198	0.00217033	9.36858
Y48C3A.16	Y48C3A.16	-3.37615	0.00178964	9.04767
C35A5.8	C35A5.8	-3.37661	0.00278433	9.44206
C26E6.6	C26E6.6	-3.3767	0.0073463	8.73513
C56A3.5	C56A3.5	-3.37692	0.00513668	8.72973
ZK177.6	fzy-1	-3.37866	0.0118877	8.70217
Y46H3A.7	Y46H3A.7	-3.37978	0.00633146	9.95455
T10C6.8	T10C6.8	-3.38043	0.0301825	8.63529
C47E12.5	uba-1	-3.3806	0.00230028	10.2722
T06E4.3	atl-1	-3.3823	0.00266073	8.96223
ZK945.3	puf-12	-3.38301	0.00617195	9.40237
W09C5.7	W09C5.7	-3.38371	0.00272633	10.1286
ZK973.9	ZK973.9	-3.38577	0.0116849	9.10266
F59E10.3	F59E10.3	-3.38611	0.00253925	10.0626
F56C9.10	F56C9.10	-3.38679	0.00317958	9.171
F52A8.1	F52A8.1	-3.38689	0.00175621	9.58018
Y37D8A.10	Y37D8A.10	-3.3881	0.00170344	10.5231
C30B5.1	tag-319	-3.38861	0.00644413	8.70521
Y113G7A.8	fre-1	-3.39007	0.0161785	8.55006
VF39H2L.1	syx-17	-3.39021	0.00505718	9.15223
ZK1248.11	ZK1248.11	-3.39203	0.0235636	8.73069
F59G1.7	frh-1	-3.39274	0.00259993	9.21838
Y104H12D.1	mdt-20	-3.39282	0.0152041	8.9809
F57B10.11	bag-1	-3.39313	0.00163771	10.6856
F57B9.10	rpn-6.1	-3.39386	0.0115212	8.73412
F18C5.3	tag-184	-3.39407	0.0494871	8.11566
R144.3	R144.3	-3.39469	0.00267513	8.67788
D2005.7	D2005.7	-3.39485	0.0228882	8.82236
C41H7.3	C41H7.3	-3.39513	0.00457519	8.68535
ZC262.2	ZC262.2	-3.3975	0.00967081	8.77677
F58A4.8	tbg-1	-3.39943	0.00338948	9.41942
T24H7.4	T24H7.4	-3.40008	0.00622562	8.67475
C43E11.8	exoc-7	-3.40066	0.00328524	9.43757
T25G3.1	T25G3.1	-3.40126	0.00495293	8.42804
K08E4.6	K08E4.6	-3.40257	0.0183019	8.41891
C36B1.4	pas-4	-3.40354	0.00191228	10.8292
F11H8.1	rfl-1	-3.40358	0.00203594	9.60418
K04C2.2	K04C2.2	-3.40408	0.00755587	8.37609
T10G3.6	gut-2	-3.40601	0.00447462	8.64272
C35D10.10	C35D10.10	-3.40667	0.00291597	8.94188
R12E2.3	rpn-8	-3.4074	0.00411384	9.72599
Y2H9A.1	mes-4	-3.40949	0.00395613	8.83865
F44E2.7	F44E2.7	-3.40956	0.0351977	8.93233
C02F5.13	C02F5.13	-3.41144	0.00353348	9.10374
F33D11.11	vpr-1	-3.41173	0.00917708	9.45076
F29F11.3	tut-2	-3.41205	0.00256807	9.10055
R12E2.12	R12E2.12	-3.41243	0.00178964	9.14151
B0001.3	B0001.3	-3.41247	0.00415327	8.91125
R107.7	gst-1	-3.41266	0.00222904	11.4183
F53F4.3	F53F4.3	-3.41343	0.00252002	9.29071
Y54E10BR.8	ztf-23	-3.41417	0.014677	8.72422
ZC434.5	ears-1	-3.41498	0.00874246	10.4095
T14G10.6	tsp-12	-3.41782	0.0102301	9.12554
F28C6.6	suf-1	-3.41811	0.0150784	8.56558
H27A22.1	H27A22.1	-3.41812	0.00563342	8.77822
R06F6.12	R06F6.12	-3.41819	0.00208861	8.88323
F59E12.1	F59E12.1	-3.41846	0.00856469	8.51411
C54G6.5	spp-17	-3.41853	0.00237926	10.2324
R186.3	R186.3	-3.4191	0.00190408	9.55749
C17E4.10	C17E4.10	-3.41968	0.00890127	9.42456
C14A4.10	taf-13	-3.42024	0.00175489	9.0225
R01H10.1	div-1	-3.42058	0.00996106	8.90294
F29B9.4	psr-1	-3.42103	0.00190867	9.66084
T16H12.4	T16H12.4	-3.42107	0.00292501	8.71456
Y38A8.2	pbs-3	-3.42116	0.00274784	9.95641
D2023.6	D2023.6	-3.42327	0.0046241	8.91224
C13F10.6	C13F10.6	-3.4247	0.00415547	8.71687
Y110A7A.17	mat-1	-3.42538	0.00310458	10.1703
Y55F3AM.4	atg-3	-3.42861	0.0120472	9.80083
C56A3.8	C56A3.8	-3.42877	0.0161871	8.35101
F32D1.5	F32D1.5	-3.43265	0.00198207	11.8458
W06E11.4	sbds-1	-3.43347	0.00689908	9.14145
F39H11.5	pbs-7	-3.43364	0.00167581	11.4061
Y105E8A.11	Y105E8A.11	-3.43606	0.00182985	9.28023
C32F10.8	C32F10.8	-3.43807	0.00274784	10.3387
Y54E2A.11	eif-3.B	-3.44191	0.00501034	9.92352
F23C8.4	ubxn-1	-3.44649	0.00462483	8.80709
W02B12.10	W02B12.10	-3.4474	0.0148904	8.77866
C41C4.8	cdc-48.2	-3.44742	0.00179951	11.6097
C50E3.5	C50E3.5	-3.44801	0.0110649	8.46196
C02F5.1	knl-1	-3.44851	0.00686668	8.17836
Y65B4BL.5	acs-13	-3.44941	0.00215836	9.03325
C37A2.8	C37A2.8	-3.45002	0.00187026	9.70361
F39H2.3	F39H2.3	-3.4507	0.00329388	8.95873
T07C12.14	T07C12.14	-3.45126	0.00291885	8.75255
F43G9.10	mfap-1	-3.45184	0.00157908	9.56059
Y39A3CL.3	Y39A3CL.3	-3.4526	0.00687718	11.3373
Y50D4A.2	Y50D4A.2	-3.4536	0.00760527	9.7655
R186.8	R186.8	-3.45455	0.0020803	8.82657
B0393.3	B0393.3	-3.45457	0.00175621	8.81124
F33D11.9	F33D11.9	-3.45487	0.00461498	8.64878
F57B10.6	xpg-1	-3.4568	0.0161677	9.2735
Y55D9A.1	efa-6	-3.45774	0.00378091	9.11077
C25A1.4	C25A1.4	-3.45995	0.00167581	9.06652
F19F10.12	F19F10.12	-3.46127	0.00288394	9.60567
F40G12.11	F40G12.11	-3.46231	0.0109967	8.24861
M01E11.1	M01E11.1	-3.46298	0.00462786	8.84572
F46F11.6	F46F11.6	-3.46396	0.00529018	8.86319
Y40B10A.8	nhr-86	-3.46668	0.00232726	8.85967
ZK652.10	tag-307	-3.46772	0.00190408	9.11392
B0361.3	B0361.3	-3.46812	0.00413439	9.84643
T06D8.9	T06D8.9	-3.47144	0.00290785	10.3608
K12H4.8	dcr-1	-3.47171	0.00288463	8.73469
ZK632.6	cnx-1	-3.47243	0.0023001	10.7151
B0205.3	rpn-10	-3.47252	0.00239538	9.25261
T24H10.3	dnj-23	-3.47391	0.0047966	9.5189
F59B2.2	F59B2.2	-3.47446	0.0247856	8.71098
ZK973.3	pdp-1	-3.47455	0.00374495	10.2988
F13G3.10	F13G3.10	-3.47481	0.00267513	10.3723
T05H4.14	gad-1	-3.47537	0.00235912	8.89354
C26B2.1	dnc-4	-3.47563	0.00397159	8.63344
C09E7.7	C09E7.7	-3.47762	0.00391965	8.79493
DY3.1	tin-13	-3.47781	0.0015835	9.23849
C27H6.9	C27H6.9	-3.47828	0.00530659	8.24368
C27F2.9	C27F2.9	-3.47862	0.00539771	8.93347
F43G9.5	cfim-1	-3.47911	0.0101676	9.46654
T28A8.4	T28A8.4	-3.48038	0.0059913	9.03982
R119.3	R119.3	-3.48061	0.00181277	8.94392
ZK1058.5	ZK1058.5	-3.48087	0.016528	8.91884
C38D4.3	mel-28	-3.48193	0.0231805	9.7109
C06G3.9	C06G3.9	-3.48394	0.00878886	9.24711
F49E8.7	F49E8.7	-3.48395	0.00818426	8.7049
C50B8.1	C50B8.1	-3.48515	0.00332759	9.13122
Y57G11C.13	arl-8	-3.48583	0.00248055	10.2725
T21B10.7	cct-2	-3.48608	0.00164686	10.7797
F17C11.7	F17C11.7	-3.48654	0.00239976	9.26912
F41G3.6	F41G3.6	-3.4879	0.0112625	9.20685
Y52B11A.8	Y52B11A.8	-3.48791	0.00204586	10.4089
F07A11.2	F07A11.2	-3.48825	0.0488051	8.96141
C33H5.15	sgo-1	-3.48865	0.0104021	8.77048
B0212.3	B0212.3	-3.4888	0.00707621	8.87437
T19B10.4	pqn-70	-3.48883	0.00250788	9.65868
Y22D7AL.10	Y22D7AL.10	-3.48912	0.00148499	10.7742
F32H2.4	thoc-3	-3.48951	0.00494107	9.08015
Y37A1C.1	nkcc-1	-3.49008	0.00319568	8.89881
F29G9.5	rpt-2	-3.49117	0.00204547	9.77122
F58G11.5	tag-65	-3.49224	0.00203594	9.33905
F39H11.1	F39H11.1	-3.49225	0.00175489	9.65435
F20C5.1	pme-3	-3.49268	0.00503692	9.00036
T20G5.14	T20G5.14	-3.49444	0.00363484	9.93935
Y44E3B.1	zip-4	-3.49465	0.00178964	9.18672
T28B11.1	T28B11.1	-3.49658	0.00428548	9.07964
H06H21.6	ubxn-6	-3.49816	0.00319404	10.892
B0024.10	B0024.10	-3.49891	0.00473932	8.89515
ZK177.4	ZK177.4	-3.49957	0.00360159	9.06743
F58B3.6	F58B3.6	-3.50072	0.0358497	9.24115
T04A8.11	T04A8.11	-3.50162	0.00161449	9.28233
Y39B6A.36	Y39B6A.36	-3.50189	0.00902479	9.61785
C16A3.4	C16A3.4	-3.50265	0.00193444	9.60399
T11G6.8	T11G6.8	-3.50295	0.00370776	9.01407
C30B5.4	C30B5.4	-3.50386	0.00285719	9.75551
F54D7.6	F54D7.6	-3.50445	0.00315631	10.512
T01C3.2	T01C3.2	-3.50482	0.00340409	9.22476
Y32F6A.5	Y32F6A.5	-3.50521	0.00148499	11.3462
C10C5.6	daf-15	-3.50592	0.00176726	9.26869
C04G2.6	dis-3	-3.5062	0.00252002	8.90629
Y48G8AL.14	aps-3	-3.50706	0.00448002	8.51275
C12D8.10	akt-1	-3.50737	0.00374435	9.848
C36C9.1	C36C9.1	-3.50762	0.027561	8.69572
F46C5.9	F46C5.9	-3.50811	0.0107885	9.79942
C32D5.11	C32D5.11	-3.50831	0.0435269	8.31945
C09G9.2	C09G9.2	-3.50906	0.00167581	9.54791
F44B9.5	F44B9.5	-3.51216	0.00178964	9.2045
C17E4.5	pabp-2	-3.51601	0.00240393	10.1496
Y66D12A.9	Y66D12A.9	-3.5164	0.00628695	8.6035
T20F5.2	pbs-4	-3.5165	0.00194373	10.5106
R13A5.1	cup-5	-3.51686	0.0115212	9.06425
F25H8.2	F25H8.2	-3.51718	0.00148787	10.4203
T06D8.6	cchl-1	-3.51812	0.00291549	10.1638
ZK1098.5	ZK1098.5	-3.51824	0.00465823	9.32314
T05C12.7	cct-1	-3.51941	0.00337792	11.0143
F55C5.5	tsfm-1	-3.52176	0.0043658	9.33974
F44B9.8	F44B9.8	-3.52243	0.00586888	8.74534
C13F10.5	C13F10.5	-3.52322	0.00148551	9.21988
F55B11.2	F55B11.2	-3.52324	0.0423683	9.47572
F28F8.3	lsm-5	-3.52408	0.00175489	9.24247
Y41D4A.6	Y41D4A.6	-3.52408	0.00411384	9.25129
F14H3.4	F14H3.4	-3.5242	0.017484	7.98007
F42H10.7	ess-2	-3.5243	0.00216796	9.55787
B0240.4	npp-22	-3.52468	0.0067631	8.59283
T10C6.6	T10C6.6	-3.5252	0.0061583	9.6075
Y54E2A.3	tac-1	-3.52527	0.00247978	10.2969
K04G7.1	K04G7.1	-3.52628	0.00614999	8.73174
Y75B8A.16	Y75B8A.16	-3.52715	0.00611675	8.661
B0547.1	csn-5	-3.52806	0.00248018	9.15496
Y94H6A.3	Y94H6A.3	-3.52896	0.00363911	8.63848
F26G5.1	F26G5.1	-3.52923	0.00302744	8.7286
R11D1.9	R11D1.9	-3.5296	0.0131477	8.63019
F32H2.10	F32H2.10	-3.52976	0.00151984	8.41417
C47E12.1	sars-1	-3.52994	0.00191228	10.1795
F23C8.9	F23C8.9	-3.52995	0.0106259	8.95478
F49E8.2	F49E8.2	-3.53002	0.00363484	8.81826
F35H10.7	F35H10.7	-3.53039	0.00315631	8.71884
C44E4.3	C44E4.3	-3.53082	0.00390976	8.744
F41E6.13	atg-18	-3.53104	0.00274784	10.2124
C50F2.3	C50F2.3	-3.53126	0.00675628	9.17649
K07B1.7	K07B1.7	-3.53169	0.0120823	8.60235
F57C2.4	F57C2.4	-3.53176	0.00916281	9.17437
Y49E10.4	Y49E10.4	-3.53396	0.00777557	8.73884
H28O16.1	H28O16.1	-3.53453	0.00354113	11.5631
ZK757.4	ZK757.4	-3.5348	0.00592137	9.12397
F11G11.2	gst-7	-3.53822	0.00994545	11.4032
Y57G11C.12	nuo-3	-3.53829	0.00191228	9.9357
T07C4.5	ttr-15	-3.53895	0.00226858	11.389
C03E10.4	gly-20	-3.53936	0.00364477	9.32397
C01G6.8	cam-1	-3.53943	0.002834	9.22338
F09E8.3	msh-5	-3.54185	0.0155016	8.29072
C37H5.5	C37H5.5	-3.54356	0.00236737	9.291
F52B5.5	cep-1	-3.54401	0.00356682	8.57533
E01A2.4	E01A2.4	-3.54423	0.00534098	9.94177
F43G6.1	dna-2	-3.54508	0.00331911	8.99582
C27F2.10	C27F2.10	-3.54598	0.0206202	9.06465
Y87G2A.10	vps-28	-3.54609	0.00206014	9.24325
C01G8.9	let-526	-3.54615	0.00538647	8.45824
R12B2.4	him-10	-3.5462	0.0224548	9.06331
F44E7.4	F44E7.4	-3.54642	0.00648341	8.59573
C52E4.6	cyl-1	-3.54846	0.00869146	9.75041
C26F1.3	C26F1.3	-3.54992	0.00341319	9.15877
B0334.4	B0334.4	-3.55067	0.00173618	8.85018
M7.2	klc-1	-3.55081	0.00654205	9.11957
K08E7.1	eak-7	-3.55175	0.00354113	9.06004
F02H6.2	F02H6.2	-3.55389	0.0293702	7.79831
W03C9.2	W03C9.2	-3.55391	0.0119498	8.80438
T09B4.2	T09B4.2	-3.5546	0.0173395	9.15075
F01F1.5	dpf-4	-3.55563	0.00151984	9.39332
K04G2.6	K04G2.6	-3.5574	0.00413439	8.78305
F52B5.6	rpl-25.2	-3.55768	0.00194373	13.1641
F25H2.5	F25H2.5	-3.55929	0.00146786	13.0046
C29E4.3	ran-2	-3.55983	0.00212512	9.18031
Y43F4B.4	npp-18	-3.56096	0.0110796	8.96863
C38D4.4	C38D4.4	-3.56158	0.00774801	9.02988
K02F2.2	ahcy-1	-3.56278	0.00161449	8.81283
B0035.4	pfd-4	-3.56376	0.00592137	9.42191
Y49F6C.8	Y49F6C.8	-3.56398	0.00632398	8.59453
K07H8.2	K07H8.2	-3.56443	0.00190408	9.57287
T07D4.4	ddx-19	-3.56576	0.00773183	8.35863
F53F4.16	F53F4.16	-3.56717	0.00341013	8.64024
C02F5.6	C02F5.6	-3.56786	0.00330314	8.60835
D1014.3	snap-1	-3.56839	0.00554037	8.81769
T04A8.15	him-18	-3.56873	0.00455359	8.64272
Y53H1A.2	Y53H1A.2	-3.56877	0.00274784	8.7057
ZK1236.7	ZK1236.7	-3.56918	0.00142103	9.1751
Y41D4B.19	npp-8	-3.56984	0.00203771	9.30982
H20J04.8	sap-1	-3.57206	0.00596448	8.90924
F08F3.6	F08F3.6	-3.57221	0.0182548	9.20345
D2030.3	D2030.3	-3.57358	0.00274027	8.77172
F56B3.12	skr-18	-3.57469	0.00240393	9.86093
F23B12.6	fntb-1	-3.57501	0.00235191	9.52891
Y67H2A.6	csn-6	-3.57521	0.00351673	9.01316
C26E6.9	set-2	-3.57659	0.0262814	8.42739
C14A4.1	tag-242	-3.57745	0.00283828	9.33542
F33D4.7	F33D4.7	-3.57774	0.00758678	9.00549
T07A9.13	tag-261	-3.57952	0.00239538	8.42847
ZK863.3	elpc-3	-3.58016	0.00176034	8.82347
Y37A1B.1	lst-3	-3.58207	0.0026331	10.3382
Y47G6A.25	Y47G6A.25	-3.58252	0.0141852	8.85795
C33A12.1	C33A12.1	-3.58325	0.00943143	10.8902
Y47H9C.8	Y47H9C.8	-3.58367	0.0126641	8.93403
F56H1.4	rpt-5	-3.58383	0.00191228	9.46144
F49E11.1	mbk-2	-3.58457	0.00220059	9.75583
Y52D3.1	strd-1	-3.58514	0.00218185	8.97571
B0336.9	swp-1	-3.58545	0.00603423	8.93463
C47D12.2	C47D12.2	-3.58582	0.00328524	8.80012
C14C11.6	mut-14	-3.58672	0.00900976	8.58533
F25D7.1	cup-2	-3.58694	0.00215601	10.2083
D2005.3	D2005.3	-3.58745	0.00191639	8.90034
F42A8.3	F42A8.3	-3.58764	0.00212302	10.016
F37E3.1	ncbp-1	-3.58924	0.00607004	9.20014
F32E10.6	F32E10.6	-3.58953	0.00187026	9.20528
K02B12.3	sec-12	-3.58985	0.00448349	9.16706
F12F6.3	rib-1	-3.59014	0.00212463	9.70957
ZK652.9	coq-5	-3.59099	0.0025875	9.37989
C32E8.8	ptr-2	-3.59177	0.00387884	11.015
[truncated: 847 more rows]
