# Supplementary material for: A Functional Genomic Screen for Evolutionarily Conserved Genes Required for Lifespan and Immunity in Germline-Deficient C. elegans
Source: PLoS One. 2014 Aug 5;9(8):e101970. doi: 10.1371/journal.pone.0101970 (PMC4122342; doi:10.1371/journal.pone.0101970)
Supplement: Table S5 — Genes differentially regulated in long-lived C. elegans in a gonad-dependent manner. Comparison of Z(2,3)-ablated animals against gonad Z(1,4)-ablated animals. Components of the proteasomal complex are marked by the value "yes" and highlighted in green rows. (XLSX) [file pone.0101970.s008.xlsx]

## Sheet: Table S5
Table S5: Genes differentially regulated in long-lived C. elegans in a gonad-dependent manner Comparison of germline Z23 ablated animals against gonad Z14 ablated animals. Components of the proteasomal complex are marked by value "yes" and highlighted in green rows
ID	celPublic	logFC	P.Value	AveExpr	Proteasome component
F13D12.6	F13D12.6	8.86615	1.5611e-07	11.7854	no
H13N06.6	tbh-1	8.56444	3.96918e-06	11.1299	no
Y57G11B.5	Y57G11B.5	7.77236	2.94222e-05	10.3681	no
C44B7.5	C44B7.5	7.61856	6.62875e-06	10.9632	no
Y62H9A.5	Y62H9A.5	7.19042	2.05584e-06	11.9812	no
T24B8.5	T24B8.5	7.16102	1.10011e-05	10.0231	no
C10G8.4	C10G8.4	6.93036	2.58166e-05	11.9224	no
C39D10.7	C39D10.7	6.83162	1.90426e-05	11.5064	no
D1054.10	D1054.10	6.80592	1.34225e-05	11.7927	no
Y22D7AR.10	Y22D7AR.10	6.66281	2.33247e-05	10.4186	no
W03F11.1	W03F11.1	6.62967	4.53614e-06	12.0349	no
ZC373.2	ZC373.2	6.52108	0.000326998	12.1488	no
ZK813.1	ZK813.1	6.46235	1.608e-05	11.8059	no
D1054.11	D1054.11	6.39836	3.65549e-06	12.4381	no
T04G9.7	T04G9.7	6.39247	1.07807e-05	10.068	no
H34I24.2	H34I24.2	6.37227	0.000142905	11.1933	no
F13G11.3	F13G11.3	6.32681	1.51092e-05	10.5117	no
C01B10.6	C01B10.6	6.01454	1.81588e-05	10.3699	no
C02A12.4	lys-7	6.00566	0.00163029	9.78636	no
C08F11.11	C08F11.11	5.93926	0.000111859	11.4784	no
B0513.4	B0513.4	5.935	9.83687e-05	10.2992	no
ZK813.2	ZK813.2	5.81393	3.19071e-05	10.2216	no
ZK813.3	ZK813.3	5.80539	1.39847e-05	11.3425	no
Y62H9A.4	Y62H9A.4	5.78141	8.55685e-05	10.0216	no
Y32F6A.5	Y32F6A.5	5.69198	3.27964e-06	11.3462	no
Y45F10C.2	Y45F10C.2	5.65694	1.69146e-05	10.8103	no
F20H11.5	ddo-3	5.4245	9.06394e-06	10.3056	no
B0495.6	B0495.6	5.40633	0.00695756	9.85096	no
ZC434.8	ZC434.8	5.3562	1.91668e-05	10.7344	no
Y37D8A.19	Y37D8A.19	5.30134	0.00150772	12.4318	no
C08F11.12	C08F11.12	5.26237	7.58974e-05	10.3827	no
ZK813.7	ZK813.7	5.2302	3.26178e-05	9.99692	no
C54G6.5	spp-17	5.20374	3.14011e-05	10.2324	no
C14C6.5	C14C6.5	5.16047	3.98818e-05	8.98823	no
Y62H9A.6	Y62H9A.6	5.15033	4.90227e-05	11.9775	no
F56D6.8	F56D6.8	5.11701	9.12268e-05	9.11087	no
F49E12.1	F49E12.1	5.10942	0.000142664	10.736	no
C52E4.1	cpr-1	5.08701	0.000576974	12.2565	no
T22D1.5	T22D1.5	5.05825	0.000173904	10.0189	no
C17H12.8	C17H12.8	5.04616	0.00513372	11.3304	no
B0365.6	clec-41	5.02745	8.38011e-05	8.8718	no
F55B11.2	F55B11.2	5.01199	0.00406485	9.47572	no
F56D6.10	dct-8	4.994	3.32506e-05	8.65624	no
C07G2.1	cpg-1	4.92742	0.00031008	11.8313	no
K11D12.13	K11D12.13	4.84501	0.000480851	9.71916	no
F27C8.6	F27C8.6	4.74445	0.000208132	11.2413	no
F53H4.2	F53H4.2	4.68516	0.000531472	9.77606	no
C39E9.13	rfc-3	4.68113	0.000130842	10.0208	no
H39E23.3	H39E23.3	4.6613	1.22778e-05	8.30635	no
Y45F10C.4	Y45F10C.4	4.64869	0.000410307	9.89376	no
F55G1.4	rod-1	4.63473	0.000138266	9.63489	no
ZC404.8	spn-4	4.57781	0.000190963	11.4547	no
JC8.6	lin-54	4.56575	0.00125088	8.5955	no
Y62H9A.3	Y62H9A.3	4.54774	0.00803824	10.7409	no
C44B12.5	C44B12.5	4.54445	0.000183402	10.9063	no
T22F3.4	rpl-11.1	4.54001	2.5648e-05	13.1426	no
F44E2.2	retr-1	4.53843	6.36567e-05	10.2982	no
R06C7.4	cpg-3	4.50294	0.000363242	10.4894	no
F48E3.4	F48E3.4	4.50157	0.000143701	10.6909	no
C17G1.2	C17G1.2	4.49108	0.000726291	9.31056	no
W02D9.7	W02D9.7	4.46709	9.89351e-05	9.72781	no
EEED8.3	EEED8.3	4.43265	8.68266e-05	10.3012	no
M28.5	M28.5	4.40733	0.000111229	10.4244	no
T15B7.4	col-142	4.40032	0.00175431	9.08466	no
B0280.5	cpg-2	4.37175	0.000312464	12.3432	no
C25A1.8	clec-87	4.36607	3.92293e-05	12.0148	no
F41C3.5	F41C3.5	4.36407	3.0963e-05	11.8535	no
Y43E12A.1	cyb-2.1	4.35208	0.000736755	9.6575	no
K08H10.1	lea-1	4.3405	5.60958e-05	12.1299	no
T23G11.2	gna-2	4.29583	0.000319407	10.0663	no
C30A5.3	C30A5.3	4.29404	0.000955975	8.80219	no
K07A1.2	dut-1	4.29152	9.45798e-05	11.2171	no
K10H10.2	K10H10.2	4.28916	0.000135805	9.08321	no
C03C10.3	rnr-2	4.2819	0.000225582	10.7143	no
F54C9.8	puf-5	4.26184	0.000112939	11.3221	no
F57C2.4	F57C2.4	4.25957	0.00140742	9.17437	no
T05E11.9	T05E11.9	4.23227	0.00254201	8.2811	no
R05H5.3	R05H5.3	4.23044	6.90686e-05	10.7786	no
F26D10.10	gln-5	4.20604	0.000427664	10.6158	no
ZK1127.1	nos-2	4.20268	0.0044717	9.81805	no
K03H1.4	ttr-2	4.20011	0.000103717	10.4224	no
R08C7.3	htz-1	4.19338	7.98133e-05	11.543	no
Y73B6BL.9	hil-2	4.17166	0.000273761	10.5808	no
R10E4.4	mcm-5	4.16731	5.80439e-05	10.3956	no
F41G4.2	cas-1	4.15553	0.000524426	8.63222	no
F45E4.2	plp-1	4.15155	0.00117618	10.5856	no
K02D7.3	col-101	4.13125	2.58997e-05	11.1483	no
M01E11.6	klp-15	4.12795	3.93159e-05	10.8209	no
ZC168.3	ZC168.3	4.11943	0.000936969	9.5788	no
ZC168.4	cyb-1	4.08879	0.000105994	11.0346	no
K10B2.3	clec-88	4.0816	0.000279433	10.2993	no
ZK1055.1	hcp-1	4.0675	0.00232084	8.93232	no
F43D9.4	sip-1	4.0553	0.000115105	12.9628	no
C14B9.4	plk-1	4.0514	0.000720258	9.76761	no
B0238.11	B0238.11	4.04884	0.000245021	9.1597	no
T07D4.4	ddx-19	4.03707	0.00159734	8.35863	no
T19H12.2	T19H12.2	4.03053	0.000878472	10.2916	no
R07E5.3	snfc-5	4.02283	0.00183408	9.95411	no
F56A8.5	F56A8.5	4.01662	0.000399848	8.76876	no
C25A8.4	C25A8.4	4.01007	0.00239179	11.8224	no
M199.4	clec-190	4.00848	6.2057e-05	8.12325	no
C01G6.3	C01G6.3	4.00145	0.00327617	10.0738	no
C37C3.9	C37C3.9	3.999	0.00112136	9.38718	no
M01E11.5	cey-3	3.98676	0.000871692	10.5918	no
Y39A1A.14	Y39A1A.14	3.96988	0.00129473	9.18916	no
ZK792.2	inx-8	3.95683	0.00433854	10.5204	no
B0414.3	hil-5	3.95435	0.000423471	11.0216	no
C47D12.5	C47D12.5	3.95345	0.00154749	7.98392	no
ZK816.5	dhs-26	3.95336	0.00150993	9.41752	no
F54D5.5	F54D5.5	3.94174	0.00873885	8.03305	no
T21G5.3	glh-1	3.93438	0.000974664	11.3801	no
C44B12.1	C44B12.1	3.92717	3.32831e-05	9.08901	no
F55G1.8	plk-3	3.92227	0.00049071	9.97483	no
T19B10.6	T19B10.6	3.91237	0.000608226	9.75309	no
C04H5.2	clec-147	3.91077	0.033869	7.95438	no
K06A4.1	nas-3	3.90373	0.000486623	7.9097	no
F57B10.12	mei-2	3.90276	0.000195403	10.332	no
C01G8.9	let-526	3.89462	0.00113397	8.45824	no
R08D7.3	eif-3.D	3.88056	0.000408699	10.1677	no
C14H10.1	C14H10.1	3.868	6.80611e-05	8.62605	no
C42C1.2	C42C1.2	3.85055	0.00414816	8.80129	no
Y71H2B.6	mdt-19	3.84779	0.00174227	8.97555	no
C48E7.2	C48E7.2	3.84586	0.000170757	9.32103	no
K02B9.1	meg-1	3.84295	0.000343131	9.80989	no
C01G5.2	prg-2	3.83862	0.000929999	10.0134	no
D1025.9	nspc-19	3.81308	0.00744345	7.88856	no
F26A1.1	F26A1.1	3.81171	0.00143862	9.41586	no
R06C7.1	R06C7.1	3.80704	0.000907303	9.72612	no
Y45F10A.2	puf-3	3.80533	9.64341e-05	10.5326	no
F46F11.8	F46F11.8	3.80283	0.00100719	9.31274	no
T12B5.15	T12B5.15	3.80187	0.00150255	8.7344	no
F45D3.4	F45D3.4	3.79421	7.99312e-05	8.94862	no
F14D2.15	F14D2.15	3.76351	0.00494667	9.3367	no
T01D3.6	T01D3.6	3.76162	0.00016078	10.9359	no
F31E3.3	rfc-4	3.76119	0.00087195	10.0587	no
Y39A1A.12	Y39A1A.12	3.76117	0.000939051	9.3717	no
C14A4.1	tag-242	3.75901	0.000857354	9.21615	no
T07C4.5	ttr-15	3.75712	0.000275135	11.389	no
ZK637.13	glb-1	3.75077	9.8463e-05	9.27414	no
Y102A5C.18	efl-1	3.74948	0.00330298	8.4063	no
Y48A6B.3	Y48A6B.3	3.74836	6.83325e-05	11.4242	no
C43E11.9	C43E11.9	3.74648	0.000296118	9.44281	no
C52D10.9	skr-8	3.74469	0.00140076	8.42153	no
F18A1.7	F18A1.7	3.74195	0.00256089	9.78508	no
D1086.6	D1086.6	3.74122	0.000670304	8.28768	no
R07G3.3	npp-21	3.73781	9.3844e-05	10.8304	no
ZK384.2	scl-20	3.73147	0.000125466	8.33326	no
F52A8.1	F52A8.1	3.72867	8.61258e-05	9.58018	no
W03D2.1	pqn-75	3.72099	0.00263189	8.62736	no
Y73B6BL.38	puf-11	3.70796	0.00234412	10.7677	no
W09C3.7	W09C3.7	3.70354	0.000337028	8.06362	no
C39E9.2	scl-5	3.70266	7.99392e-05	8.30602	no
F54D5.7	F54D5.7	3.70248	4.1529e-05	8.59912	no
Y48E1C.2	Y48E1C.2	3.70003	7.96159e-05	8.83471	no
K07A1.1	K07A1.1	3.69395	0.000362018	9.46875	no
C23H3.2	C23H3.2	3.69192	0.000107918	8.21281	no
F18A1.3	lir-1	3.67873	0.000941976	9.68396	no
T07A9.6	daf-18	3.67644	0.000395393	11.2322	no
W05F2.6	W05F2.6	3.66954	0.00469885	9.69089	no
F31C3.5	F31C3.5	3.66911	0.00285446	8.90492	no
C48B4.7	C48B4.7	3.66864	0.00216182	8.92997	no
C48E7.11	C48E7.11	3.66576	0.00120387	9.21326	no
F23F12.6	rpt-3	3.6656	0.00453382	10.9496	YES
T23G7.1	dpl-1	3.66444	0.00381365	9.87862	no
T24D1.2	T24D1.2	3.66423	0.000558722	9.30913	no
F20H11.3	mdh-2	3.65966	0.00096487	8.68328	no
W02B9.1	hmr-1	3.65658	0.0269975	7.36988	no
C34F6.3	col-179	3.65334	7.03514e-05	12.6228	no
Y41C4A.16	col-95	3.65307	0.000520491	9.70393	no
ZK381.1	him-3	3.65204	0.00310898	9.31312	no
B0041.8	B0041.8	3.64622	0.00116231	9.56428	no
F43D2.6	F43D2.6	3.6462	0.0118998	8.12403	no
C42C1.8	C42C1.8	3.64279	0.00188119	8.84523	no
K08E3.3	toca-2	3.63235	0.00081631	9.86016	no
F55B11.3	F55B11.3	3.63167	0.0065769	9.3226	no
T14F9.3	hex-1	3.62708	0.000334473	9.04634	no
F27E5.1	F27E5.1	3.62353	0.000193003	9.18372	no
Y48E1B.16	clec-145	3.62226	0.0414117	7.61782	no
C32F10.5	hmg-3	3.62066	0.000849654	9.63518	no
T01G9.4	npp-2	3.61854	0.000854715	9.914	no
C01G10.8	C01G10.8	3.61678	0.00066443	10.7019	no
F54E2.3	ketn-1	3.61001	0.000158859	7.80938	no
C24G6.8	C24G6.8	3.60686	9.77703e-05	10.1325	no
C27D11.1	egl-45	3.60067	0.000621048	10.7148	no
C05C8.6	C05C8.6	3.59552	0.000603031	9.10672	no
F58G6.5	nhr-34	3.59376	0.0368328	8.63486	no
F25H5.4	eef-2	3.59291	0.00765241	11.3406	no
F40E3.2	F40E3.2	3.59222	0.000330113	9.34653	no
F39H2.5	mrt-1	3.58499	0.00200268	9.08865	no
Y71F9AL.14	dnc-5	3.58425	0.000423271	9.44935	no
F25B4.9	clec-1	3.58052	6.2435e-05	10.5536	no
F57C2.1	btb-20	3.57097	0.00637045	8.99287	no
W01A8.5	W01A8.5	3.56818	0.0150194	10.175	no
F54F7.2	F54F7.2	3.56759	0.000369493	8.58071	no
D1043.1	D1043.1	3.56391	0.00165632	8.92273	no
T05G5.3	cdk-1	3.563	0.000440459	10.405	no
C28C12.12	C28C12.12	3.56207	0.00734143	9.36592	no
ZC412.3	ZC412.3	3.56125	0.000389987	8.96404	no
F31C3.4	F31C3.4	3.55898	0.000289211	8.64028	no
F23H11.9	crls-1	3.55646	0.00116262	9.33061	no
ZK1010.3	frg-1	3.55461	0.00062647	10.2907	no
C14C6.2	C14C6.2	3.55342	0.00116402	7.72925	no
R173.1	cah-5	3.55309	0.00157475	8.8438	no
Y119C1B.4	Y119C1B.4	3.55306	0.00565898	8.72307	no
C09G5.5	col-80	3.54796	0.00119917	12.2888	no
F31C3.11	rrn-2.1	3.54401	0.000283998	9.71809	no
C43E11.7	ndx-7	3.54313	0.00216875	9.10947	no
ZK616.6	ZK616.6	3.54248	0.00015053	8.72447	no
T05G5.7	rmd-1	3.53996	0.0010656	10.737	no
F32H2.3	spd-2	3.53727	0.000228886	8.85196	no
R09B3.1	exo-3	3.53533	0.00155632	9.93115	no
C06A1.5	rpb-6	3.53276	0.00495774	9.73349	no
F26B1.3	ima-2	3.52784	0.00161957	10.2169	no
F14D2.12	bath-30	3.52546	0.00330264	9.0202	no
T07A9.5	eri-1	3.52252	0.00765588	8.81199	no
C09D4.2	C09D4.2	3.52231	0.00103191	9.33893	no
W08E3.1	snr-2	3.52009	0.000227902	10.5436	no
Y54H5A.4	oxy-4	3.51841	0.0141479	8.4452	no
Y47D7A.1	skr-7	3.51566	0.0251143	8.38485	no
W05B2.6	col-92	3.51349	0.00215483	8.32841	no
C38C6.2	atgp-2	3.51204	0.0131942	7.83768	no
T09F3.2	T09F3.2	3.50947	0.00194474	10.6254	no
C09H10.6	nasp-1	3.49818	0.000110032	10.8003	no
C14C11.6	mut-14	3.49558	0.00437998	8.58533	no
W03D2.4	pcn-1	3.4937	0.000274308	11.4552	no
F42G8.12	isp-1	3.49356	0.000302453	9.89265	no
C37H5.6	C37H5.6	3.49231	0.000106114	10.4533	no
F36H1.6	alh-3	3.48696	0.00604747	8.2588	no
F35G12.10	asb-1	3.48612	0.000451154	10.7763	no
F25B5.6	F25B5.6	3.48603	0.000470293	9.11971	no
C47E8.4	C47E8.4	3.48461	0.000988491	9.47301	no
F14D2.13	bath-28	3.48433	0.00100983	8.49766	no
Y58A7A.1	Y58A7A.1	3.48406	0.0268367	7.50411	no
F27C1.8	dpy-5	3.48272	0.00715124	9.51847	no
C54D10.3	C54D10.3	3.48252	0.000161348	8.2292	no
C32F10.8	C32F10.8	3.47968	0.000578309	10.3387	no
T01E8.4	mec-15	3.47909	0.000612631	9.3355	no
F49E8.2	F49E8.2	3.47788	0.00112062	8.81826	no
R03E9.1	mdl-1	3.47719	0.0107352	7.94546	no
C28C12.5	spp-8	3.47658	0.000377404	10.1096	no
W02D9.6	W02D9.6	3.47602	0.000986519	8.50477	no
M02B7.2	M02B7.2	3.47172	0.0176144	8.14665	no
T26A5.9	dlc-1	3.46848	0.000505377	8.96996	no
F48E8.1	lon-1	3.46266	0.00156807	9.31862	no
Y105E8B.8	ero-1	3.46227	0.0130752	8.68743	no
T10B5.6	knl-3	3.45995	0.00111164	9.40017	no
F44C4.5	ppt-1	3.45978	0.030108	7.9685	no
F41H10.6	hdac-6	3.45936	0.0031148	9.31294	no
F59A7.4	hil-6	3.45906	0.00520168	10.8247	no
C56A3.6	C56A3.6	3.458	0.000587049	9.05478	no
H31G24.4	cyb-2.2	3.45572	0.00228245	10.0961	no
C27H6.3	C27H6.3	3.45451	0.00186189	9.61083	no
Y39B6A.37	Y39B6A.37	3.45333	0.00700317	9.47708	no
F20A1.9	F20A1.9	3.45205	0.00484932	9.33822	no
F32H2.10	F32H2.10	3.45115	0.000109257	8.41417	no
T28F2.2	T28F2.2	3.4504	0.000131272	8.25298	no
T23H2.3	T23H2.3	3.44667	0.00112453	8.95868	no
C53B7.3	C53B7.3	3.4463	0.00146324	9.4102	no
F59A2.1	npp-9	3.43667	0.000596199	9.87415	no
C01B10.3	C01B10.3	3.43403	0.000210567	8.99076	no
F42G2.8	fbxa-4	3.42781	0.0486985	7.90757	no
T11F8.3	rme-2	3.42781	0.00025079	12.9299	no
Y53F4B.45	Y53F4B.45	3.42731	0.00273491	9.19725	no
F09F7.2	mlc-3	3.4259	0.00269209	9.21932	no
R17.2	R17.2	3.42309	0.000353702	9.14196	no
F15E6.8	dct-7	3.42223	0.00241537	9.0533	no
R09B3.2	R09B3.2	3.42132	0.00126177	10.9521	no
K08F11.4	yars-1	3.42004	0.000246309	8.89571	no
F02D10.1	col-183	3.41925	0.000787567	8.18691	no
F58F6.2	col-105	3.4186	0.000168185	10.7715	no
C01G8.1	C01G8.1	3.41771	0.00355197	9.58966	no
Y39H10A.3	mtm-9	3.41623	0.00199972	9.22442	no
ZK1193.2	ZK1193.2	3.41228	0.000132321	8.23346	no
T28D9.10	snr-3	3.40303	0.000815939	9.5127	no
B0416.5	B0416.5	3.40264	0.00191334	8.38567	no
B0432.10	B0432.10	3.40209	0.00245601	9.12118	no
C26E6.8	ula-1	3.40162	0.0177528	9.10145	no
ZC328.4	san-1	3.39984	0.00201674	9.53674	no
F49F1.7	F49F1.7	3.39897	0.00571476	8.27356	no
C08A9.10	C08A9.10	3.39735	0.001278	9.13318	no
F29C4.2	F29C4.2	3.39516	0.00107909	9.18015	no
Y39G10AR.14	mcm-4	3.39354	0.0010286	9.94558	no
F44E2.6	F44E2.6	3.39093	0.00168234	9.22254	no
R08E5.2	R08E5.2	3.39054	0.000130545	8.75214	no
Y39B6A.10	Y39B6A.10	3.38923	0.00280625	9.12046	no
K04G2.6	K04G2.6	3.38899	0.00168003	8.78305	no
F02H6.2	F02H6.2	3.38879	0.018144	7.79831	no
Y87G2A.7	Y87G2A.7	3.38847	0.00100032	9.01465	no
K11D12.5	K11D12.5	3.38329	0.00179345	8.88243	no
K08F4.3	K08F4.3	3.37418	0.00079971	9.26472	no
Y69H2.3	Y69H2.3	3.37101	0.000183186	8.47568	no
W03G11.3	W03G11.3	3.37021	0.00519782	8.03617	no
C53A5.17	C53A5.17	3.3671	0.000794539	8.09653	no
W05B10.1	his-74	3.36477	0.0124884	9.99516	no
F22D6.9	F22D6.9	3.3633	0.00989559	8.71654	no
C29H12.1	rars-2	3.36315	0.00724827	9.15461	no
F19B6.1	F19B6.1	3.36238	0.000280925	10.2923	no
F38E11.5	F38E11.5	3.35902	0.00257134	8.07612	no
F18E2.1	F18E2.1	3.3572	0.000102716	10.4064	no
F42A8.2	sdhb-1	3.35498	0.000364237	9.85466	no
Y53H1A.5	nfya-2	3.3548	0.0224384	8.0224	no
C36B1.11	C36B1.11	3.35422	0.0243305	8.78622	no
C01F1.2	sco-1	3.35358	0.00132133	8.55838	no
C28D4.3	gln-6	3.35327	0.000478716	11.899	no
K08E3.10	K08E3.10	3.35303	0.000666745	9.02176	no
T23F2.3	T23F2.3	3.35236	0.000246906	8.21919	no
K07A1.6	K07A1.6	3.34774	0.00146238	8.57624	no
F45G2.10	F45G2.10	3.3475	0.00588364	8.44128	no
K08F11.3	cif-1	3.34393	0.00048151	9.29929	no
C41G7.2	klp-16	3.33985	0.000314244	10.6335	no
W03A3.2	polq-1	3.3394	0.000392091	9.47397	no
D1054.14	D1054.14	3.33729	0.00913453	9.4238	no
C16A11.6	fbxc-44	3.33534	0.00182142	8.91477	no
Y95D11A.1	Y95D11A.1	3.33479	0.00233788	8.43575	no
ZK757.4	ZK757.4	3.33394	0.00303318	9.12397	no
F54F7.3	F54F7.3	3.33358	0.00726731	8.51326	no
C41G7.9	C41G7.9	3.3317	0.00395538	10.745	no
ZK1067.3	ZK1067.3	3.33159	0.00103695	10.0169	no
F56C9.6	F56C9.6	3.33002	0.00194381	9.23149	no
Y53C10A.6	Y53C10A.6	3.32872	0.000927737	9.35252	no
W02F12.3	W02F12.3	3.32367	0.000364151	11.0183	no
D1086.11	D1086.11	3.31888	0.00555608	8.59252	no
Y53H1A.2	Y53H1A.2	3.31825	0.000943166	8.7057	no
D1037.1	D1037.1	3.31761	0.000823731	8.69895	no
Y45F10A.4	seld-1	3.31725	0.018513	7.5819	no
C03D6.5	asfl-1	3.31423	0.00291835	8.45676	no
ZK1193.1	col-19	3.31332	0.000150868	10.65	no
H26D21.2	msh-2	3.31263	0.00653977	9.39151	no
T09A5.10	lin-5	3.311	0.00678005	9.18378	no
C34F6.2	col-178	3.31097	8.20478e-05	13.5724	no
F10C5.2	F10C5.2	3.31045	0.00873689	8.16773	no
T01C3.7	fib-1	3.30594	0.0047428	11.5247	no
M01E5.5	top-1	3.30578	0.00145271	9.06257	no
K02G10.4	flp-11	3.30537	0.00153954	7.70276	no
C43E11.2	mus-81	3.30465	0.000364495	8.8456	no
Y54G9A.6	bub-3	3.30119	0.000982522	9.29257	no
K08F9.2	aipl-1	3.29641	0.00292528	9.20569	no
F29F11.1	sqv-4	3.29484	0.00139509	11.0182	no
F35E12.7	dct-17	3.29409	0.00113192	8.35388	no
T01C3.3	T01C3.3	3.29107	0.00438942	11.4026	no
B0001.3	B0001.3	3.29012	0.00158648	8.91125	no
Y69A2AR.32	Y69A2AR.32	3.28919	0.00172892	8.77811	no
C25A1.9	rsa-1	3.28916	0.00146113	9.87721	no
M05D6.2	M05D6.2	3.28902	0.00186476	9.27453	no
F14H3.4	F14H3.4	3.28809	0.0117176	7.98007	no
C47B2.3	tba-2	3.28694	0.0025264	11.3069	no
F35G12.9	apc-11	3.28437	0.0022037	8.92859	no
T21C9.8	ttr-23	3.28076	0.0206916	7.83276	no
C49G7.3	C49G7.3	3.27828	0.00287696	8.51195	no
Y50D7A.10	Y50D7A.10	3.27743	0.00288061	8.60114	no
D2096.7	D2096.7	3.276	0.018387	8.18804	no
Y54E5A.4	npp-4	3.27478	0.000475293	8.9808	no
F46H6.1	rhi-1	3.26932	0.000142136	8.32683	no
Y54F10AM.11	Y54F10AM.11	3.26814	0.00458789	8.47093	no
F38E1.7	mom-2	3.26792	8.10257e-05	10.2967	no
ZK643.5	ZK643.5	3.26444	0.00264323	9.27819	no
Y39A1A.11	dhs-11	3.26017	0.00160821	9.51499	no
R03D7.6	gst-5	3.25877	0.000988494	9.35961	no
T23G5.1	rnr-1	3.25871	0.00517084	10.9828	no
C25A1.3	tag-72	3.25721	0.0223483	8.20628	no
F55A4.1	sec-22	3.25683	0.0110954	7.97271	no
F26E4.10	drsh-1	3.25079	0.00347746	9.04019	no
T28C6.8	T28C6.8	3.24697	0.0227177	8.31181	no
F44F4.11	tba-4	3.24496	0.000382567	8.75648	no
Y54G2A.36	Y54G2A.36	3.24442	0.000398698	11.7948	no
C14F11.5	hsp-43	3.24376	0.00267951	8.50255	no
C05C10.2	C05C10.2	3.24279	0.00167865	8.55953	no
F20D1.10	tag-299	3.24239	0.000254182	8.5056	no
Y48E1B.14	Y48E1B.14	3.24022	0.00238253	8.50029	no
VF13D12L.1	VF13D12L.1	3.23731	0.00407006	10.0282	no
F52F12.3	mom-4	3.23549	0.00247466	9.03712	no
R12E2.4	inx-17	3.23295	0.00593198	7.79639	no
W02A2.9	W02A2.9	3.23253	0.00121624	8.19671	no
F35G12.11	F35G12.11	3.2307	0.0237816	8.77911	no
Y10G11A.1	Y10G11A.1	3.22958	0.0314412	7.73925	no
C53B4.5	col-119	3.22867	0.028134	9.36663	no
C39E9.11	C39E9.11	3.22807	0.00951387	10.2357	no
Y42H9B.3	Y42H9B.3	3.22529	0.00142147	9.72923	no
C15F1.3	tra-2	3.22498	0.00889638	8.66285	no
K01C8.9	nst-1	3.22492	0.00660459	9.75789	no
F53F4.16	F53F4.16	3.22421	0.00165248	8.64024	no
F53H4.1	csb-1	3.22136	0.00123983	8.45783	no
Y51H7C.3	Y51H7C.3	3.2195	0.00269883	9.01786	no
C54G10.2	rfc-1	3.21812	0.000719046	10.1579	no
C43G2.1	paqr-1	3.21731	0.0441056	8.11906	no
K02B7.3	K02B7.3	3.21669	0.00432129	8.47384	no
B0001.1	lin-24	3.21502	0.00186733	8.68034	no
C26E6.5	fsn-1	3.21146	0.000416826	9.93739	no
R05G9.3	R05G9.3	3.21105	0.000171396	7.9635	no
Y105C5A.1	Y105C5A.1	3.20917	0.0139092	7.77471	no
C39D10.8	C39D10.8	3.20772	0.00608135	7.70082	no
ZC262.2	ZC262.2	3.20743	0.00563681	8.77677	no
K08D12.1	pbs-1	3.20265	0.00235075	10.1691	YES
Y75B12B.4	bath-36	3.2015	0.0144172	7.88966	no
F59A3.4	F59A3.4	3.20089	0.00251704	8.98999	no
F44B9.5	F44B9.5	3.19991	0.000336611	9.2045	no
Y71F9AM.5	nxt-1	3.19945	0.000404655	9.86663	no
Y17G7B.1	acbp-6	3.19787	0.000808311	8.01944	no
T24H7.3	T24H7.3	3.19622	0.0055554	8.46444	no
F26A3.3	ego-1	3.19388	0.0319019	10.0384	no
T04H1.5	T04H1.5	3.19234	0.00712475	9.19215	no
W07B8.5	cpr-5	3.19202	0.00111124	10.9219	no
F52C6.9	bath-6	3.19045	0.000640668	7.93615	no
F38A5.7	F38A5.7	3.18964	0.00842501	9.13573	no
Y43C5A.6	rad-51	3.1889	0.00475209	9.15824	no
F11C3.3	unc-54	3.18865	0.00370083	7.94608	no
F12F6.7	F12F6.7	3.18848	0.000948761	9.32554	no
F07A5.1	inx-14	3.18782	0.0032405	9.52032	no
M28.6	lact-3	3.18699	0.0127374	9.13861	no
T06E4.1	hcp-2	3.1868	0.00763365	9.26273	no
F37C12.7	acs-4	3.18671	0.00388085	9.07711	no
C56A3.8	C56A3.8	3.18483	0.0110744	8.35101	no
M02B1.3	M02B1.3	3.18336	0.00134356	8.63864	no
K08D10.2	dnj-15	3.18324	0.000638384	9.04644	no
Y92C3B.1	kbp-4	3.183	0.00319551	9.84035	no
C41D11.7	eri-7	3.18293	0.00451909	8.42187	no
C29H12.2	C29H12.2	3.17926	0.00207734	8.51338	no
Y37D8A.16	Y37D8A.16	3.17873	0.00135744	8.42541	no
T28C6.1	grsp-2	3.17742	0.0140762	8.16967	no
F13E6.4	F13E6.4	3.17654	0.00116177	8.49941	no
K04C2.2	K04C2.2	3.17631	0.00442813	8.37609	no
F57C2.2	btb-19	3.1755	0.00121219	9.09255	no
B0348.6	ife-3	3.17495	0.00331499	9.24111	no
C08B11.6	C08B11.6	3.17159	0.000933971	9.15023	no
C44B7.1	C44B7.1	3.17128	0.00386075	9.54562	no
F20G2.1	F20G2.1	3.17009	0.000214974	8.67765	no
C10G11.7	C10G11.7	3.16784	0.000860818	10.0364	no
C38C10.4	gpr-2	3.16594	0.00370879	9.16591	no
ZC376.3	ZC376.3	3.16491	0.00183707	8.53803	no
C33F10.14	C33F10.14	3.16454	0.000840284	9.45669	no
DY3.7	sup-17	3.16351	0.000325157	10.4956	no
ZK792.3	inx-9	3.1626	0.000154785	8.35348	no
F26A3.4	F26A3.4	3.16249	0.00237478	8.33832	no
ZK1058.1	mmcm-1	3.16143	0.000729227	8.99872	no
F20D12.4	czw-1	3.16103	0.0076236	9.71138	no
C56G7.1	mlc-4	3.15991	0.000735134	9.61415	no
K09F5.3	spp-14	3.15787	0.00107158	10.684	no
C26F1.3	C26F1.3	3.15585	0.00181589	9.15877	no
F11G11.12	col-73	3.15527	0.00145223	12.2385	no
C13F10.5	C13F10.5	3.15323	0.00106935	8.65836	no
B0035.10	his-45	3.15183	0.00469756	9.97102	no
K12H4.8	dcr-1	3.15136	0.00119786	8.73469	no
F27D4.8	F27D4.8	3.15048	0.0128398	8.0503	no
R10D12.9	R10D12.9	3.14906	0.000438557	8.62381	no
T08B1.4	T08B1.4	3.14798	0.00864152	8.26306	no
F55G1.6	F55G1.6	3.14751	0.0034877	9.25376	no
C34G6.7	stam-1	3.14563	0.000324768	8.85413	no
K07F5.9	ssp-10	3.14464	0.000430012	8.27014	no
F31C3.9	rrn-3.1	3.14447	0.00031244	14.2793	no
F19B10.1	F19B10.1	3.14032	0.0124164	8.07196	no
Y66D12A.21	Y66D12A.21	3.13808	0.00230143	8.83123	no
C30F12.4	C30F12.4	3.13744	0.000541114	8.17433	no
C03G5.2	nspc-7	3.13584	0.000325848	8.00915	no
C03H5.3	C03H5.3	3.13573	0.00528242	9.44244	no
F40G9.2	F40G9.2	3.1355	0.00420261	9.11374	no
ZK596.1	ZK596.1	3.13428	0.0161947	8.42146	no
C35B1.4	C35B1.4	3.1327	0.000455798	10.1981	no
ZK593.4	rbr-2	3.13259	0.00800615	9.07933	no
Y47G6A.12	sep-1	3.13111	0.000866904	9.64007	no
F11G11.3	gst-6	3.12971	0.00253572	8.38978	no
T23F11.1	T23F11.1	3.12924	0.000850488	8.14475	no
Y110A7A.10	aap-1	3.12874	0.00266799	8.82515	no
F49C12.9	F49C12.9	3.12854	0.000494538	9.6413	no
R10E11.4	sqv-3	3.12532	0.00462569	8.52418	no
H02I12.1	cbd-1	3.12485	0.000454506	10.5981	no
C05C10.5	C05C10.5	3.1248	0.00596548	9.91184	no
T28D9.2	rsp-5	3.12428	0.00113402	9.90564	no
F48E8.7	skpt-1	3.12293	0.00370189	9.61964	no
C36E6.3	mlc-1	3.12178	0.000139975	11.8014	no
C14B1.4	wdr-5	3.12026	0.00410309	8.86096	no
F49A5.12	F49A5.12	3.11856	0.0470643	9.56912	no
F59E10.3	F59E10.3	3.11839	0.000863168	10.0626	no
F28D1.5	thn-2	3.1183	0.000777676	12.0499	no
K11D2.2	asah-1	3.11715	0.00264652	9.78652	no
F23H12.2	tomm-20	3.11583	0.00115136	9.52796	no
C48E7.1	C48E7.1	3.11578	0.00428971	8.4624	no
F46H5.3	F46H5.3	3.11381	0.00017796	12.2205	no
M05D6.4	lact-4	3.11314	0.000275179	8.56748	no
K07G5.2	xpa-1	3.11312	0.00413263	9.10302	no
C24A11.9	coq-1	3.11305	0.00830411	8.65049	no
F58A4.2	F58A4.2	3.11194	0.000795965	8.96413	no
F53H8.1	apm-3	3.1117	0.000458513	8.22548	no
F59B2.2	F59B2.2	3.11158	0.0201411	8.71098	no
T07E3.3	T07E3.3	3.11025	0.00134026	7.80344	no
C02B10.2	C02B10.2	3.10993	0.00589943	8.19894	no
F25B4.6	F25B4.6	3.10922	0.00875396	8.31103	no
C25A1.12	C25A1.12	3.10626	0.000390181	9.23153	no
B0464.9	B0464.9	3.10407	0.0105892	8.9887	no
F54D5.9	F54D5.9	3.10385	0.000991791	10.1125	no
ZK858.3	clec-91	3.10219	0.00280162	10.4531	no
F56H1.4	rpt-5	3.10213	0.000556376	9.46144	YES
T26A5.3	nduf-2.2	3.10172	0.000443793	10.4443	no
C06A5.8	C06A5.8	3.09805	0.00459844	9.30684	no
C49G7.4	phat-3	3.09784	0.00132859	8.40603	no
D1054.15	tag-135	3.09779	0.000691628	9.70472	no
R07E4.3	R07E4.3	3.09727	0.00276532	8.86639	no
F28C6.3	cpf-1	3.09687	0.000858995	10.0355	no
Y62E10A.14	Y62E10A.14	3.09677	0.0179075	9.04454	no
T19B10.7	ima-1	3.09459	0.00112314	9.87033	no
C28H8.11	C28H8.11	3.09405	0.00104404	8.70082	no
ZK742.5	lbp-4	3.09045	0.00382805	8.98018	no
F08D12.3	F08D12.3	3.08964	0.000155079	7.57951	no
C28C12.2	mesp-1	3.08929	0.00505982	10.9896	no
R144.11	R144.11	3.08873	0.000442114	8.0356	no
Y54E10A.5	dnc-6	3.08735	0.00707002	8.17343	no
R12E2.10	egg-5	3.08601	0.00173351	10.8554	no
T28A8.7	mlh-1	3.08532	0.00448228	9.72784	no
T04A8.8	T04A8.8	3.0837	0.0146531	10.0221	no
H01G02.1	H01G02.1	3.0835	0.000276229	8.8261	no
F23B2.5	flp-1	3.07877	0.000813716	7.88765	no
F21H12.6	F21H12.6	3.07877	0.00212226	9.44121	no
K11H12.2	rpl-15	3.07778	0.000247599	8.56335	no
W01B6.9	ndc-80	3.07698	0.00974635	9.40431	no
ZC434.5	ears-1	3.07631	0.00627915	10.4095	no
C27H6.9	C27H6.9	3.0741	0.00367116	8.24368	no
C31H2.1	tbc-7	3.07359	0.0351193	8.17064	no
Y37E3.4	moag-4	3.07182	0.000649118	8.97945	no
F53B2.1	F53B2.1	3.07181	0.0232215	8.82146	no
B0035.3	B0035.3	3.07055	0.00422242	9.11439	no
K11B4.1	K11B4.1	3.06993	0.00230537	8.72092	no
W02G9.4	W02G9.4	3.0699	0.000440585	8.01521	no
R74.7	R74.7	3.06763	0.00171282	9.00037	no
F32A5.7	lsm-4	3.0675	0.00247302	9.15676	no
C27A2.1	smc-5	3.06702	0.0058105	9.11625	no
C03E10.5	clec-223	3.06665	0.00504977	8.14178	no
ZK1058.6	nit-1	3.06546	0.000541016	7.99799	no
T23B5.3	T23B5.3	3.06324	0.00248343	8.17	no
K08F9.4	K08F9.4	3.06161	0.00149043	9.44502	no
Y39A1A.24	Y39A1A.24	3.06024	0.00143288	9.17757	no
T16G1.11	eif-3.K	3.05915	0.0070157	8.24308	no
Y116A8C.42	snr-1	3.05871	0.00515453	8.98115	no
B0205.3	rpn-10	3.05859	0.000976002	9.25261	YES
K01G5.5	K01G5.5	3.05762	0.000240852	10.3699	no
F26F12.1	col-140	3.05757	0.000441043	13.5054	no
T20G5.9	T20G5.9	3.05701	0.00257147	8.9451	no
C27B7.1	spr-2	3.05641	0.000398671	10.1604	no
ZK1055.7	ZK1055.7	3.0552	0.00218294	8.55762	no
T13F2.10	msp-79	3.05413	0.00468968	8.01102	no
K04F10.6	mut-2	3.05217	0.00337859	9.24159	no
C27A7.5	C27A7.5	3.05173	0.000542302	8.23954	no
Y110A7A.8	Y110A7A.8	3.04981	0.00094238	9.84142	no
W04A4.2	W04A4.2	3.04963	0.000510308	7.84484	no
T25E12.5	gyg-2	3.04795	0.00104366	11.3457	no
C05C8.3	fkb-3	3.04665	0.000958652	8.70284	no
C10F3.1	cpg-4	3.04641	0.0022589	9.34557	no
Y67H2A.2	Y67H2A.2	3.04523	0.00364287	9.26857	no
T07D4.5	T07D4.5	3.04505	0.0157181	8.75464	no
C47E12.1	sars-1	3.0448	0.000592454	10.1795	no
F23F1.10	F23F1.10	3.04431	0.0037786	8.83496	no
K11G12.1	nas-11	3.04381	0.00295303	9.5257	no
F09E10.11	tts-1	3.04335	0.0138171	12.7452	no
F56D12.5	vig-1	3.04223	0.00356679	11.1039	no
F56C9.10	F56C9.10	3.04138	0.00151883	9.171	no
K07D4.8	pqn-48	3.04127	0.0367563	8.56861	no
C04A2.7	dnj-5	3.04057	0.00665479	8.6993	no
C27A2.3	ify-1	3.03942	0.000203066	9.27319	no
K03B4.1	K03B4.1	3.03773	0.00234879	9.20971	no
F30A10.5	stl-1	3.03704	0.00606876	9.95132	no
D2030.6	prg-1	3.03661	0.00537447	9.71664	no
ZK20.3	rad-23	3.03518	0.00127031	9.28952	no
F28F8.3	lsm-5	3.03457	0.00319481	8.8789	no
F29C4.6	tut-1	3.03386	0.00909187	8.9615	no
H06H21.3	eif-1.A	3.03328	0.00133781	9.69411	no
F45E4.11	F45E4.11	3.03263	0.00395324	7.79457	no
T08A9.8	spp-4	3.03157	0.000559988	9.00185	no
R11H6.2	R11H6.2	3.03068	0.000934055	10.231	no
T05E12.3	T05E12.3	3.02973	0.00167893	8.09104	no
D1054.3	D1054.3	3.02849	0.00200867	10.3935	no
F53G12.5	mex-3	3.02662	0.0128698	9.08589	no
T10H9.5	pmp-5	3.02315	0.000389773	9.9025	no
D1005.1	D1005.1	3.02192	0.00108567	8.13128	no
C29F7.4	fkh-3	3.02184	0.00390161	7.78152	no
Y53C10A.14	fbxa-123	3.02152	0.0440219	7.97342	no
C53H9.2	C53H9.2	3.02091	0.0013755	9.41212	no
Y75B12B.6	plc-2	3.0205	0.000747375	8.31813	no
Y54H5A.2	Y54H5A.2	3.02028	0.00157187	9.50234	no
B0464.2	B0464.2	3.01984	0.000581143	9.0022	no
T19C9.5	scl-25	3.01931	0.00332003	7.81944	no
K08B4.6	cpi-1	3.01837	0.00041137	11.3847	no
D1046.1	cfim-2	3.01822	0.00158165	9.17674	no
C06G3.11	tin-9.1	3.01725	0.00268897	8.80152	no
Y66A7A.6	gly-8	3.01476	0.000194065	8.43227	no
C06A8.2	C06A8.2	3.01458	0.00162879	9.81819	no
Y14H12B.1	Y14H12B.1	3.0136	0.00429618	9.51326	no
T07C12.9	T07C12.9	3.01312	0.000304075	7.84294	no
C54D1.2	clec-86	3.01252	0.000491293	7.87053	no
C46G7.4	pqn-22	3.01242	0.00126888	8.5733	no
F21D5.2	F21D5.2	3.00893	0.00291883	9.80191	no
F33D4.5	F33D4.5	3.00733	0.00262247	9.25794	no
T01C3.9	T01C3.9	3.00632	0.0123266	9.22888	no
T07C4.4	spp-1	3.00528	0.000857272	9.6514	no
T21E3.1	egg-4	3.00484	0.00148795	10.623	no
K01G5.2	hpl-2	3.00325	0.00375512	9.03525	no
F26F4.12	F26F4.12	3.00309	0.000682408	9.20445	no
T10B11.1	pcbd-1	3.00246	0.00238833	8.57401	no
C18G1.5	hil-4	3.00122	0.00089582	11.8185	no
F36F2.2	F36F2.2	3.00017	0.00130282	8.98204	no
C18F3.4	nsy-7	2.99916	0.0311932	8.16727	no
ZK652.2	tomm-7	2.99825	0.000597478	8.25742	no
C27H5.2	C27H5.2	2.99824	0.00370377	8.26917	no
K05C4.7	K05C4.7	2.99774	0.00175789	9.6534	no
K02B12.5	K02B12.5	2.99771	0.00135004	9.20896	no
ZK1073.1	ZK1073.1	2.99341	0.004102	8.02608	no
Y17G9B.3	cyp-31A3	2.99309	0.00125738	9.0497	no
T04A8.9	dnj-18	2.99192	0.00240703	9.35034	no
Y52B11A.8	Y52B11A.8	2.99108	0.000725506	10.4089	no
C38C10.2	C38C10.2	2.98863	0.00153615	9.71218	no
F58A4.4	pri-1	2.9885	0.0120445	9.45235	no
C53H9.3	C53H9.3	2.98796	0.00315746	8.35016	no
Y67H2A.6	csn-6	2.98634	0.00265546	9.01316	no
ZC513.7	ZC513.7	2.98614	0.000900072	10.2496	no
C04A2.3	egl-27	2.9842	0.0087149	9.76007	no
F52H3.7	lec-2	2.98246	0.00124944	8.81323	no
F54C9.3	F54C9.3	2.98241	0.000208428	10.012	no
C26B2.6	elpc-4	2.97667	0.00485015	9.49327	no
Y40B10A.1	lbp-9	2.97552	0.000895302	11.518	no
C18A11.7	dim-1	2.97423	0.00728653	7.54128	no
Y66D12A.17	such-1	2.97359	0.00294177	9.32686	no
B0280.1	ggtb-1	2.97314	0.0107029	9.57617	no
Y116A8C.28	bca-2	2.97302	0.00105734	8.48323	no
C18F10.7	C18F10.7	2.9725	0.000857739	8.69797	no
T19H5.4	T19H5.4	2.97237	0.00720355	8.2965	no
C33H5.11	imp-3	2.9706	0.0065846	8.2469	no
ZK652.10	tag-307	2.97006	0.000573897	9.11392	no
C18E3.2	C18E3.2	2.96975	0.000467734	9.43632	no
T07C12.12	T07C12.12	2.96868	0.00868751	8.56069	no
C07A12.4	pdi-2	2.96849	0.00240614	8.30379	no
F53A2.6	ife-1	2.96715	0.00119767	10.7054	no
ZK863.4	ZK863.4	2.96668	0.000704023	8.70259	no
K07H8.1	K07H8.1	2.96666	0.0022408	9.0556	no
C16C8.13	C16C8.13	2.96652	0.0202475	9.40101	no
F01F1.5	dpf-4	2.96485	0.000296627	9.39332	no
F20D1.2	tbc-1	2.96416	0.00111349	8.37831	no
K07A12.7	K07A12.7	2.96381	0.000460876	8.29959	no
C50E3.12	C50E3.12	2.96373	0.00888173	8.76977	no
C06A5.9	rnf-1	2.96116	0.0239365	8.52141	no
Y43F4B.6	klp-19	2.95961	0.000423253	10.0718	no
T01B11.3	syx-4	2.95949	0.00123602	8.80202	no
T21B6.1	dgn-1	2.95932	0.0218741	7.77774	no
T09B4.1	T09B4.1	2.95903	0.00233758	9.32018	no
Y97E10AL.3	Y97E10AL.3	2.95884	0.00241645	8.8014	no
T12G3.5	T12G3.5	2.9578	0.00255013	8.83617	no
T12F5.5	larp-5	2.95596	0.016721	9.23744	no
Y67H2A.4	Y67H2A.4	2.95535	0.00233235	9.62224	no
F10C2.4	F10C2.4	2.95449	0.00212013	9.09179	no
K07C5.4	K07C5.4	2.95366	0.00167764	9.4054	no
F49H12.5	F49H12.5	2.95349	0.00019386	8.49483	no
R13A5.12	lpd-7	2.95112	0.00110677	9.67007	no
F40H3.1	F40H3.1	2.95051	0.0161227	8.22676	no
K01G5.4	ran-1	2.94997	0.000172911	11.4864	no
F26E4.4	F26E4.4	2.94972	0.00828166	8.9514	no
W03B1.4	sars-2	2.94872	0.00123474	8.70642	no
C16C10.4	C16C10.4	2.94568	0.000911041	10.5802	no
B0261.2	let-363	2.94541	0.00577093	8.06561	no
D1054.2	pas-2	2.94522	0.00709975	11.4144	YES
T28B11.1	T28B11.1	2.94445	0.00349138	9.07964	no
T04C12.6	act-1	2.94439	0.00196246	12.3579	no
W05F2.3	W05F2.3	2.94427	0.00063682	9.7425	no
VF39H2L.1	syx-17	2.94378	0.00377618	9.15223	no
K09G1.1	K09G1.1	2.94196	0.000330048	8.63266	no
C02C6.3	C02C6.3	2.94179	0.00369911	8.33078	no
Y44E3A.3	Y44E3A.3	2.93777	0.0210867	8.50874	no
F18C5.2	wrn-1	2.93739	0.0268648	8.39727	no
ZK1248.11	ZK1248.11	2.93713	0.0220978	8.73069	no
F07C3.4	glo-4	2.93538	0.0144065	7.55887	no
W04D2.4	W04D2.4	2.93519	0.00534503	9.19535	no
F35G12.2	F35G12.2	2.93415	0.00148848	9.52359	no
M04F3.1	rpa-2	2.9336	0.00145544	10.2553	no
F15B9.6	F15B9.6	2.93283	0.000455712	8.30817	no
F46F11.2	cey-2	2.92998	0.000864325	11.8271	no
C34C12.8	C34C12.8	2.92913	0.00105913	10.4465	no
T23G7.5	pir-1	2.9288	0.00242337	8.87015	no
Y106G6H.15	Y106G6H.15	2.9282	0.00315579	9.18326	no
T10F2.2	T10F2.2	2.92773	0.00267	8.56819	no
H40L08.2	H40L08.2	2.92654	0.0123642	7.65746	no
F54C4.1	F54C4.1	2.92616	0.00102693	10.3654	no
K12G11.3	sodh-1	2.9243	0.0101626	8.89423	no
F49C12.14	F49C12.14	2.92192	0.00402731	7.7702	no
C25E10.8	C25E10.8	2.921	0.00107779	8.94596	no
H21P03.2	H21P03.2	2.91992	0.0257636	9.51962	no
K07B1.7	K07B1.7	2.91953	0.0138363	8.60235	no
F32D1.7	F32D1.7	2.91793	0.00145557	10.2663	no
C03D6.4	npp-14	2.9173	0.00164179	9.65037	no
F35G12.12	F35G12.12	2.91653	0.00337234	9.69579	no
F59F4.2	F59F4.2	2.91519	0.000376571	8.1655	no
F47B10.1	F47B10.1	2.91356	0.00178665	9.26632	no
Y45F10D.4	Y45F10D.4	2.91149	0.000485694	8.89169	no
ZC513.6	oma-2	2.90956	0.00868814	9.12133	no
T14B4.3	T14B4.3	2.90601	0.000928748	9.63658	no
W01G7.4	W01G7.4	2.90499	0.000713622	9.33664	no
ZK809.4	ent-1	2.90413	0.00039719	8.74078	no
F13B12.1	F13B12.1	2.90398	0.00197976	9.95618	no
T26G10.1	T26G10.1	2.90269	0.00363587	8.68778	no
ZK863.3	elpc-3	2.90142	0.000621653	8.82347	no
B0280.10	pot-1	2.90056	0.00710436	8.56199	no
ZC477.3	ZC477.3	2.9002	0.00931856	8.58692	no
F28H1.1	F28H1.1	2.89962	0.000991745	8.02975	no
Y66D12A.22	tin-10	2.8993	0.00323778	9.16709	no
F28F8.6	atx-3	2.89847	0.00496526	8.88565	no
C17G10.1	C17G10.1	2.89819	0.00484283	9.53601	no
T11F9.11	dhs-19	2.89753	0.000980396	8.66075	no
C24A11.8	frm-4	2.89637	0.000327124	8.43243	no
C49C3.7	C49C3.7	2.89581	0.00591627	9.58683	no
K08E4.6	K08E4.6	2.89476	0.018566	8.41891	no
T20F5.7	T20F5.7	2.89296	0.00038469	7.85278	no
C04F5.7	ugt-63	2.89274	0.00797887	9.0366	no
F26F4.13	kbp-2	2.89255	0.0119273	8.17244	no
Y71G12B.12	atg-5	2.89254	0.00151812	8.10105	no
F52E1.14	F52E1.14	2.88797	0.00497896	8.47298	no
Y17G7B.7	tpi-1	2.88544	0.00364416	7.80823	no
R08D7.2	R08D7.2	2.88443	0.00162367	9.90032	no
ZC395.10	ZC395.10	2.88368	0.0183924	11.5409	no
C16C8.5	C16C8.5	2.8829	0.0047028	8.23713	no
R13G10.1	dpy-27	2.88205	0.00609153	8.00307	no
C39E9.12	C39E9.12	2.88132	0.00162767	10.4305	no
F10G8.7	ercc-1	2.88062	0.0188474	8.92504	no
F59C12.4	F59C12.4	2.88051	0.00537702	8.43265	no
M01F1.6	M01F1.6	2.87941	0.0079722	8.19585	no
Y49A3A.3	Y49A3A.3	2.87743	0.00571772	9.54521	no
F22B3.4	F22B3.4	2.87706	0.0024509	9.57297	no
D1081.7	D1081.7	2.87636	0.00499167	8.35533	no
K02E2.6	K02E2.6	2.87605	0.0060591	8.04498	no
C55A6.1	C55A6.1	2.87461	0.00189901	8.95175	no
T07A9.13	tag-261	2.87167	0.00166706	8.42847	no
K06A4.5	haao-1	2.87113	0.00490361	7.75735	no
C43H6.7	C43H6.7	2.86995	0.000634422	7.75584	no
C49C3.6	C49C3.6	2.86833	0.00414423	10.1265	no
F28H6.1	akt-2	2.86787	0.00349193	8.37648	no
C36B1.14	C36B1.14	2.86767	0.0074871	8.03906	no
T07H3.6	bath-26	2.86767	0.00270532	7.9027	no
C13F10.7	C13F10.7	2.86644	0.00296694	9.00455	no
F07H5.10	F07H5.10	2.86606	0.0122917	8.95481	no
F55C10.2	col-154	2.86428	0.000436154	12.7241	no
C32E8.5	C32E8.5	2.86403	0.00797703	9.1565	no
T09A5.7	T09A5.7	2.86282	0.0115708	8.35869	no
T07A5.6	unc-69	2.86151	0.00769841	8.02156	no
Y37A1B.17	Y37A1B.17	2.86073	0.00353761	8.84429	no
F20D12.2	F20D12.2	2.86048	0.00388809	9.18081	no
Y40B10A.6	Y40B10A.6	2.86028	0.000936044	8.16839	no
ZK652.1	snr-5	2.86009	0.00168875	8.92568	no
F14E5.2	F14E5.2	2.85974	0.00523088	8.65986	no
C05D2.10	C05D2.10	2.85957	0.00270564	9.55719	no
Y48B6A.13	Y48B6A.13	2.85903	0.0155772	8.25191	no
C44B7.10	C44B7.10	2.85843	0.0019663	9.04021	no
Y56A3A.17	npp-16	2.8584	0.00159177	9.25834	no
C18B2.4	C18B2.4	2.85824	0.00468882	9.00201	no
Y56A3A.18	Y56A3A.18	2.85757	0.00031602	9.23322	no
Y73B6BL.5	seu-1	2.85647	0.00454396	8.73057	no
T22B7.7	T22B7.7	2.85479	0.00439428	10.5008	no
F32H5.1	F32H5.1	2.85397	0.00593711	8.24991	no
M106.3	M106.3	2.85383	0.000895178	8.41651	no
R186.3	R186.3	2.85329	0.000671514	9.55749	no
Y75B8A.31	Y75B8A.31	2.85135	0.000629946	9.25555	no
T19B10.3	T19B10.3	2.85116	0.000968308	8.92434	no
H28O16.1	H28O16.1	2.8509	0.00327326	11.5631	no
F13D11.4	F13D11.4	2.85002	0.00136782	8.25502	no
F11G11.2	gst-7	2.84891	0.0125756	11.4032	no
F56D6.9	F56D6.9	2.84764	0.00138542	7.74911	no
ZK40.1	acl-9	2.84673	0.000841513	9.218	no
F01G4.3	F01G4.3	2.84664	0.000701769	8.88918	no
C30C11.2	rpn-3	2.8454	0.000213491	10.6946	YES
B0273.2	puf-7	2.84532	0.0144227	10.503	no
F09E8.3	msh-5	2.84471	0.0202568	8.29072	no
F39H11.3	cdk-8	2.84401	0.00068768	9.05552	no
F13G3.7	F13G3.7	2.84344	0.0153336	7.78825	no
F35G12.4	F35G12.4	2.84337	0.00752467	8.90237	no
F31D5.3	cpna-1	2.84303	0.000243257	7.71251	no
Y49E10.6	his-72	2.84233	0.000529145	11.2847	no
T07G12.10	zim-2	2.8422	0.0068588	8.52901	no
C14B1.8	C14B1.8	2.84197	0.00516266	8.35035	no
C45G3.3	gip-2	2.84087	0.0459031	8.29473	no
T05A7.4	hmg-11	2.83967	0.00286232	8.1783	no
F17E9.4	F17E9.4	2.8394	0.00200045	8.39268	no
F52C9.3	F52C9.3	2.83926	0.00090002	8.67734	no
R09B3.3	R09B3.3	2.8385	0.0090169	10.7941	no
K07C5.3	K07C5.3	2.83731	0.00192861	9.14236	no
F49E8.1	F49E8.1	2.83625	0.00447068	9.52752	no
Y48G8AL.14	aps-3	2.83421	0.00459791	8.51275	no
F23F12.12	F23F12.12	2.83391	0.00627885	8.71417	no
C05D2.1	daf-4	2.83378	0.00643928	8.46515	no
T23G7.4	sec-5	2.83358	0.000577214	8.20805	no
F28D1.1	F28D1.1	2.83317	0.00118101	9.45919	no
C01A2.4	C01A2.4	2.83056	0.003761	8.89411	no
D1086.7	D1086.7	2.82718	0.00978105	8.56802	no
F28H1.3	aars-2	2.8261	0.000693152	9.71155	no
C29F7.2	C29F7.2	2.82454	0.000217349	8.71963	no
T06E8.1	acl-2	2.82431	0.012349	8.5735	no
T12F5.3	glh-4	2.82355	0.00271349	9.86948	no
T05D4.1	aldo-1	2.82324	0.000921168	8.92849	no
H05L03.3	H05L03.3	2.82275	0.0107775	7.67803	no
B0035.2	dnj-2	2.82197	0.00233563	9.09091	no
R12C12.7	R12C12.7	2.82102	0.00543996	9.65358	no
F09E5.8	F09E5.8	2.82095	0.00142233	8.7145	no
C35D10.4	coq-8	2.82047	0.00403516	8.43301	no
T23F2.5	T23F2.5	2.82026	0.0083334	8.3731	no
F09G2.8	F09G2.8	2.82021	0.00594169	10.0111	no
B0041.3	B0041.3	2.8196	0.00751578	8.28785	no
F55C5.4	capg-2	2.81957	0.0181285	9.4422	no
Y23H5A.7	cars-1	2.8185	0.0208139	8.88227	no
Y119D3B.13	Y119D3B.13	2.81802	0.00411432	8.32044	no
R11D1.9	R11D1.9	2.81742	0.0177748	8.63019	no
Y97E10AR.4	Y97E10AR.4	2.81675	0.0113839	8.73112	no
T13F2.8	cav-1	2.81633	0.00634734	8.26246	no
T09A5.12	ztf-17	2.81464	0.0149181	7.86774	no
ZK593.6	lgg-2	2.81356	0.000389534	8.77423	no
C36E6.1	C36E6.1	2.8133	0.000615735	9.05135	no
EGAP7.1	dpy-3	2.81318	0.00155313	10.9831	no
C29A12.3	lig-1	2.81297	0.00123123	9.39509	no
T27F7.1	T27F7.1	2.81247	0.00175654	10.5497	no
C03A3.2	C03A3.2	2.81149	0.000733157	8.61192	no
Y73B6A.5	lin-45	2.81079	0.00262112	9.76591	no
C33A12.1	C33A12.1	2.81053	0.0133519	10.8902	no
Y57G11C.43	Y57G11C.43	2.80998	0.00400831	9.04868	no
VW06B3R.1	ucr-2.1	2.80796	0.000232918	9.38544	no
ZK1127.3	ZK1127.3	2.80691	0.00207732	9.3468	no
T23B5.1	prmt-3	2.80647	0.00324452	9.10416	no
C47D12.8	C47D12.8	2.80575	0.00479184	8.88218	no
C08B6.8	C08B6.8	2.80422	0.00131691	8.66206	no
Y52B11A.9	Y52B11A.9	2.8041	0.00189912	9.65808	no
Y65B4BR.5	Y65B4BR.5	2.80341	0.000709673	12.5557	no
R04F11.3	R04F11.3	2.80296	0.00906856	8.79686	no
F02E9.5	F02E9.5	2.80247	0.00214258	8.79972	no
F13H10.5	F13H10.5	2.80192	0.0474399	7.58578	no
Y95B8A.12	Y95B8A.12	2.80134	0.0332355	7.45791	no
F57G12.1	F57G12.1	2.80102	0.0194938	8.53602	no
F38B2.4	F38B2.4	2.79949	0.000797736	8.78723	no
Y17G7A.1	hmg-12	2.79919	0.00903211	11.6638	no
ZK512.7	ZK512.7	2.79892	0.000783644	9.0361	no
C25E10.12	C25E10.12	2.79887	0.000261133	7.75364	no
C12C8.2	C12C8.2	2.79786	0.00611698	9.04443	no
F33D11.9	F33D11.9	2.79785	0.0047308	8.64878	no
T04C12.4	act-3	2.79753	0.000861868	12.471	no
D2063.3	D2063.3	2.79704	0.00175636	9.1833	no
F15B9.1	far-3	2.79457	0.00153977	10.7386	no
F26F4.10	rars-1	2.79378	0.00290685	9.07528	no
R05D8.8	dhs-14	2.79363	0.000259835	9.30825	no
F10B5.5	pch-2	2.79263	0.0144569	9.05295	no
K02F2.2	ahcy-1	2.79176	0.00175463	9.57716	no
F59A6.12	F59A6.12	2.79046	0.0159322	8.26677	no
B0205.6	B0205.6	2.78985	0.000900956	8.85504	no
K08D12.3	K08D12.3	2.7895	0.00255635	10.8224	no
F22F4.5	F22F4.5	2.78948	0.00214808	8.63735	no
Y47D3B.10	dpy-18	2.78894	0.0128851	8.9342	no
C41C4.7	ctns-1	2.78802	0.000806711	9.31818	no
K11D9.2	sca-1	2.78756	0.000497625	8.52425	no
F44E7.4	F44E7.4	2.78658	0.00866909	8.59573	no
F22B7.13	gpr-1	2.78559	0.00337288	9.1382	no
C53D5.6	imb-3	2.78545	0.000651539	10.3358	no
W04D2.5	W04D2.5	2.78432	0.000242386	10.4895	no
W02D9.5	W02D9.5	2.78319	0.00207246	8.40872	no
ZK287.5	rbx-1	2.78315	0.000702658	9.63286	no
EEED8.1	mel-47	2.78298	0.00179215	9.8814	no
W01D2.2	nhr-61	2.78003	0.00860098	8.73003	no
Y48A5A.3	Y48A5A.3	2.77834	0.00076804	8.64774	no
Y38A8.2	pbs-3	2.77814	0.00205873	9.95641	YES
F01F1.2	F01F1.2	2.77782	0.00270636	9.65195	no
F54B3.1	F54B3.1	2.77692	0.00256404	8.40996	no
Y39G10AR.20	Y39G10AR.20	2.77631	0.000907917	9.91956	no
C29F7.3	C29F7.3	2.77549	0.00638595	9.23887	no
F23H12.4	sqt-3	2.77528	0.00262002	12.8548	no
C42C1.5	tag-335	2.77476	0.00525447	8.92213	no
M05D6.5	M05D6.5	2.77473	0.00150568	7.97223	no
C52E4.3	snr-4	2.77442	0.00123004	9.16145	no
W05B10.2	ccch-3	2.77247	0.0144895	8.88478	no
C55A6.9	C55A6.9	2.77099	0.00158681	10.2415	no
F58G6.1	amph-1	2.76946	0.00149265	8.4989	no
Y110A7A.13	chp-1	2.76938	0.00556187	9.05482	no
ZK328.2	eftu-2	2.76938	0.00407628	9.7498	no
F09E5.15	prdx-2	2.76857	0.00145612	10.9621	no
F32D8.5	F32D8.5	2.76852	0.0164596	8.5057	no
C07G2.3	cct-5	2.76811	0.00376526	8.87851	no
C50F2.3	C50F2.3	2.76709	0.00923137	9.17649	no
M110.4	ifg-1	2.76697	0.00170019	7.8576	no
F57B10.5	F57B10.5	2.76529	0.000929976	8.8747	no
C24F3.6	col-124	2.76524	0.000509839	10.7673	no
Y54F10AM.8	Y54F10AM.8	2.76511	0.00479725	8.53892	no
F14H3.6	F14H3.6	2.76469	0.0045294	9.85897	no
F32D1.10	mcm-7	2.76435	0.00609667	9.65015	no
F37A4.8	isw-1	2.76275	0.0107051	9.57824	no
F11G11.11	col-20	2.76213	0.00631054	13.0999	no
Y40H7A.10	Y40H7A.10	2.76146	0.000467031	9.99127	no
R53.4	R53.4	2.76073	0.00311815	10.6389	no
F26E4.11	hrdl-1	2.76022	0.0087306	8.59398	no
C17F4.5	fbxc-50	2.75848	0.00356908	8.89583	no
C41G7.1	smn-1	2.75675	0.00332453	8.82679	no
Y49A3A.5	cyn-1	2.75667	0.0125975	10.8984	no
K07A1.12	lin-53	2.75663	0.00781635	9.89613	no
T20B3.2	tni-3	2.75587	0.0147773	7.94173	no
C16A3.4	C16A3.4	2.75428	0.00105507	9.60399	no
F49F1.6	F49F1.6	2.75359	0.0236902	8.96305	no
T22D1.10	ruvb-2	2.75333	0.00715809	8.99259	no
R53.6	R53.6	2.75146	0.00121042	9.13652	no
C07G1.3	pct-1	2.75144	0.026496	8.06995	no
M03F4.2	act-4	2.74965	0.000526375	12.415	no
Y47G6A.8	crn-1	2.74947	0.000353911	10.0024	no
W08E12.7	W08E12.7	2.74834	0.000773427	10.2199	no
ZK512.4	ZK512.4	2.74741	0.0024942	9.16924	no
B0336.7	B0336.7	2.74677	0.00378038	8.913	no
F33H1.3	F33H1.3	2.74639	0.00103086	9.78831	no
C14B1.7	C14B1.7	2.74634	0.017297	8.50257	no
F57B10.10	dad-1	2.74621	0.00488314	10.2587	no
K08D10.4	rnp-2	2.74603	0.000393978	9.939	no
W02B12.10	W02B12.10	2.74595	0.0201846	8.77866	no
F57C9.4	F57C9.4	2.74576	0.000868954	8.7057	no
C18E9.4	C18E9.4	2.74525	0.0204304	9.311	no
ZK945.3	puf-12	2.745	0.00697543	9.40237	no
T19B10.4	pqn-70	2.74407	0.00205455	9.65868	no
Y57G11C.12	nuo-3	2.74407	0.00107107	9.9357	no
T20B12.8	hmg-4	2.74341	0.00744213	9.49437	no
E02A10.1	mrps-5	2.74333	0.0032483	8.87124	no
F33A8.1	let-858	2.74329	0.00862863	8.87905	no
F25H2.5	F25H2.5	2.74251	0.000333487	13.0046	no
T20D3.6	T20D3.6	2.74232	0.0154788	8.465	no
C24D10.6	C24D10.6	2.74205	0.0272974	9.66261	no
ZK1128.2	mett-10	2.7419	0.026202	8.46947	no
F37C12.1	F37C12.1	2.74074	0.00495722	8.81768	no
C33H5.10	tag-322	2.74019	0.00267746	8.98139	no
C13B4.2	usp-14	2.73992	0.0250578	10.1186	no
B0334.3	B0334.3	2.73946	0.000318623	9.92027	no
Y66D12A.10	Y66D12A.10	2.73847	0.00117391	9.36858	no
K07A1.13	K07A1.13	2.73753	0.0112309	8.62837	no
B0041.2	ain-2	2.73727	0.00113066	8.36826	no
F49C12.7	F49C12.7	2.73699	0.0112147	8.57006	no
F16A11.2	F16A11.2	2.73692	0.0192199	8.31023	no
F23B12.6	fntb-1	2.73555	0.00203799	9.52891	no
Y39B6A.36	Y39B6A.36	2.7353	0.0129132	9.61785	no
T12E12.4	drp-1	2.7332	0.000772611	9.77788	no
M01E11.3	M01E11.3	2.73231	0.0133595	8.77369	no
Y47G6A.9	Y47G6A.9	2.73138	0.00940517	8.96752	no
F54E12.2	F54E12.2	2.73012	0.0322554	9.79574	no
Y69A2AR.5	daao-1	2.72957	0.00272971	8.13405	no
K02F3.11	rnp-5	2.72914	0.00399405	9.33097	no
Y71G12B.11	Y71G12B.11	2.72873	0.0154182	8.05103	no
K08A2.1	K08A2.1	2.72864	0.00224398	8.91269	no
C06B3.4	stdh-1	2.72833	0.00116965	9.08063	no
F32A5.4	F32A5.4	2.72713	0.0016877	8.61498	no
C37H5.5	C37H5.5	2.7271	0.00201774	9.291	no
F27D4.2	lsy-22	2.72678	0.00206138	9.03057	no
ZK524.4	ZK524.4	2.72657	0.00462427	8.76716	no
C26E6.12	C26E6.12	2.7234	0.0437902	7.74531	no
C32D5.3	C32D5.3	2.72288	0.00209204	9.24168	no
C04F5.8	C04F5.8	2.72136	0.0486011	8.75924	no
F52B11.1	F52B11.1	2.7211	0.0090588	9.00536	no
C54G4.6	dod-18	2.72101	0.0193366	8.92628	no
C14C10.4	C14C10.4	2.72002	0.0045045	8.62069	no
C50C3.5	C50C3.5	2.71857	0.0469387	7.41977	no
F45H11.2	ned-8	2.71707	0.00776519	9.24412	no
C07A9.2	C07A9.2	2.71693	0.00148405	9.27914	no
T05H4.5	T05H4.5	2.71647	0.00964135	9.9631	no
B0336.6	abi-1	2.7156	0.00129443	9.7403	no
F52B5.6	rpl-25.2	2.71538	0.00206365	13.1671	no
F08E10.7	scl-24	2.71525	0.00348056	7.71822	no
F33D11.11	vpr-1	2.71509	0.0121078	9.45076	no
F08G5.6	F08G5.6	2.7149	0.00139581	11.0474	no
C03E10.4	gly-20	2.71484	0.00445552	9.32397	no
Y73F8A.34	tag-349	2.71445	0.00372746	11.0631	no
C08B11.5	sap-49	2.71335	0.0101455	8.69534	no
F37A4.9	bath-41	2.71284	0.00291732	9.55969	no
F39H2.3	F39H2.3	2.70951	0.00338114	8.95873	no
W05B2.5	col-93	2.70876	0.0317037	8.72579	no
F09F7.7	F09F7.7	2.70839	0.000707764	8.87072	no
F14D7.2	F14D7.2	2.7078	0.00510843	9.12907	no
Y67D8C.8	cpg-9	2.70771	0.00168571	7.91416	no
MTCE.16	MTCE.16	2.70732	0.00279879	10.0455	no
ZK1320.6	arc-1	2.70646	0.0199126	8.29043	no
R05D11.3	ran-4	2.70636	0.0208761	9.3054	no
R02D3.2	cogc-8	2.70603	0.00324119	8.04322	no
K01G5.9	K01G5.9	2.70533	0.00348194	9.05766	no
Y106G6E.5	ced-12	2.70392	0.00592355	9.46581	no
C45G3.5	C45G3.5	2.7036	0.005756	8.90982	no
F38B2.1	ifa-1	2.7033	0.00210564	8.55034	no
Y51H7C.1	Y51H7C.1	2.7032	0.00119139	8.61394	no
Y47G6A.20	rnp-6	2.70235	0.0131956	9.17957	no
Y56A3A.3	mif-1	2.70232	0.000348555	9.39629	no
F10B5.8	F10B5.8	2.70181	0.00164854	9.5349	no
K08F8.1	K08F8.1	2.70095	0.00721333	8.54856	no
C01F6.3	cyp-31A1	2.70079	0.00882333	9.65079	no
C08B6.13	srxa-19	2.70007	0.0456718	7.27399	no
B0025.4	B0025.4	2.69991	0.0104885	8.959	no
Y17G9B.5	Y17G9B.5	2.6997	0.00267795	10.3443	no
F11H8.4	cyk-1	2.69932	0.000842214	7.6221	no
F08A8.1	acox-1	2.69884	0.000945027	8.95803	no
ZK829.7	ZK829.7	2.69715	0.00227068	10.4309	no
F23C8.9	F23C8.9	2.69583	0.0171614	8.95478	no
F10B5.6	emb-27	2.69488	0.0016157	9.5448	no
C41D11.8	cps-6	2.6948	0.00186119	9.10713	no
W03F8.1	tni-4	2.69362	0.000788343	7.81705	no
C49F5.3	C49F5.3	2.69339	0.029394	8.29149	no
C27B7.9	C27B7.9	2.69334	0.00276599	8.65192	no
C14A4.14	C14A4.14	2.69306	0.0487959	7.71398	no
C43E11.12	C43E11.12	2.69215	0.00149394	9.09234	no
C02F5.6	C02F5.6	2.6908	0.00420771	8.60835	no
C10H11.3	ugt-25	2.6895	0.00400119	8.35393	no
ZK632.10	ZK632.10	2.68826	0.00362753	9.03043	no
C54G7.2	mboa-3	2.68785	0.00531703	8.08094	no
C31C9.2	C31C9.2	2.68741	0.000552839	8.99453	no
F43D2.1	F43D2.1	2.68669	0.00516329	9.65662	no
C52D10.13	col-138	2.68642	0.0124503	11.6231	no
C50B8.2	bir-2	2.68514	0.0258974	8.9465	no
B0513.2	B0513.2	2.68257	0.00198651	9.95411	no
Y25C1A.8	Y25C1A.8	2.68249	0.0311545	8.07824	no
Y66D12A.9	Y66D12A.9	2.68127	0.0096264	8.6035	no
Y56A3A.11	Y56A3A.11	2.67981	0.000880327	9.29647	no
F40F9.7	F40F9.7	2.67931	0.0087564	9.48892	no
F31D4.3	fkb-6	2.67921	0.00251051	9.56152	no
C50C3.8	bath-42	2.67895	0.0152153	11.0165	no
T09F3.3	gpd-1	2.67891	0.00469292	10.9404	no
C55B7.1	glh-2	2.67846	0.00781607	8.68793	no
Y34D9A.11	spp-23	2.67835	0.012429	8.19565	no
T28A8.4	T28A8.4	2.67802	0.00868721	9.03982	no
R06C7.8	bub-1	2.67749	0.0106113	9.78014	no
ZK1307.9	ZK1307.9	2.67732	0.00632515	9.05322	no
W03C9.5	W03C9.5	2.67728	0.00983336	8.36286	no
C49H3.3	C49H3.3	2.67716	0.0421084	8.48779	no
C47E8.7	unc-112	2.67715	0.0099373	8.25099	no
W02D3.4	W02D3.4	2.67679	0.000839795	9.62565	no
T11F8.1	T11F8.1	2.67623	0.00518735	8.01974	no
F41G3.18	F41G3.18	2.67495	0.0105892	8.33621	no
C55B7.11	C55B7.11	2.67422	0.00730302	7.81749	no
W05G11.6	W05G11.6	2.67417	0.00944709	9.6259	no
F26H11.1	kbp-3	2.67317	0.00935455	8.66803	no
C50F2.6	fkb-5	2.67285	0.00411329	7.94546	no
Y54G2A.18	Y54G2A.18	2.67234	0.000697729	9.4703	no
F33D11.10	F33D11.10	2.67077	0.00549218	9.20128	no
K09A11.4	cyp-14A3	2.66823	0.00732412	8.02646	no
F49D11.8	cpn-4	2.66743	0.00968964	8.13215	no
H01A20.1	nhr-3	2.66712	0.00173137	8.13656	no
C35A5.8	C35A5.8	2.66656	0.00244772	9.44206	no
Y77E11A.11	clp-7	2.6665	0.00450268	9.02928	no
D2030.4	D2030.4	2.66525	0.00288578	10.0701	no
F56F3.1	pqn-45	2.66477	0.0107128	8.97753	no
F46C5.8	rer-1	2.6647	0.00390252	9.10628	no
Y34D9B.1	mig-1	2.664	0.0331116	7.55541	no
F08F3.7	cyp-14A5	2.66393	0.00879639	8.48996	no
M70.4	M70.4	2.66349	0.037149	8.72548	no
C26E6.7	eri-9	2.66319	0.0098093	9.41333	no
B0391.5	fbxa-153	2.6631	0.000706168	7.68193	no
F55H2.1	sod-4	2.66187	0.00125254	7.98601	no
K07A1.10	K07A1.10	2.66169	0.00659833	9.01463	no
F26D10.3	hsp-1	2.65932	0.000438074	12.4546	no
R02D3.8	R02D3.8	2.65916	0.0294597	9.99448	no
T06E6.2	cyb-3	2.6586	0.00233604	10.413	no
F30A10.9	F30A10.9	2.65857	0.00114808	9.31104	no
C47G2.4	C47G2.4	2.65793	0.00251405	8.99773	no
Y48C3A.18	Y48C3A.18	2.65781	0.0370102	7.7058	no
H27A22.1	H27A22.1	2.65664	0.00768904	8.77822	no
F54D5.11	F54D5.11	2.65645	0.00856872	10.0392	no
Y105E8A.11	Y105E8A.11	2.65591	0.000947254	9.28023	no
C36E8.5	tbb-2	2.65477	0.00492516	12.1565	no
C27F2.4	C27F2.4	2.65416	0.00131691	9.12688	no
F09G2.4	cpsf-2	2.65408	0.000715334	8.86408	no
Y47G6A.33	Y47G6A.33	2.65385	0.00048887	9.07588	no
Y37H9A.5	Y37H9A.5	2.65362	0.000914332	9.31798	no
Y49F6B.9	Y49F6B.9	2.65175	0.00254238	8.8059	no
T23D8.9	sys-1	2.65135	0.0110455	7.90639	no
ZK1307.8	ZK1307.8	2.65117	0.0393404	9.78076	no
C09H10.3	nuo-1	2.65075	0.00249356	10.6527	no
Y57A10B.3	btb-14	2.6507	0.00104815	8.72033	no
K08D10.3	rnp-3	2.65056	0.00875508	9.00601	no
F25B4.7	F25B4.7	2.65056	0.0010031	9.33293	no
Y57G11C.13	arl-8	2.64972	0.00241997	10.2725	no
C02F5.7	C02F5.7	2.64933	0.00519392	8.39604	no
Y46E12BL.3	spsb-2	2.64821	0.0040339	9.39929	no
K08E4.1	spt-5	2.64756	0.00288054	9.23214	no
C38C3.5	unc-60	2.64637	0.00400633	8.99701	no
F54E7.1	pst-2	2.64602	0.00417437	8.47715	no
W06H8.8	ttn-1	2.64598	0.00436538	9.63128	no
F41C3.3	acs-11	2.6459	0.000435971	9.22329	no
Y43F11A.5	set-24	2.64451	0.00773169	8.17168	no
Y53G8AL.2	Y53G8AL.2	2.64431	0.000989208	10.5655	no
Y94H6A.10	Y94H6A.10	2.64373	0.00872252	8.71972	no
T23E7.2	T23E7.2	2.64331	0.00657395	8.67634	no
F38A3.2	ram-2	2.64325	0.00181209	12.5203	no
C09B8.6	hsp-25	2.64284	0.000564082	9.03203	no
F18G5.6	F18G5.6	2.64086	0.00222418	8.15604	no
C32H11.4	C32H11.4	2.64033	0.00158769	9.85091	no
C03D6.6	lab-1	2.64031	0.0146921	8.99824	no
Y40D12A.1	Y40D12A.1	2.63947	0.0101728	8.36526	no
C35D10.1	C35D10.1	2.63938	0.00678239	9.76198	no
W08E12.3	W08E12.3	2.63916	0.0088007	9.51183	no
K01C8.7	K01C8.7	2.63843	0.0252333	8.8069	no
ZK377.2	sax-3	2.6382	0.00250045	7.51219	no
W09D12.1	W09D12.1	2.63809	0.00680421	8.99723	no
F37B12.1	F37B12.1	2.6375	0.000664729	7.70032	no
C26D10.1	ran-3	2.63699	0.0025181	8.7631	no
ZK1251.6	msp-76	2.63685	0.0216989	8.14364	no
F55A12.1	F55A12.1	2.63518	0.0015586	9.04657	no
F56D5.5	F56D5.5	2.63495	0.0111301	7.55994	no
T07D4.3	rha-1	2.63444	0.0041111	8.65264	no
T26A5.4	T26A5.4	2.63417	0.0048058	9.16397	no
T01B7.5	T01B7.5	2.63415	0.000998812	9.50086	no
R07E5.14	rnp-4	2.63359	0.00368145	10.415	no
F42A8.3	F42A8.3	2.63144	0.00197688	10.016	no
Y69A2AR.18	Y69A2AR.18	2.6291	0.00205354	8.01437	no
F59A2.3	cri-3	2.62908	0.000660067	10.0804	no
F11A10.8	cpsf-4	2.6284	0.00790152	9.24456	no
C05C8.5	C05C8.5	2.62832	0.0140976	8.91952	no
ZK945.7	ZK945.7	2.62829	0.0460163	7.33357	no
F29G9.5	rpt-2	2.62785	0.00153908	9.77122	YES
C50B8.1	C50B8.1	2.62728	0.00426452	9.13122	no
C24H10.5	cal-5	2.62709	0.00137615	8.94603	no
C05E11.1	lnp-1	2.62604	0.00147098	7.91253	no
Y54G9A.5	Y54G9A.5	2.6252	0.00320324	9.16127	no
ZK652.9	coq-5	2.62518	0.003231	9.37989	no
R12H7.5	skr-20	2.62501	0.0043433	8.07131	no
T08A9.1	atg-11	2.62339	0.0131903	7.97331	no
Y11D7A.3	Y11D7A.3	2.62288	0.0074464	8.24459	no
K01C8.10	cct-4	2.62256	0.00113179	10.2606	no
K06H7.9	idi-1	2.62187	0.0134971	9.08142	no
F58A4.3	hcp-3	2.62184	0.00178915	9.16333	no
C03B1.12	lmp-1	2.62119	0.00104156	9.88051	no
B0495.8	B0495.8	2.62117	0.00516364	9.32659	no
C03G5.12	nspc-5	2.62106	0.00176036	8.03633	no
C33H5.7	swd-2.2	2.62036	0.00797671	8.89356	no
K10D3.3	taf-11.2	2.61983	0.0212365	9.12323	no
T05B9.1	T05B9.1	2.61944	0.00570437	10.6233	no
C14B1.2	C14B1.2	2.61919	0.00808277	10.6726	no
D2013.7	eif-3.F	2.61761	0.000438234	9.34394	no
F33G12.7	F33G12.7	2.61683	0.00122727	9.16029	no
C26E6.9	set-2	2.61576	0.0467207	8.42739	no
Y32F6A.1	set-22	2.61561	0.00473354	9.27834	no
F28C6.6	suf-1	2.61495	0.0241747	8.56558	no
F01F1.6	alh-9	2.61493	0.00119854	10.071	no
C27C12.7	dpf-2	2.61346	0.000319099	8.39388	no
M176.2	M176.2	2.61311	0.00459129	9.1579	no
C11G6.3	C11G6.3	2.61309	0.0316967	7.74021	no
R11A8.5	R11A8.5	2.61218	0.00384947	9.43828	no
ZK643.2	ZK643.2	2.61194	0.026249	8.72088	no
C41G11.1	C41G11.1	2.61044	0.000847485	9.21794	no
Y71D11A.2	smr-1	2.60981	0.0020242	10.1093	no
F11C7.5	osm-11	2.60916	0.00221453	8.73881	no
Y61A9LA.3	Y61A9LA.3	2.60916	0.013615	8.13814	no
F21C3.4	rde-2	2.60848	0.00203927	9.09513	no
T10F2.1	gars-1	2.60735	0.00622372	9.76741	no
Y37D8A.10	Y37D8A.10	2.60603	0.000689472	10.5231	no
Y71F9AL.13	rpl-1	2.6059	0.00273147	10.5721	no
C14C10.2	C14C10.2	2.60464	0.00170746	7.89409	no
H20J04.8	sap-1	2.60407	0.011141	8.90924	no
D1081.6	D1081.6	2.60406	0.0358326	7.48791	no
T21B10.5	set-17	2.60404	0.00301213	8.90268	no
C53A5.1	ril-1	2.60392	0.00574998	10.9415	no
Y48E1B.9	clec-146	2.60385	0.00180354	9.34502	no
Y77E11A.13	npp-20	2.60307	0.00241183	8.03033	no
C13F10.6	C13F10.6	2.60296	0.0056754	8.71687	no
C27H5.3	fust-1	2.60233	0.00101505	8.8497	no
K07C11.2	air-1	2.602	0.000681191	9.36165	no
W09D10.3	W09D10.3	2.6015	0.0222228	9.1985	no
Y57A10A.16	Y57A10A.16	2.59994	0.00545635	8.3809	no
F23C8.4	ubxn-1	2.59971	0.00680237	8.80709	no
C07B5.5	nuc-1	2.59926	0.000348473	10.7769	no
C04G2.6	dis-3	2.59886	0.00289341	8.90629	no
F55G1.11	his-60	2.59866	0.0050944	9.73903	no
T25G3.2	chs-1	2.59819	0.000874298	11.1604	no
Y104H12D.1	mdt-20	2.59753	0.0242915	8.9809	no
F23D12.11	F23D12.11	2.59601	0.00520439	10.1971	no
F32G8.6	cat-4	2.59575	0.00262867	9.47184	no
F56A3.2	slx-1	2.59552	0.00244298	9.24387	no
K02B12.3	sec-12	2.59537	0.00804344	9.16706	no
T04A8.10	sel-13	2.59499	0.0021201	9.19424	no
C14B1.1	pdi-1	2.59331	0.0105136	11.2921	no
B0244.8	egg-1	2.59297	0.00808199	8.66494	no
F32E10.2	F32E10.2	2.59255	0.0175099	8.35232	no
Y62E10A.11	mdt-9	2.59154	0.00105794	9.57954	no
F38A1.5	clec-166	2.59127	0.00401419	7.7263	no
F37B4.7	folt-2	2.59124	0.0129832	8.23806	no
Y47G6A.25	Y47G6A.25	2.59109	0.00992887	7.57341	no
F26E4.6	F26E4.6	2.59004	0.00125956	10.819	no
F45G2.7	F45G2.7	2.58925	0.0449468	8.06065	no
Y43F4B.4	npp-18	2.58816	0.0221564	8.96863	no
W03F8.4	W03F8.4	2.58715	0.00408226	9.38628	no
ZK353.7	cutc-1	2.58659	0.00966522	8.97669	no
F40E10.3	csq-1	2.58628	0.00258061	10.6471	no
R07E5.10	pdcd-2	2.58504	0.00604748	9.47251	no
W01A8.4	nuo-6	2.58481	0.000419198	11.0846	no
C02B10.4	C02B10.4	2.58467	0.0022593	9.90992	no
F33H2.5	F33H2.5	2.58422	0.0427691	8.69741	no
F53F4.3	F53F4.3	2.58401	0.010806	8.46339	no
C34G6.4	pgp-2	2.58389	0.0490277	7.95855	no
Y57G11C.34	Y57G11C.34	2.58197	0.00145274	9.24436	no
F23F1.8	rpt-4	2.58132	0.00100107	9.85916	YES
B0393.9	B0393.9	2.58112	0.0113354	8.36968	no
R13A5.1	cup-5	2.58046	0.0220139	9.06425	no
Y18D10A.20	pfn-1	2.58036	0.000654986	10.1932	no
F43G9.5	cfim-1	2.57827	0.0186826	9.46654	no
F44G4.1	F44G4.1	2.57802	0.00289301	9.1412	no
M142.8	M142.8	2.57641	0.00366378	8.71215	no
C44B7.11	C44B7.11	2.57627	0.00421854	7.92372	no
F11G11.1	gst-8	2.57511	0.000720556	9.91821	no
T07C12.14	T07C12.14	2.57501	0.00975034	9.08832	no
F53A2.4	nud-1	2.57248	0.000752621	10.6842	no
Y18D10A.19	fkb-2	2.57091	0.0034043	11.0271	no
C30E1.9	C30E1.9	2.57065	0.000528736	8.10993	no
T23D8.4	eif-3.C	2.57058	0.00260246	10.0194	no
T06D10.1	rsbp-1	2.5702	0.0461084	8.25153	no
ZK686.2	ZK686.2	2.5687	0.0136924	8.86599	no
C06H2.6	C06H2.6	2.56854	0.00768081	8.27496	no
C03G6.14	cyp-35A1	2.56789	0.0139217	7.76343	no
R02F2.7	R02F2.7	2.56768	0.00721062	9.06251	no
F56B3.11	F56B3.11	2.56767	0.00317822	9.76785	no
F15B10.1	F15B10.1	2.56727	0.00173013	9.8436	no
F21C3.3	hint-1	2.56723	0.00805199	9.11168	no
F02A9.3	far-2	2.56674	0.000478109	13.6192	no
T19E7.2	skn-1	2.56622	0.00795315	8.90477	no
T13F2.11	msp-78	2.56594	0.0125109	7.88867	no
R13.3	R13.3	2.56578	0.0390578	7.45182	no
F38A6.3	hif-1	2.56507	0.00877773	8.57315	no
ZK721.2	unc-27	2.56475	0.000506371	10.7364	no
ZC410.2	mppb-1	2.56406	0.00158179	9.77041	no
ZK973.9	ZK973.9	2.56404	0.0195797	9.10266	no
K03E6.6	pfn-3	2.5638	0.010353	8.26497	no
F59A3.12	F59A3.12	2.56345	0.00412331	8.90404	no
C07H6.4	C07H6.4	2.56268	0.00595449	8.9705	no
F46C5.9	F46C5.9	2.5624	0.0211265	9.79942	no
Y48C3A.16	Y48C3A.16	2.56215	0.000970425	9.04767	no
ZK632.6	cnx-1	2.56206	0.00236505	10.7151	no
W02F12.5	W02F12.5	2.56078	0.00273441	11.6991	no
C34E10.1	gop-3	2.56064	0.00108501	9.10999	no
K10B3.7	gpd-3	2.56052	0.000633455	11.859	no
F13H10.2	ndx-9	2.56049	0.00595844	9.19492	no
W02D9.1	pri-2	2.55972	0.00117366	9.35199	no
D2024.5	D2024.5	2.55963	0.00267255	9.07328	no
F14F7.1	col-98	2.5594	0.0182183	11.3447	no
F53F4.10	F53F4.10	2.55902	0.0050644	10.8273	no
C10H11.10	kca-1	2.559	0.0049287	9.03691	no
F46E10.10	mdh-1	2.55812	0.00338185	9.7571	no
Y116A8C.30	Y116A8C.30	2.55778	0.00543549	8.93696	no
C44C11.1	ras-1	2.55759	0.00195172	8.45573	no
Y110A7A.14	pas-3	2.55694	0.00124004	10.0594	YES
Y39G10AL.3	cdk-7	2.55673	0.00602946	9.36208	no
Y51H1A.3	Y51H1A.3	2.55663	0.00329686	10.4807	no
R05F9.10	sgt-1	2.55615	0.00190232	10.073	no
T01C8.5	T01C8.5	2.55509	0.00695535	8.18179	no
F38E1.9	F38E1.9	2.55274	0.00139899	9.50203	no
F15D4.3	rmo-1	2.55191	0.00195124	8.44404	no
T28B8.1	T28B8.1	2.5519	0.000613403	8.63742	no
C07H6.6	clk-2	2.5511	0.00280526	9.34942	no
Y44E3A.6	Y44E3A.6	2.55044	0.00705464	8.58617	no
F07G6.10	F07G6.10	2.54956	0.000810851	7.68917	no
Y49E10.15	snr-6	2.54954	0.0053508	9.91189	no
R11A8.2	R11A8.2	2.54875	0.00337382	9.24498	no
F15E6.3	F15E6.3	2.54842	0.00512823	9.74151	no
ZK39.6	clec-97	2.54802	0.00239486	8.70117	no
ZK673.2	ZK673.2	2.54654	0.00117808	9.27178	no
Y56A3A.29	ung-1	2.54615	0.0135958	8.82511	no
C06G3.9	C06G3.9	2.54533	0.0168723	9.24711	no
F08F1.4	F08F1.4	2.54404	0.0219858	8.9312	no
Y53F4B.15	asc-1	2.54297	0.00967624	9.72089	no
B0464.8	tag-342	2.54191	0.0265638	9.39288	no
M110.5	dab-1	2.54157	0.000812226	9.10195	no
F26H11.2	nurf-1	2.54156	0.00524443	9.31167	no
C36B1.3	rpb-3	2.54045	0.00440289	10.1207	no
Y54H5A.3	tag-262	2.53985	0.00514957	8.21345	no
T25F10.6	T25F10.6	2.53952	0.000389231	9.6744	no
F14F3.3	mboa-7	2.53949	0.00188905	7.90563	no
M01F1.4	M01F1.4	2.53868	0.00911223	8.62131	no
Y22D7AL.9	Y22D7AL.9	2.53839	0.0283398	7.5342	no
Y54E2A.8	Y54E2A.8	2.5383	0.0123297	7.66175	no
K10C8.1	K10C8.1	2.53794	0.0017727	8.50176	no
ZK418.5	ZK418.5	2.53793	0.00327511	9.55477	no
H06H21.6	ubxn-6	2.53703	0.0048525	10.892	no
F36H2.2	F36H2.2	2.53675	0.00186759	9.6278	no
Y87G2A.10	vps-28	2.53654	0.000959974	9.84575	no
C23H3.3	C23H3.3	2.53514	0.00498577	8.52193	no
C10C6.6	C10C6.6	2.534	0.00127069	9.57659	no
D1014.3	snap-1	2.53326	0.0116011	8.81769	no
ZC308.4	ZC308.4	2.53271	0.0155997	8.85894	no
ZK1151.1	vab-10	2.53244	0.0139745	7.96914	no
ZK1128.8	vps-29	2.53202	0.00559935	8.68664	no
C13G5.2	C13G5.2	2.53196	0.0275802	9.27644	no
F20C5.1	pme-3	2.53189	0.0092884	9.00036	no
F49C12.11	F49C12.11	2.53127	0.00563124	10.1504	no
F28D1.3	thn-1	2.53097	0.000803229	10.1262	no
T02E1.3	gla-3	2.53085	0.00913756	8.82037	no
F25H2.9	pas-5	2.53057	0.0013259	10.8968	YES
C50F4.14	C50F4.14	2.53048	0.00196516	9.34731	no
Y47H9C.2	dhhc-2	2.53045	0.0374362	7.58045	no
Y71H2AM.20	Y71H2AM.20	2.53044	0.0256726	8.41566	no
F08F3.6	F08F3.6	2.53013	0.0497496	8.51047	no
F22A3.7	ttr-36	2.52977	0.015606	8.66398	no
C49A9.10	C49A9.10	2.5296	0.0298605	8.09781	no
C05C12.4	C05C12.4	2.52913	0.0182355	8.36931	no
Y54E5A.5	Y54E5A.5	2.52833	0.00876589	9.73378	no
Y119D3B.12	Y119D3B.12	2.5277	0.0197182	8.5629	no
T21C9.13	T21C9.13	2.52689	0.0022351	10.5711	no
F43G9.9	cpn-1	2.52552	0.00672388	10.7739	no
M176.8	M176.8	2.52546	0.00592324	7.9603	no
F43H9.4	F43H9.4	2.52544	0.022777	8.0501	no
C28D4.1	nhr-100	2.52513	0.0056528	8.13095	no
F33A8.3	cey-1	2.52351	0.000555156	11.0314	no
T06D8.9	T06D8.9	2.52326	0.00410172	10.3608	no
R144.6	R144.6	2.5228	0.00198563	8.8445	no
F54D10.7	F54D10.7	2.52241	0.0260938	9.31575	no
T24H7.2	T24H7.2	2.5214	0.0015388	9.02698	no
K08E7.3	let-99	2.52087	0.00360965	8.45957	no
C16C10.2	C16C10.2	2.52086	0.00107533	9.56623	no
Y66D12A.15	Y66D12A.15	2.5208	0.0229268	8.55601	no
F40F8.1	F40F8.1	2.52044	0.00225741	9.97613	no
M03B6.4	M03B6.4	2.52019	0.0124977	7.52856	no
T03F1.12	T03F1.12	2.51916	0.00424819	7.63119	no
C25A1.4	C25A1.4	2.51903	0.000927033	9.06652	no
C29A12.1	C29A12.1	2.519	0.000946266	9.27369	no
R12C12.9	R12C12.9	2.51885	0.000907654	8.46969	no
Y76A2B.5	Y76A2B.5	2.51749	0.00435633	9.29642	no
C34B2.8	C34B2.8	2.51746	0.000718522	10.2018	no
B0304.2	B0304.2	2.51731	0.0172724	7.92484	no
Y59A8B.12	Y59A8B.12	2.51705	0.00325778	9.47787	no
F01G4.6	F01G4.6	2.51686	0.00556528	10.6158	no
C08B11.1	zyg-11	2.51588	0.00137299	10.9047	no
Y38F2AR.3	Y38F2AR.3	2.51504	0.00230284	8.27335	no
F59H6.9	bath-1	2.51429	0.00307934	7.99731	no
F38A5.13	dnj-11	2.51375	0.00202661	8.50336	no
C08B6.7	C08B6.7	2.51358	0.00191506	10.2538	no
DY3.8	DY3.8	2.51356	0.0222193	9.41951	no
Y34D9A.6	glrx-10	2.51339	0.00149156	7.994	no
Y69A2AR.1	Y69A2AR.1	2.5133	0.00634939	10.1275	no
C11E4.1	C11E4.1	2.51302	0.00729224	8.3396	no
C29F9.3	C29F9.3	2.51159	0.0179166	7.88635	no
Y37D8A.9	mrg-1	2.51125	0.000414199	9.97896	no
D1007.8	D1007.8	2.5111	0.0136775	8.54889	no
R01H10.1	div-1	2.51064	0.0189771	8.90294	no
H36L18.2	H36L18.2	2.50908	0.000553906	8.98301	no
C33F10.9	msp-40	2.50899	0.0167651	7.29875	no
M01H9.3	M01H9.3	2.50852	0.00109539	8.46837	no
F59C6.5	F59C6.5	2.50829	0.00140315	10.5371	no
C47A10.1	pgp-9	2.50685	0.00997923	8.48388	no
C54C8.12	C54C8.12	2.50651	0.00118067	7.55475	no
T07C4.1	umps-1	2.50569	0.0112189	8.88648	no
W06H3.2	pus-1	2.50548	0.000957159	9.34831	no
C03B8.2	C03B8.2	2.5052	0.00845457	8.19307	no
Y39A3CR.1	smi-1	2.50403	0.00664311	9.19031	no
T23G11.3	gld-1	2.5019	0.014778	9.2419	no
M03A8.1	dhs-28	2.50073	0.00260221	8.64593	no
C05C10.7	C05C10.7	2.49956	0.0222302	8.30256	no
B0212.3	B0212.3	2.49901	0.0147454	8.87437	no
F57C9.1	F57C9.1	2.49787	0.0261834	8.39669	no
C07H6.5	cgh-1	2.49753	0.00232219	9.95727	no
W01F3.2	W01F3.2	2.49663	0.0111841	9.50213	no
F52E1.10	vha-18	2.49613	0.00157856	9.9929	no
T10C6.6	T10C6.6	2.49609	0.0132687	9.6075	no
C14F5.4	sfxn-2	2.49502	0.0251016	8.10025	no
F55A12.5	F55A12.5	2.49426	0.0245159	8.9432	no
F49E12.2	dod-23	2.49362	0.000968684	9.4388	no
K06A5.6	acdh-3	2.49355	0.00340334	10.8785	no
F59E12.4	npl-4.1	2.49226	0.0152529	11.082	no
F52C6.3	F52C6.3	2.49216	0.0111051	7.86748	no
R05D7.4	R05D7.4	2.49211	0.0233118	8.9776	no
E04F6.4	E04F6.4	2.49177	0.0116684	7.44847	no
T06D8.8	rpn-9	2.49071	0.00263095	10.837	YES
Y111B2A.18	rsp-3	2.49026	0.00694486	9.92467	no
R13H4.2	R13H4.2	2.48973	0.00331762	9.16414	no
F42F12.1	nspc-9	2.48969	0.00185101	7.69974	no
D2023.8	D2023.8	2.48886	0.00768276	8.80223	no
T05F1.4	T05F1.4	2.48797	0.0102657	8.87916	no
D2030.1	D2030.1	2.48731	0.0147813	9.46345	no
F56H1.7	F56H1.7	2.487	0.00248115	10.0783	no
B0205.12	B0205.12	2.4864	0.010604	7.71513	no
B0350.2	unc-44	2.48622	0.000822704	8.37892	no
Y49F6C.8	Y49F6C.8	2.48494	0.0146365	8.59453	no
Y37D8A.2	Y37D8A.2	2.48388	0.000509896	11.034	no
T09B4.9	T09B4.9	2.48337	0.015703	8.61746	no
B0213.14	cyp-34A8	2.48272	0.048603	8.40429	no
C14C10.3	ril-2	2.48252	0.00161314	9.52919	no
C10C6.5	wht-2	2.48206	0.0050554	9.26708	no
F33H2.3	F33H2.3	2.48179	0.0191927	9.84849	no
ZK909.6	ZK909.6	2.48172	0.0300311	9.02356	no
R07B7.6	R07B7.6	2.48144	0.0110799	8.12995	no
F09E5.11	F09E5.11	2.4808	0.0250125	9.21797	no
T10H9.4	snb-1	2.48024	0.00268292	10.5815	no
F22D6.3	nars-1	2.47984	0.0216596	9.29635	no
R13F6.1	kbp-1	2.47947	0.00817327	7.85743	no
ZK809.3	ZK809.3	2.47892	0.00119282	10.3851	no
Y20C6A.2	fbxb-7	2.47876	0.00518028	8.11372	no
T24H7.5	tat-4	2.47799	0.00309549	9.8701	no
W02B12.1	W02B12.1	2.47739	0.00485729	9.07182	no
B0464.1	dars-1	2.47698	0.00540021	10.3295	no
W02D7.7	sel-9	2.47684	0.0015647	9.47498	no
H14N18.1	unc-23	2.47679	0.00142814	7.87146	no
F26B1.2	F26B1.2	2.47667	0.000448627	9.40121	no
W10D5.3	gei-17	2.47637	0.00478628	9.17531	no
F26F4.8	F26F4.8	2.47473	0.0104537	7.83744	no
R31.2	R31.2	2.474	0.00905751	8.17209	no
Y71F9B.10	sop-3	2.47353	0.00639953	9.22506	no
F54E7.3	par-3	2.47352	0.00181479	9.74717	no
M116.2	M116.2	2.47345	0.0109496	10.075	no
ZK856.8	ZK856.8	2.4731	0.00126881	10.5264	no
F18H3.5	cdk-4	2.47279	0.0245882	8.42288	no
C06H2.7	C06H2.7	2.47127	0.000650651	8.61338	no
B0454.5	B0454.5	2.47074	0.0108889	8.45461	no
R05H5.5	R05H5.5	2.4707	0.0222932	8.86389	no
ZK593.8	fic-1	2.47015	0.011862	8.97065	no
K04G2.5	ath-1	2.46945	0.00190894	9.15742	no
F26E4.8	tba-1	2.4686	0.00196458	12.034	no
T13B5.3	pho-14	2.46853	0.000884147	10.7896	no
T05G5.5	T05G5.5	2.46784	0.0128361	9.51447	no
F37F2.2	F37F2.2	2.46713	0.00272297	11.4971	no
C24G6.1	syp-2	2.46656	0.042752	8.85075	no
C27F2.9	C27F2.9	2.46552	0.0113018	8.93347	no
T20G5.14	T20G5.14	2.46532	0.00675521	9.93935	no
ZK455.7	pgp-3	2.46519	0.0156563	8.87268	no
F40F8.5	F40F8.5	2.46479	0.000720496	9.74893	no
F54C1.7	pat-10	2.46441	0.000744012	12.6208	no
Y45F10C.3	fbxa-215	2.46417	0.0243197	9.24345	no
Y43F8B.2	Y43F8B.2	2.46406	0.00268935	8.66373	no
ZK1248.10	tbc-2	2.46268	0.00763784	9.09366	no
B0207.4	air-2	2.46187	0.0110367	8.45494	no
F54D7.6	F54D7.6	2.46143	0.00559952	10.512	no
ZK1128.5	tag-246	2.46136	0.00753515	8.35872	no
C06C3.1	mel-11	2.46124	0.000834651	7.59202	no
F29G9.3	aps-1	2.46008	0.0025587	9.14336	no
C28D4.2	cka-1	2.45934	0.000997334	8.97612	no
C47E8.5	daf-21	2.45876	0.00184622	12.6693	no
H20J04.5	pfd-2	2.45874	0.00244512	8.86818	no
Y51H7C.5	Y51H7C.5	2.45828	0.000809839	7.99588	no
B0464.7	baf-1	2.45772	0.00364348	10.8873	no
W09C3.4	W09C3.4	2.457	0.0377612	8.47718	no
Y67D2.4	Y67D2.4	2.45657	0.00397866	7.72848	no
T12D8.8	hip-1	2.45644	0.00293413	8.87194	no
F41H10.10	htp-1	2.45539	0.0146522	9.05662	no
T05E11.5	imp-2	2.45528	0.00202286	10.4154	no
Y39A3CL.1	Y39A3CL.1	2.45453	0.0157425	8.06987	no
R03A10.5	R03A10.5	2.45451	0.0141969	8.15467	no
T05H4.10	T05H4.10	2.45441	0.00513387	9.05507	no
F53C11.4	F53C11.4	2.45392	0.00130653	9.80851	no
Y47G6A.24	mis-12	2.45315	0.0326912	8.889	no
W02A11.1	W02A11.1	2.45304	0.00836354	8.80872	no
Y69H2.14	Y69H2.14	2.45248	0.00724239	13.1527	no
F26E4.7	F26E4.7	2.45236	0.026405	7.91125	no
F18A1.5	rpa-1	2.45182	0.00560359	8.92407	no
C32E8.9	C32E8.9	2.45128	0.00280683	8.6789	no
C36A4.2	cyp-25A2	2.45114	0.0018053	9.71907	no
ZK1320.9	ZK1320.9	2.4499	0.00303255	9.19909	no
K11C4.4	odc-1	2.44744	0.00226266	8.72556	no
R05H5.4	R05H5.4	2.44644	0.0342479	8.44355	no
T27C4.4	lin-40	2.44542	0.0207098	7.88049	no
ZK180.4	sar-1	2.44475	0.00482741	8.67273	no
M04F3.4	M04F3.4	2.44459	0.0200951	8.28136	no
F52H3.2	F52H3.2	2.44376	0.00455537	8.49798	no
F42A10.1	abcf-3	2.44355	0.00855326	9.28035	no
Y59A8B.10	Y59A8B.10	2.44336	0.0200189	9.10399	no
C44B7.2	C44B7.2	2.44249	0.0106186	8.38017	no
F54B8.4	F54B8.4	2.44213	0.015091	7.42817	no
F46B6.3	smg-4	2.4421	0.0120946	8.0607	no
F57C9.5	htp-3	2.44195	0.0204524	9.04902	no
T21H3.3	cmd-1	2.44087	0.00487404	8.85324	no
K04G7.4	nuo-4	2.44081	0.000871696	10.3089	no
R01B10.6	R01B10.6	2.44002	0.00932441	7.97295	no
C29E4.3	ran-2	2.43953	0.00288142	9.18031	no
F21H11.2	sax-2	2.43903	0.012931	9.551	no
F25G6.9	F25G6.9	2.43874	0.010679	9.10784	no
ZK20.4	ZK20.4	2.43752	0.02849	8.14952	no
Y49E10.1	rpt-6	2.43737	0.000811513	9.00662	YES
F37E3.1	ncbp-1	2.43728	0.0157159	9.20014	no
R01H2.3	egg-2	2.43727	0.000962622	10.6188	no
W06E11.4	sbds-1	2.43688	0.0149549	9.14145	no
T04D3.5	T04D3.5	2.43624	0.0363554	8.64777	no
K07C11.5	cri-2	2.43566	0.0043212	7.9356	no
W04D2.6	W04D2.6	2.43522	0.00272027	8.91539	no
C47E12.5	uba-1	2.43492	0.00270357	10.2722	no
D1022.7	aka-1	2.43241	0.00942974	9.44416	no
Y37A1C.1	nkcc-1	2.43161	0.00595774	8.89881	no
F10B5.2	F10B5.2	2.43137	0.00260482	9.55735	no
R107.5	R107.5	2.42905	0.0073304	10.1941	no
K08E7.1	eak-7	2.42813	0.00762097	9.06004	no
W02B12.15	W02B12.15	2.42812	0.00228737	8.74855	no
Y39C12A.8	dnj-26	2.42795	0.0195839	8.53226	no
F48E8.3	F48E8.3	2.42769	0.00712234	8.99553	no
K02A11.4	K02A11.4	2.42759	0.0275306	7.69867	no
F09E5.3	F09E5.3	2.42729	0.00275101	9.65714	no
Y102E9.2	Y102E9.2	2.42693	0.0164028	7.87777	no
F11A10.5	F11A10.5	2.42692	0.0068894	9.04363	no
F55C5.5	tsfm-1	2.42688	0.00980826	9.33974	no
C08F8.9	C08F8.9	2.42666	0.0306238	8.80185	no
C01F6.4	fem-3	2.42581	0.0332118	9.05571	no
K07C5.6	K07C5.6	2.4258	0.0124408	9.17821	no
T02G5.9	kars-1	2.42574	0.0154736	10.5574	no
T08D2.3	T08D2.3	2.42555	0.0231816	8.22818	no
R74.3	xbp-1	2.42553	0.0144912	8.27401	no
C44C1.1	C44C1.1	2.42543	0.012052	8.31162	no
C01B12.8	C01B12.8	2.42532	0.0191001	8.14225	no
R53.5	R53.5	2.42473	0.00117194	9.33813	no
F35H10.10	F35H10.10	2.42458	0.00418847	8.25484	no
Y55F3AM.12	dcap-1	2.42456	0.00349422	7.76721	no
Y105C5B.5	Y105C5B.5	2.42384	0.00821376	9.03106	no
Y39A3CR.4	ddp-1	2.42374	0.00831423	9.29439	no
C17G10.5	lys-8	2.42334	0.00885975	12.3191	no
C18E3.9	C18E3.9	2.42331	0.00918559	9.23847	no
Y57G11C.40	Y57G11C.40	2.4222	0.0456946	7.7363	no
Y57G11C.16	rps-18	2.42078	0.0121222	11.3759	no
C14B1.6	C14B1.6	2.42031	0.0422293	8.4849	no
M7.1	let-70	2.41969	0.00386328	10.1713	no
F44E5.1	F44E5.1	2.41917	0.00362461	10.6011	no
Y34D9A.4	spd-1	2.41841	0.00969625	8.89014	no
K02G10.6	hyl-2	2.41669	0.00500491	9.28097	no
F58H7.2	faah-3	2.41614	0.00428746	9.05525	no
T07G12.12	him-8	2.41565	0.00212938	9.01238	no
H42K12.1	pdk-1	2.41459	0.0122267	8.48464	no
K04G2.1	iftb-1	2.41439	0.00232274	10.515	no
F56D2.7	ced-6	2.41384	0.0153302	9.31054	no
K09D9.1	K09D9.1	2.41326	0.0071818	8.32501	no
K12C11.2	smo-1	2.41262	0.0322453	7.82854	no
K11D9.1	klp-7	2.41256	0.0307539	9.14591	no
F37C12.4	rpl-36	2.41158	0.00209284	11.8211	no
F30F8.8	taf-5	2.41051	0.00443434	9.88683	no
F53G12.7	col-45	2.41044	0.00210487	12.9119	no
T21C12.2	hpd-1	2.4099	0.0133354	9.67037	no
B0035.5	gspd-1	2.40902	0.00903505	9.29822	no
F40G12.11	F40G12.11	2.40889	0.0263177	8.24861	no
F26A3.1	F26A3.1	2.40701	0.0103014	9.44045	no
Y39G10AR.13	icp-1	2.40685	0.00785533	8.97337	no
F57B1.3	col-159	2.40589	0.0290482	8.40552	no
F41G3.10	F41G3.10	2.40557	0.0131016	8.23237	no
C01G10.12	dnj-3	2.40474	0.0145974	8.1452	no
Y25C1A.13	Y25C1A.13	2.40461	0.00125094	8.76171	no
F28F8.2	acs-2	2.40441	0.00327732	7.95692	no
R02F2.1	R02F2.1	2.4042	0.00107394	9.80598	no
R10E11.1	cbp-1	2.40344	0.00897432	8.16271	no
F56D2.2	F56D2.2	2.40312	0.00682772	8.75666	no
F23H12.8	fipr-1	2.40209	0.00442126	7.88799	no
ZK418.4	lin-37	2.40092	0.00147132	9.51283	no
B0035.4	pfd-4	2.4008	0.0158129	9.42191	no
B0412.4	rps-29	2.40032	0.00139064	11.8253	no
F58G11.5	tag-65	2.4003	0.0025107	9.33905	no
T10G3.5	eea-1	2.39975	0.00251343	9.59582	no
F18A1.8	F18A1.8	2.39891	0.00282761	9.39959	no
Y37D8A.11	Y37D8A.11	2.39887	0.0218196	9.47849	no
C17E4.3	C17E4.3	2.39886	0.0142161	9.32463	no
C38D4.4	C38D4.4	2.39857	0.0210843	9.02988	no
T01C3.2	T01C3.2	2.39507	0.00721472	9.22476	no
T07C4.7	mev-1	2.39465	0.00132029	9.00371	no
F42A8.1	F42A8.1	2.39449	0.0435376	8.35747	no
C03G6.19	srp-6	2.39223	0.0426084	8.0982	no
C10C5.6	daf-15	2.39121	0.00172086	9.26869	no
F33D4.7	F33D4.7	2.39094	0.0213663	9.00549	no
Y69A2AR.30	mdf-2	2.39036	0.00834593	8.65233	no
ZC8.4	lfi-1	2.38924	0.00376407	8.83186	no
C32F10.1	obr-4	2.38907	0.0482151	8.9807	no
R07G3.5	pgam-5	2.38906	0.00446308	9.64652	no
W03G11.1	col-181	2.388	0.00243039	12.9371	no
C25E10.9	swm-1	2.38727	0.0292457	8.75315	no
K10C9.3	K10C9.3	2.38646	0.00179017	9.28209	no
F44B9.7	mdt-30	2.38629	0.00373522	8.59545	no
T11G6.1	hars-1	2.38574	0.00109036	9.94948	no
F36H1.4	lin-3	2.38573	0.00258772	7.39349	no
C06G3.5	C06G3.5	2.38515	0.00440025	9.05516	no
Y94H6A.3	Y94H6A.3	2.38466	0.00836964	8.63848	no
R74.4	dnj-16	2.3843	0.0112368	9.76653	no
K09E4.3	K09E4.3	2.38391	0.00738801	8.52526	no
C24A1.3	C24A1.3	2.38364	0.0459583	8.20198	no
T25G3.3	T25G3.3	2.38351	0.000587492	9.54638	no
Y110A7A.4	Y110A7A.4	2.38245	0.0290154	8.4314	no
F13H8.7	upb-1	2.38171	0.00283524	9.8871	no
F20D1.9	F20D1.9	2.38165	0.0066003	8.74141	no
F40G9.11	mxl-2	2.38041	0.00685451	9.56577	no
DY3.4	trt-1	2.37998	0.0163318	9.30854	no
C13G3.3	pptr-2	2.37975	0.00448963	8.34368	no
F35C8.5	F35C8.5	2.37905	0.00680858	8.24428	no
Y71G12B.1	Y71G12B.1	2.37829	0.0416003	8.67962	no
Y48A6B.7	Y48A6B.7	2.37624	0.0268079	8.94178	no
K07A1.11	rba-1	2.37618	0.001324	9.68613	no
T15B7.3	col-143	2.37608	0.00139087	13.8344	no
B0361.6	B0361.6	2.37562	0.0166167	8.95205	no
Y48B6A.14	hmg-1.1	2.37557	0.00416469	8.48329	no
K09A9.5	gas-1	2.37528	0.00210846	9.49019	no
C35D10.5	C35D10.5	2.37492	0.0336409	8.20447	no
Y32H12A.4	Y32H12A.4	2.37491	0.0130951	9.17907	no
F57B9.10	rpn-6.1	2.37485	0.0267403	8.73412	YES
T16G12.3	T16G12.3	2.37419	0.0168309	7.64082	no
ZK1005.1	pme-5	2.37392	0.00324562	8.59925	no
R10H10.3	R10H10.3	2.37385	0.00769609	9.90658	no
F17C11.7	F17C11.7	2.37373	0.00407488	9.26912	no
B0205.11	B0205.11	2.37366	0.0115202	8.87171	no
T07A9.1	pqbp-1.2	2.37334	0.0126806	10.1458	no
C46F4.2	acs-17	2.37331	0.0123236	8.57425	no
C06B3.7	C06B3.7	2.37092	0.0388109	7.81421	no
F54C9.5	rpl-5	2.37092	0.0114256	10.2681	no
D1037.4	rab-8	2.37072	0.00238994	8.35913	no
F57F5.5	pkc-1	2.37056	0.00533681	8.49071	no
C30H6.7	C30H6.7	2.37049	0.00516543	10.3659	no
H06O01.3	ctg-1	2.36939	0.00537221	9.36418	no
M106.8	M106.8	2.36911	0.0294751	8.28581	no
K08E4.2	K08E4.2	2.36883	0.01845	8.75057	no
K01H12.1	dph-3	2.36879	0.00136481	8.41649	no
Y49E10.4	Y49E10.4	2.36874	0.0215783	8.73884	no
W07B8.4	W07B8.4	2.36814	0.00478156	10.051	no
F59C6.12	F59C6.12	2.36775	0.00285405	7.8668	no
DY3.1	tin-13	2.36751	0.00111953	9.23849	no
F21D5.6	F21D5.6	2.36709	0.0121171	8.47911	no
MTCE.23	MTCE.23	2.36692	0.00683315	14.4206	no
F41G3.6	F41G3.6	2.36593	0.0296984	9.20685	no
K07F5.12	K07F5.12	2.36591	0.00109131	8.03074	no
D1014.4	D1014.4	2.365	0.0189433	9.21818	no
T09A5.5	T09A5.5	2.36492	0.0103207	9.45512	no
Y79H2A.2	Y79H2A.2	2.36425	0.00170415	7.67515	no
F01F1.12	aldo-2	2.36395	0.000908819	11.5483	no
F36H1.2	tag-144	2.36367	0.0143493	9.30111	no
B0564.7	B0564.7	2.3628	0.00613606	8.5576	no
Y48G1C.4	pgs-1	2.36201	0.00734213	9.00992	no
Y47D3A.4	cku-70	2.36118	0.0156666	8.19595	no
F44E7.5	F44E7.5	2.35942	0.00931182	9.65431	no
F59F3.1	ver-3	2.35885	0.00197269	8.52044	no
C02F12.5	C02F12.5	2.3584	0.0150637	8.20479	no
K04E7.2	pept-1	2.35827	0.0149507	8.51133	no
T20B12.7	T20B12.7	2.35763	0.00951319	9.45096	no
C08F8.3	C08F8.3	2.35671	0.00589918	9.27197	no
D2089.1	rsp-7	2.35662	0.0390884	9.82793	no
K02B9.4	elt-3	2.35612	0.00111801	8.17455	no
Y57G11C.11	coq-3	2.35603	0.00148305	8.18405	no
B0511.7	B0511.7	2.35563	0.0135001	9.50773	no
Y69A2AR.7	Y69A2AR.7	2.35504	0.0180439	7.88069	no
F10C2.2	kup-1	2.35413	0.0119892	9.691	no
F10E7.6	F10E7.6	2.35395	0.0114768	8.19016	no
F08B6.4	unc-87	2.35375	0.00312574	8.76942	no
F43G9.1	F43G9.1	2.35336	0.00499623	9.87544	no
F37B12.3	F37B12.3	2.35305	0.00581918	9.15274	no
W09B6.4	W09B6.4	2.35221	0.00345996	8.78427	no
C15F1.7	sod-1	2.35186	0.00211851	10.7003	no
F58G11.1	letm-1	2.35162	0.00494273	9.59544	no
C01G6.5	C01G6.5	2.35155	0.00951522	7.79946	no
F54D8.2	tag-174	2.35085	0.00130281	11.1251	no
C54C6.1	rpl-37	2.35021	0.00212187	12.3615	no
R12B2.1	sma-4	2.35003	0.00646043	8.043	no
Y46G5A.20	Y46G5A.20	2.34913	0.00795888	7.67138	no
F54F3.4	F54F3.4	2.34905	0.0027116	8.47575	no
C16C10.10	glod-4	2.34853	0.00742752	9.38054	no
Y32H12A.3	dhs-9	2.34848	0.00133123	10.0711	no
Y41E3.7	Y41E3.7	2.34803	0.00330705	9.19647	no
Y43F4B.5	Y43F4B.5	2.34788	0.00119369	9.53263	no
F10E7.5	F10E7.5	2.34767	0.0433229	9.04728	no
T05G5.9	T05G5.9	2.34711	0.00203247	8.84707	no
K04A8.5	lipl-4	2.34653	0.00776762	7.915	no
C01F1.1	C01F1.1	2.34639	0.0139797	8.28661	no
F54D7.4	zig-7	2.3463	0.00364835	9.25917	no
F52E4.1	pccb-1	2.34623	0.00223102	9.45908	no
Y54E10BR.6	rpb-7	2.34545	0.0191114	9.19565	no
F58A4.10	ubc-7	2.34534	0.00511603	8.76801	no
C14A4.5	crn-5	2.34378	0.00873593	8.83942	no
F46A9.5	skr-1	2.34338	0.00077469	10.3748	no
R10E12.1	alx-1	2.34267	0.0043058	9.52582	no
C18E9.9	C18E9.9	2.34213	0.0438704	8.40603	no
F22B5.9	fars-3	2.34191	0.0106396	9.5519	no
K04G2.3	cdc-48.3	2.34162	0.044891	8.83021	no
T24F1.1	raga-1	2.34044	0.00574587	9.26855	no
T16H12.11	T16H12.11	2.34005	0.0199335	8.63298	no
ZK829.4	ZK829.4	2.33929	0.00105779	12.141	no
K08C7.6	K08C7.6	2.33901	0.0160679	8.69702	no
H24K24.5	fmo-5	2.33877	0.015444	8.17215	no
T11F9.3	nas-20	2.33817	0.00737315	7.69853	no
K03E5.2	K03E5.2	2.33751	0.0119692	8.71801	no
C50F7.4	C50F7.4	2.33718	0.0138858	8.87086	no
C34D4.13	C34D4.13	2.3366	0.00727909	7.8967	no
T20F5.2	pbs-4	2.33656	0.00274011	10.5106	YES
C02D5.4	C02D5.4	2.3363	0.00124285	9.51853	no
C47D12.2	C47D12.2	2.33592	0.00863512	8.80012	no
R03G5.1	eef-1A.2	2.33584	0.00503616	14.0211	no
C27F2.5	vps-22	2.33579	0.00601725	9.74597	no
Y54F10AL.2	smg-6	2.33537	0.00827663	9.38724	no
T11B7.2	T11B7.2	2.33512	0.0047299	7.48033	no
C27A12.6	C27A12.6	2.33395	0.00236773	8.00122	no
F58F6.4	rfc-2	2.3335	0.0120206	8.35515	no
F09G2.2	F09G2.2	2.33286	0.00321231	8.80755	no
ZC434.4	ZC434.4	2.33246	0.00350328	8.80092	no
C28C12.7	spp-10	2.33236	0.000929346	11.4479	no
F57B10.6	xpg-1	2.33229	0.041758	9.2735	no
Y25C1A.7	Y25C1A.7	2.33181	0.00238187	8.46238	no
PAR2.3	aak-1	2.33068	0.00121069	7.99418	no
C18D11.4	rsp-8	2.32954	0.00612984	9.19489	no
Y49A3A.2	vha-13	2.32854	0.0027483	8.61678	no
F39H2.2	sig-7	2.32822	0.0342498	9.33068	no
F11A10.2	repo-1	2.32811	0.00142957	9.60225	no
C05C10.6	ufd-3	2.32744	0.00667567	9.52062	no
Y57E12AL.1	Y57E12AL.1	2.32735	0.00717391	10.8281	no
K08F4.9	dhs-12	2.32631	0.00553645	10.1468	no
T10E9.7	nuo-2	2.32595	0.00565942	10.1086	no
F10D2.11	ugt-41	2.32546	0.00629564	8.34369	no
B0280.3	rpia-1	2.32457	0.00631107	9.22715	no
F13D12.5	F13D12.5	2.32426	0.0220119	8.68304	no
D2005.3	D2005.3	2.3242	0.00303976	8.90034	no
E04F6.8	E04F6.8	2.32385	0.00163724	9.90844	no
F28C6.8	F28C6.8	2.3237	0.00945774	8.95807	no
Y73E7A.1	Y73E7A.1	2.32337	0.00207401	9.14569	no
B0464.6	B0464.6	2.32311	0.007477	8.25297	no
F23A7.8	F23A7.8	2.32253	0.0264011	9.83467	no
C26B2.1	dnc-4	2.32227	0.0100254	8.63344	no
ZK430.3	sod-5	2.32126	0.0365758	8.28175	no
ZK6.7	lipl-5	2.32	0.0288314	10.2889	no
C17E4.5	pabp-2	2.31996	0.00482395	10.1496	no
Y57G11C.9	Y57G11C.9	2.31955	0.00227934	9.69534	no
T27E9.3	cdk-5	2.31894	0.0123841	8.1611	no
F48D6.4	F48D6.4	2.31822	0.00172222	9.76841	no
C43E11.10	cdc-6	2.31793	0.00666245	9.41658	no
C04G6.3	pld-1	2.31664	0.0055005	8.21473	no
Y82E9BR.3	Y82E9BR.3	2.3164	0.00105581	13.0438	no
F42F12.7	nspc-14	2.31618	0.046306	7.4368	no
C44E4.5	C44E4.5	2.31549	0.00242278	9.59732	no
T19A6.2	ngp-1	2.3141	0.00122287	9.91589	no
T06E4.3	atl-1	2.31398	0.00477381	8.96223	no
Y73F4A.1	Y73F4A.1	2.31369	0.0202715	8.16294	no
T11G6.8	T11G6.8	2.31283	0.00958892	9.01407	no
K04G7.10	rnp-7	2.31229	0.00114377	9.40012	no
Y119D3B.11	Y119D3B.11	2.31228	0.0146992	8.23846	no
T23G7.3	T23G7.3	2.31216	0.002288	10.9878	no
C50H2.1	fshr-1	2.31209	0.0113745	8.41106	no
F07D3.2	flp-6	2.31187	0.0132102	9.06922	no
B0041.6	ptps-1	2.31142	0.00815267	7.80449	no
C01G6.6	tag-165	2.3113	0.032755	8.28523	no
F41E6.2	grd-5	2.31113	0.00190459	8.35317	no
VW02B12L.4	adbp-1	2.30973	0.0398677	9.27704	no
F02D8.4	F02D8.4	2.30963	0.0212868	8.20977	no
C44H4.7	eor-2	2.30828	0.0344632	8.99828	no
MTCE.31	MTCE.31	2.30773	0.00329786	13.1603	no
T08B1.1	T08B1.1	2.30735	0.00647538	8.40675	no
F23H11.5	F23H11.5	2.30687	0.000833218	10.5543	no
C12D12.2	glt-1	2.30679	0.0101506	8.80655	no
F21F3.7	F21F3.7	2.30641	0.046687	7.56461	no
F54D5.12	F54D5.12	2.3049	0.00373569	9.64574	no
F56B3.8	F56B3.8	2.30332	0.00436477	9.01671	no
R186.8	R186.8	2.30299	0.00311363	8.82657	no
F41E6.9	F41E6.9	2.30292	0.00701903	10.1711	no
T22H6.5	abf-5	2.30189	0.00263593	7.1068	no
C44E4.1	C44E4.1	2.30157	0.00306466	9.02812	no
W06B4.1	W06B4.1	2.30018	0.03653	9.25224	no
M01E11.4	pqn-52	2.29951	0.0108586	8.17625	no
Y51F10.2	Y51F10.2	2.29759	0.00565335	9.23782	no
F07A11.3	npp-5	2.29754	0.0116207	8.79772	no
F28H1.2	cpn-3	2.29723	0.00356553	10.9921	no
T10F2.3	ulp-1	2.29692	0.00730657	8.04252	no
F28B4.3	F28B4.3	2.29675	0.0167651	11.9117	no
F41E6.13	atg-18	2.29623	0.00655125	10.2124	no
C05E11.8	flp-12	2.29607	0.00355025	7.28669	no
R07B1.12	glo-1	2.29563	0.0107598	8.15194	no
F23F1.1	nfyc-1	2.29547	0.00166119	8.50211	no
B0379.1	B0379.1	2.29545	0.00836747	8.31617	no
F41G3.14	exos-8	2.29545	0.0146933	8.93291	no
C54G4.7	C54G4.7	2.29516	0.0123989	7.7199	no
F55C5.7	rskd-1	2.29478	0.0287672	8.26579	no
T01C3.6	rps-16	2.2938	0.0106183	13.8714	no
Y53F4B.9	Y53F4B.9	2.29355	0.00223328	8.46321	no
C33H5.12	rsp-6	2.29266	0.00798791	9.14652	no
Y47G6A.18	Y47G6A.18	2.29255	0.00353338	8.99558	no
T04C10.4	atf-5	2.29217	0.00755941	8.60844	no
ZK686.4	ZK686.4	2.29206	0.00116714	10.9385	no
R05D11.9	R05D11.9	2.29155	0.00145568	9.66089	no
C34C12.4	C34C12.4	2.29152	0.000703575	8.80863	no
C01C10.3	acl-12	2.29111	0.00596017	8.74776	no
C36E6.5	mlc-2	2.29089	0.0238626	10.7441	no
F44G4.2	F44G4.2	2.29055	0.0114733	9.92502	no
C36B1.7	dhfr-1	2.29044	0.0127976	9.31538	no
C49A9.9	C49A9.9	2.29034	0.00815063	8.44846	no
F11H8.1	rfl-1	2.28922	0.00282973	9.60418	no
Y45F10D.9	sas-6	2.28922	0.0278183	9.12081	no
T25G3.1	T25G3.1	2.28889	0.012878	8.42804	no
Y71H9A.3	sto-4	2.28842	0.0293606	8.02491	no
F38A5.1	F38A5.1	2.2883	0.00822332	8.42659	no
F01D4.2	ugt-44	2.28769	0.00359376	10.0734	no
C03D6.3	cel-1	2.28743	0.00448391	8.01001	no
B0547.1	csn-5	2.28724	0.005585	9.15496	no
K07A12.1	K07A12.1	2.28695	0.0013057	9.43969	no
T27F6.5	pars-2	2.28654	0.0222864	8.06609	no
T19B10.1	cyp-29A2	2.28623	0.00348943	8.65647	no
Y54G2A.49	Y54G2A.49	2.2856	0.0065628	8.56248	no
C38D4.6	pal-1	2.2854	0.00985384	8.18631	no
T13H5.4	T13H5.4	2.28524	0.011624	9.18025	no
Y41D4B.13	ced-2	2.28514	0.0251525	9.09993	no
Y105C5A.8	Y105C5A.8	2.28474	0.00590933	9.41342	no
H12C20.2	pms-2	2.28443	0.00460487	9.22804	no
F43G9.10	mfap-1	2.28395	0.00130018	9.56059	no
T26A8.4	T26A8.4	2.2839	0.0159996	8.08638	no
T06G6.9	pfd-3	2.28316	0.0145798	7.80831	no
T15B7.5	col-141	2.28306	0.0360262	8.37993	no
Y54E2A.11	eif-3.B	2.28295	0.0139138	9.92352	no
F49E11.1	mbk-2	2.28278	0.00464916	9.75583	no
C52E4.6	cyl-1	2.28229	0.0283835	9.75041	no
F47G4.2	F47G4.2	2.28203	0.0216562	8.05891	no
B0240.4	npp-22	2.28181	0.0217614	8.59283	no
F10G8.6	F10G8.6	2.28007	0.00293182	10.0371	no
Y42G9A.6	wht-7	2.27986	0.00704273	9.09452	no
ZK265.6	ZK265.6	2.27985	0.009126	9.18647	no
Y37E11AL.3	Y37E11AL.3	2.27951	0.00157301	10.2673	no
Y37E3.11	Y37E3.11	2.27894	0.00479395	8.12647	no
T06D8.5	T06D8.5	2.27873	0.00304593	9.58328	no
R107.7	gst-1	2.27818	0.00375306	11.4183	no
F10G8.1	F10G8.1	2.27756	0.0205057	7.69757	no
K07B1.5	acl-14	2.27752	0.00256115	9.49622	no
R07G3.7	R07G3.7	2.27714	0.0344107	7.80572	no
F25H2.10	rla-0	2.27645	0.00624188	13.7987	no
C30B5.1	tag-319	2.27645	0.0176413	8.70521	no
Y48G8AL.8	rpl-17	2.27497	0.0035378	11.0836	no
R05F9.6	R05F9.6	2.27388	0.00711203	8.61956	no
F20D1.3	F20D1.3	2.2734	0.00129857	8.96245	no
R05D3.9	R05D3.9	2.27316	0.0230687	9.27343	no
C41G7.6	C41G7.6	2.27205	0.0184349	12.2295	no
F22G12.4	F22G12.4	2.27204	0.00967145	8.05066	no
T20F10.2	T20F10.2	2.27086	0.00122165	8.03245	no
W06D12.3	fat-5	2.26995	0.00444527	10.6914	no
F47B7.2	F47B7.2	2.26988	0.00294873	9.33347	no
C06B3.3	cyp-35C1	2.26978	0.00826343	11.222	no
DC2.3	DC2.3	2.26973	0.0122718	7.93788	no
C36A4.1	cyp-25A1	2.26969	0.00418255	9.53518	no
Y48C3A.10	Y48C3A.10	2.26894	0.022244	9.40045	no
ZK154.4	ZK154.4	2.26889	0.0117802	7.64946	no
K01G5.7	tbb-1	2.26885	0.00471536	11.3693	no
Y54G11A.6	ctl-1	2.26876	0.0315347	10.0397	no
T05F1.2	T05F1.2	2.26859	0.0280079	10.0293	no
T22F3.3	T22F3.3	2.26796	0.0239327	9.18679	no
T16H12.4	T16H12.4	2.26785	0.00663973	8.71456	no
Y82E9BR.16	Y82E9BR.16	2.26759	0.0248911	9.25481	no
Y47D3A.21	Y47D3A.21	2.26729	0.0197602	7.79233	no
F55A11.3	sel-11	2.26719	0.00146726	9.70756	no
C17E7.4	C17E7.4	2.2654	0.0151264	8.49548	no
F42E11.2	ttyh-1	2.26477	0.00495242	9.26934	no
C01G10.7	C01G10.7	2.26437	0.0244299	9.74027	no
F25B5.7	psf-1	2.26405	0.00487588	9.77909	no
Y67D2.3	Y67D2.3	2.26391	0.00713233	9.55059	no
C02F5.9	pbs-6	2.26343	0.0043204	9.86679	YES
C48B4.4	ced-7	2.2634	0.0158999	8.7575	no
Y43C5A.5	thk-1	2.26231	0.00305334	8.95176	no
C26C6.2	goa-1	2.26203	0.00611621	9.27816	no
B0213.15	cyp-34A9	2.26175	0.00161679	7.93274	no
R08E3.1	R08E3.1	2.26021	0.00129503	9.51592	no
F32A11.3	F32A11.3	2.25995	0.00540584	7.35946	no
R148.6	heh-1	2.25957	0.00820886	10.538	no
K12H4.3	K12H4.3	2.25706	0.0115664	9.52425	no
ZK637.8	unc-32	2.25695	0.00392356	8.58788	no
C01G6.8	cam-1	2.25694	0.00769708	9.22338	no
C30F12.1	C30F12.1	2.25628	0.0236811	8.25642	no
Y43B11AR.4	rps-4	2.25625	0.00866417	13.912	no
ZK783.2	upp-1	2.25554	0.00529112	9.5636	no
T20D3.3	T20D3.3	2.25544	0.00381678	8.89453	no
C09E9.1	C09E9.1	2.2546	0.00341853	9.20075	no
C38H2.1	tbc-8	2.25379	0.0265153	7.5042	no
ZK632.12	ZK632.12	2.25322	0.0133973	9.61225	no
F44E2.9	F44E2.9	2.25215	0.0050728	8.27877	no
K04G7.1	K04G7.1	2.25203	0.0207923	8.73174	no
B0336.5	B0336.5	2.25157	0.0185882	9.11353	no
F35C5.8	clec-65	2.25117	0.00398441	12.7781	no
C25B8.3	cpr-6	2.25105	0.00153602	14.0885	no
T27A3.4	T27A3.4	2.25095	0.00152232	7.32572	no
R74.6	R74.6	2.24968	0.0265347	8.15088	no
B0024.10	B0024.10	2.24906	0.0148196	8.89515	no
C27H6.8	C27H6.8	2.24863	0.00657722	9.16694	no
R11F4.1	R11F4.1	2.24848	0.00113055	8.30386	no
C01G5.6	C01G5.6	2.24835	0.0200471	8.16763	no
R06F6.6	R06F6.6	2.24706	0.0108954	7.37839	no
T09A5.8	T09A5.8	2.24686	0.0056993	9.52519	no
Y39E4B.5	Y39E4B.5	2.24591	0.0112544	7.74044	no
PDB1.1	PDB1.1	2.24558	0.00129063	10.2668	no
Y49F6B.4	smu-2	2.24521	0.00632766	8.63004	no
C44B12.2	ost-1	2.24469	0.00855786	9.81635	no
F58E10.3	F58E10.3	2.24461	0.00139786	10.0161	no
C05E4.3	srp-1	2.24309	0.00244804	8.91812	no
Y53H1B.2	Y53H1B.2	2.24271	0.0056259	10.1974	no
Y46G5A.17	cpt-1	2.24249	0.00431278	9.24746	no
C46F11.5	C46F11.5	2.24192	0.0299521	8.14793	no
C15H11.4	dhs-22	2.2416	0.00514473	10.597	no
ZK945.2	pas-7	2.24148	0.0429866	8.31866	YES
T21B10.2	enol-1	2.24138	0.00174793	10.9453	no
Y71H2AM.11	Y71H2AM.11	2.24112	0.00189991	9.60876	no
F36A4.6	col-33	2.2406	0.0230299	8.34955	no
T03F1.3	pgk-1	2.24041	0.0207415	10.7534	no
F55H2.6	clu-1	2.24028	0.00184512	9.73419	no
ZK177.4	ZK177.4	2.24015	0.0106738	9.06743	no
ZK563.5	ZK563.5	2.24005	0.0106954	7.57364	no
T05H4.14	gad-1	2.23971	0.00516148	8.89354	no
W02B12.8	rga-1	2.23925	0.00640651	9.30552	no
F32E10.6	F32E10.6	2.2388	0.0032529	9.20528	no
D1014.8	spr-1	2.23858	0.0182102	8.10798	no
T03F1.2	coq-4	2.23834	0.0144003	8.78671	no
ZK822.5	ZK822.5	2.23819	0.0137263	7.55143	no
C16B8.1	lin-18	2.23782	0.00520788	8.16912	no
C01G8.2	cln-3.2	2.23753	0.00406282	8.75567	no
H27M09.1	H27M09.1	2.23737	0.023093	9.13569	no
F44B9.8	F44B9.8	2.23733	0.020218	8.74534	no
F55G1.2	his-59	2.23641	0.00753814	8.97815	no
ZK632.9	ZK632.9	2.23601	0.0165413	10.3444	no
F58D5.9	F58D5.9	2.23526	0.00256567	7.55873	no
R07E5.7	R07E5.7	2.23486	0.0182147	9.88246	no
B0495.2	B0495.2	2.23459	0.0045089	9.88961	no
C08B6.9	aos-1	2.2327	0.0465203	8.35104	no
F15A2.1	col-184	2.23262	0.00875325	11.2137	no
T21C9.5	lpd-9	2.2325	0.00300064	10.6433	no
F26F12.7	let-418	2.23188	0.000972441	10.348	no
F38H4.10	F38H4.10	2.23062	0.0258343	8.08626	no
F56D1.7	daz-1	2.23056	0.014564	10.3241	no
F07A11.5	F07A11.5	2.23039	0.0149228	8.93189	no
Y53C10A.13	fbxa-122	2.23032	0.00944883	7.61012	no
C55A6.4	C55A6.4	2.22997	0.0271548	7.51932	no
F28B3.10	F28B3.10	2.22921	0.00150769	9.26211	no
M18.2	dlc-2	2.22918	0.014647	7.41107	no
Y62E10A.8	mau-8	2.22865	0.0316523	8.73952	no
C26F1.4	rps-30	2.22858	0.00657851	13.7562	no
C26B9.5	C26B9.5	2.22751	0.00646573	9.6117	no
ZK381.4	pgl-1	2.22745	0.0468133	9.51232	no
W09C5.8	W09C5.8	2.22701	0.00141879	11.4617	no
Y54E10A.4	fog-1	2.22635	0.020569	7.98028	no
Y55D9A.1	efa-6	2.22626	0.0111157	9.11077	no
F29B9.11	F29B9.11	2.2261	0.00443802	10.357	no
ZK675.1	ptc-1	2.22584	0.00938896	8.01482	no
C12D8.1	C12D8.1	2.22518	0.004159	9.57816	no
H01M10.3	ttr-42	2.22489	0.00517032	8.79523	no
Y105E8A.21	Y105E8A.21	2.22453	0.00954419	9.01114	no
C34D1.5	zip-5	2.2245	0.036762	8.28454	no
C36B1.4	pas-4	2.22448	0.00285646	10.8292	YES
R08C7.10	wapl-1	2.22447	0.00682202	8.68464	no
T25E12.4	dkf-2	2.2238	0.0184738	7.99882	no
F29F11.3	tut-2	2.22343	0.005797	9.10055	no
Y39A1A.6	Y39A1A.6	2.22321	0.0324536	8.95666	no
ZK856.16	ZK856.16	2.22241	0.00209625	7.64299	no
C18E3.5	C18E3.5	2.22184	0.0372752	8.75244	no
T13F2.2	T13F2.2	2.22166	0.00796997	10.2863	no
T05C12.7	cct-1	2.22138	0.01046	11.0143	no
D2013.8	scp-1	2.22088	0.0144227	8.69526	no
C36B1.1	cle-1	2.22069	0.024034	8.02774	no
F35D11.5	F35D11.5	2.22038	0.00323947	8.72509	no
EEED8.8	ndx-6	2.22034	0.0138758	8.39661	no
F32D8.6	emo-1	2.22032	0.00548566	11.046	no
T05A1.2	col-122	2.2188	0.00502046	13.7216	no
K12F2.1	myo-3	2.21864	0.0413936	8.59813	no
C54E4.2	C54E4.2	2.21829	0.00255819	8.9817	no
C36B1.5	prp-4	2.21707	0.0110303	8.54051	no
F56A8.3	F56A8.3	2.21642	0.00766605	7.93349	no
B0365.1	B0365.1	2.21594	0.0437474	10.5966	no
C56C10.8	icd-1	2.21505	0.0032341	12.3298	no
F01D5.9	cyp-37A1	2.21399	0.0306605	8.54021	no
Y48G10A.7	rpr-1	2.21392	0.0103688	9.13456	no
Y105C5B.28	gln-3	2.21368	0.00455604	10.4606	no
T19D12.6	T19D12.6	2.21323	0.00244952	7.63231	no
F48E3.3	F48E3.3	2.21309	0.0112394	8.68277	no
W09B6.2	taf-6.1	2.21283	0.0125806	8.75125	no
C28H8.6	pxl-1	2.21219	0.0166319	7.9302	no
T07F8.4	T07F8.4	2.21209	0.00698073	9.65094	no
ZK836.2	ZK836.2	2.21194	0.0337247	7.84362	no
F27D4.7	F27D4.7	2.21119	0.04497	8.11412	no
K02B2.1	K02B2.1	2.21114	0.0293195	9.20208	no
C48B6.10	C48B6.10	2.21106	0.0021606	9.17856	no
C41G7.4	set-32	2.21095	0.0239015	8.89135	no
C07A12.7	C07A12.7	2.21016	0.00996047	8.42989	no
F53F1.4	F53F1.4	2.21007	0.00634799	7.78451	no
R06B10.5	tbc-10	2.20979	0.0482268	7.70881	no
Y48G10A.2	Y48G10A.2	2.20961	0.00236065	8.42623	no
T01B11.2	T01B11.2	2.20957	0.0142804	7.39632	no
F54D5.4	F54D5.4	2.20953	0.00355998	10.8586	no
Y54E10BR.4	Y54E10BR.4	2.20943	0.0347326	10.1711	no
Y37H2A.5	fbxa-210	2.20927	0.0248839	9.35846	no
F13G3.10	F13G3.10	2.20909	0.00699945	10.3723	no
C05D11.2	vps-16	2.20786	0.0170127	8.45019	no
F32A5.6	prx-13	2.20655	0.0155714	8.59481	no
ZK856.10	ZK856.10	2.20567	0.0385346	8.56854	no
R05D11.6	R05D11.6	2.20432	0.00950915	9.07733	no
F11H8.3	col-8	2.20424	0.00748497	11.8443	no
C36H8.3	flp-9	2.20361	0.0448091	8.17557	no
D2096.2	praf-3	2.20352	0.00504034	8.80726	no
M04G12.2	cpz-2	2.2035	0.00392426	10.5861	no
D1007.10	D1007.10	2.20272	0.00354619	8.72209	no
C14A4.6	C14A4.6	2.20195	0.0205116	8.15798	no
T05E11.4	spo-11	2.2019	0.00356147	8.70254	no
Y59A8A.1	csn-1	2.2016	0.0313889	8.86464	no
K10B2.2	K10B2.2	2.20048	0.00721532	7.83818	no
F46B6.12	F46B6.12	2.20018	0.009006	9.0711	no
F08B6.2	gpc-2	2.19989	0.0185783	8.90916	no
W04B5.3	W04B5.3	2.19971	0.0404967	7.60769	no
F27C1.2	F27C1.2	2.19971	0.00896385	10.9485	no
R119.6	taf-4	2.19911	0.0427872	8.56209	no
C24A3.2	C24A3.2	2.19859	0.0117036	7.78728	no
R57.1	R57.1	2.19843	0.00161571	10.2587	no
B0205.7	kin-3	2.19819	0.00366812	9.23408	no
C25H3.9	C25H3.9	2.19795	0.0127692	10.2145	no
W10G11.20	dnc-3	2.19765	0.0201968	8.47448	no
F36A2.6	rps-15	2.1976	0.00233063	12.4651	no
Y71H2AM.16	pho-9	2.19709	0.0145889	8.0368	no
K08E3.5	K08E3.5	2.19709	0.0227664	10.711	no
C41A3.1	C41A3.1	2.19704	0.0181348	8.48477	no
C09G4.5	mes-6	2.19624	0.00241768	9.39626	no
Y119D3B.21	Y119D3B.21	2.19337	0.0024949	12.745	no
D2023.7	col-158	2.19335	0.00289106	7.55933	no
ZC395.5	ZC395.5	2.19308	0.0169809	8.84204	no
Y66D12A.19	Y66D12A.19	2.19269	0.0331377	7.24817	no
Y39E4B.3	pqn-83	2.19089	0.0223377	9.60868	no
F43G6.9	patr-1	2.19049	0.00632999	8.37929	no
F10E9.3	F10E9.3	2.18951	0.00427417	8.3166	no
C18E9.11	ooc-5	2.18941	0.0113652	9.33578	no
Y18D10A.17	car-1	2.18915	0.0125417	10.38	no
F43E2.7	F43E2.7	2.18908	0.00404369	10.2732	no
Y45G5AM.7	Y45G5AM.7	2.18887	0.00176511	9.67692	no
F32D1.9	fipp-1	2.18865	0.0039293	10.0416	no
T25B9.9	T25B9.9	2.18781	0.00216509	10.2923	no
F44E2.8	F44E2.8	2.18781	0.0082335	10.5013	no
K12H4.7	K12H4.7	2.18692	0.0019006	8.59926	no
Y41D4B.19	npp-8	2.1869	0.00465635	9.30982	no
K03B4.7	cpg-8	2.186	0.00340376	9.85091	no
C48E7.3	lpd-2	2.1859	0.017458	9.09221	no
C52E12.1	C52E12.1	2.18577	0.00511445	8.31782	no
MTCE.11	MTCE.11	2.18566	0.00491319	11.783	no
Y71H2B.1	Y71H2B.1	2.18548	0.0300659	8.49861	no
F02E8.1	asb-2	2.18541	0.0021072	10.387	no
C49H3.11	rps-2	2.18499	0.00130314	13.1304	no
Y110A7A.7	Y110A7A.7	2.18405	0.0162995	8.19939	no
C16A3.7	tag-182	2.18384	0.0152265	9.25277	no
T22C1.3	T22C1.3	2.18378	0.022348	8.5401	no
[truncated: 1,592 more rows]
